# Supplementary material for: The kinesin-14 Klp2 is negatively regulated by the SIN for proper spindle elongation and telophase nuclear positioning
Source: PubMed Central journal article supplement — Mol Biol Cell. 2012 Dec 1;23(23):4592–600. doi: 10.1091/mbc.E12-07-0532 (PMC3510020; doi:10.1091/mbc.e12-07-0532), 2012-12-01
Supplement: supp_E12-07-0532_CombinedSupMats.pdf [file supp_E12-07-0532_CombinedSupMats.pdf]

Table S1. *S. pombe* strains used in this study

| Strains | Genotype                                                                                    | Source     |
|---------|---------------------------------------------------------------------------------------------|------------|
| YDM71   | <i>sid2-250 ade6-210 ura4-D18 leu1-32 h-</i>                                                | Lab stock  |
| YDM1117 | <i>sid2-250 klp2Δ::ura4+ ade6-21 his3-D1 h-</i>                                             | Lab stock  |
| YMD5314 | <i>sid2-250 mCherry-atb2::hph klp2-pk-GFP::ura h+</i>                                       | Lab stock  |
| YMD5301 | <i>mCherry-atb2::hph klp2-pk-GFP::ura h+</i>                                                | Lab stock  |
| YDM5336 | <i>cdc16-116 klp2-pk-GFP::ura mCherry-atb2::hph h-</i>                                      | Lab stock  |
| YDM5607 | <i>cdc3-124 cdc16-116 sid2-13Myc::kan h?</i>                                                | Lab stock  |
| YDM5952 | <i>nmt1-klp2-FLAG::leu sid2-250 klp2::ura ade6-21 his3-D1 h-</i>                            | This Study |
| YDM5953 | <i>nmt1-klp2-S2A-FLAG::leu sid2-250 klp2::ura ade6-21 his3-D1 h-</i>                        | This Study |
| YDM6056 | <i>nmt1-klp2-S2E-FLAG::leu sid2-250 klp2Δ::ura ade6-21 his3-D1 h-</i>                       | This Study |
| YDM105  | <i>ade6-210 leu1-32 ura4-D18 h+</i>                                                         | Lab stock  |
| YDM6108 | <i>dhc1Δ::kan klp2Δ::ura leu- ade6-21 ura4-D18 leu1-32 h-</i>                               | This Study |
| YDM6109 | <i>dhc1Δ::kan klp2Δ::ura nmt1-klp2-FLAG::leu ade6-21 ura4-D18 leu1-32 h+</i>                | This Study |
| YDM6110 | <i>dhc1Δ::kan klp2Δ::ura nmt1-klp2-2A-FLAG::leu ade6-21 ura4-D18 leu1-32 h+</i>             | This Study |
| YDM6111 | <i>dhc1Δ::kan klp2Δ::ura nmt1-klp2-2E-FLAG::leu ade6-21 ura4-D18 leu1-32 h+</i>             | This Study |
| YDM106  | <i>ade6-210 leu1-32 ura4-D18 h-</i>                                                         | This Study |
| YDM6246 | <i>dhc1Δ::kan klp2Δ::ura leu- ade6-21 ura4-D18 leu1-32 h+</i>                               | This Study |
| YDM6247 | <i>dhc1Δ::kan klp2Δ::ura nmt1-klp2-FLAG::leu ade6-21 ura4-D18 leu1-32 h-</i>                | This Study |
| YDM6248 | <i>dhc1Δ::kan klp2Δ::ura nmt1-klp2-2A-FLAG::leu ade6-21 ura4-D18 leu1-32 h-</i>             | This Study |
| YDM6249 | <i>dhc1Δ::kan klp2Δ::ura nmt1-klp2-2E-FLAG::leu ade6-21 ura4-D18 leu1-32 h-</i>             | This Study |
| YDM1214 | <i>cps1-191 leu1-32 lys1-131 ura4-D18 ade6 h-</i>                                           | Lab stock  |
| YDM6058 | <i>nmt1-klp2-FLAG::leu klp2Δ::ura ade6-216 his3-D1 cps1-191 h-</i>                          | This Study |
| YDM6059 | <i>nmt1-klp2-S2A-FLAG::leu klp2Δ::ura ade6-216 his3-D1 cps1-191h+</i>                       | This Study |
| YDM5874 | <i>nmt1-klp2-GFP::leu klp2Δ::ura4 ade6-216 leu1-32 ura4-D18 his3-D1 h+</i>                  | This Study |
| YDM5880 | <i>nmt1-klp2-S2A-GFP::leu klp2Δ::ura4 ade6-216 leu1-32 ura4-D18 his3-D1h+</i>               | This Study |
| YDM5994 | <i>nmt1-klp2-S2E-GFP::leu klp2Δ::ura4 ade6-216 leu1-32 ura4-D18 his3 h+</i>                 | This Study |
| YDM6209 | <i>nmt1-klp2-FLAG::leu cdc11-GFP::kan klp2Δ::ura ade6-216 leu1-32 ura4-D18 his3-D1? h?</i>  | This Study |
| YDM6210 | <i>nmt1-klp2-S2A-FLAG::leu cdc11-GFP::kan klp2Δ::ura ade6-216 leu1-32 ura4-D18 his3-D1?</i> | This Study |
| YDM1142 | <i>sid2-250 sid4-GFP::kan ura4-D18 ade6-21X h-</i>                                          | Lab stock  |
| YDM971  | <i>sid4-GFP::kan ade6-21X leu1-32 ura4-D18 h-</i>                                           | Lab stock  |
| YDM6250 | <i>nmt1-klp2-FLAG::leu cdc16-116 klp2Δ::ura ade6-216 leu1-32 ura4-D18 his3-D1? h?</i>       | This Study |
| YDM6251 | <i>nmt1-klp2-S2A-FLAG::leu cdc16-116 klp2Δ::ura ade6-216 leu1-32 ura4-D18 his3-D1? h?</i>   | This Study |
| YDM5766 | <i>mal3Δ::ura klp2-pk-GFP::ura mCherry-atb2::hph leu1-32 ura4-D18 his3Δ ade6-210 h?</i>     | This Study |
| YDM5400 | <i>mal3Δ::ura4 sid2-250 leu1-32 ur4+ ade6-210 h+</i>                                        | Lab stock  |
| YDM5883 | <i>nmt1-klp2-SxDD1-GFP::leu mCherry-atb2::hph leu1-32 ura4-D18 h-</i>                       | This Study |
| YDM5884 | <i>nmt1-klp2-SxDD2-GFP::leu mCherry-atb2::hph leu1-32 ura4-D18 h-</i>                       | This Study |
| YDM5877 | <i>nmt1-klp2-SxDD1+2-GFP::leu klp2::ura4 ade6-216 leu1-32 ura4-D18 his3-D1</i>              | This Study |
| YDM6071 | <i>myp2Δ::kan cps1-191 ade6-M210 leu1-32 ura4-D18 lys131? h?</i>                            | This Study |
| YDM6252 | <i>nmt1-klp2-FLAG::leu myp2Δ::kan cps1-191 ade6-M210 leu1-32 ura4-D18 lys131? h?</i>        | This Study |
| YDM6253 | <i>nmt1-klp2-S2A-FLAG::leu myp2Δ::kan cps1-191 ade6-M210 leu1-32 ura4-D18 lys131? h?</i>    | This Study |

**Table S2. All assigned spectra for Klp2 peptides from LC-MS/MS analysis of GST-Klp2 or Klp2-HATAF**

| Where    | Start | Stop | Peptide Sequence | Variable Modifications | Localization Prob. | Ascore | Scaffold: Peptide Prob. | Mass    | Observed m/z | Z |
|----------|-------|------|------------------|------------------------|--------------------|--------|-------------------------|---------|--------------|---|
| in vitro | 8     | 20   | SLTSHLPQSSSSL    |                        |                    |        | 100.0%                  | 1342.67 | 672.58       | 2 |
| in vitro | 8     | 20   | SLTSHLPQSSSSL    |                        |                    |        | 99.9%                   | 1342.67 | 672.62       | 2 |
| in vitro | 8     | 20   | SLTSHLPQSSSSL    |                        |                    |        | 100.0%                  | 1342.67 | 672.60       | 2 |
| in vitro | 8     | 20   | SLTSHLPQSSSSL    |                        |                    |        | 100.0%                  | 1342.67 | 672.56       | 2 |
| in vitro | 8     | 20   | SLTSHLPQSSSSL    |                        |                    |        | 99.8%                   | 1342.67 | 672.32       | 2 |
| in vitro | 8     | 19   | SLTSHLPQSSSS     |                        |                    |        | 63.1%                   | 1229.59 | 616.11       | 2 |
| in vitro | 8     | 19   | SLTSHLPQSSSS     |                        |                    |        | 56.1%                   | 1229.59 | 616.06       | 2 |
| in vitro | 8     | 18   | SLTSHLPQSSS      |                        |                    |        | 50.3%                   | 1142.56 | 572.55       | 2 |
| in vitro | 8     | 19   | SLTSHLPQSSSS     |                        |                    |        | 74.9%                   | 1229.59 | 615.53       | 2 |
| in vitro | 8     | 19   | SLTSHLPQSSSS     |                        |                    |        | 57.7%                   | 1229.59 | 615.36       | 2 |
| in vitro | 8     | 17   | SLTSHLPQSS       |                        |                    |        | 100.0%                  | 1055.52 | 528.74       | 2 |
| in vitro | 8     | 18   | SLTSHLPQSSS      |                        |                    |        | 99.2%                   | 1142.56 | 572.29       | 2 |
| in vitro | 8     | 17   | SLTSHLPQSS       |                        |                    |        | 99.9%                   | 1055.52 | 529.12       | 2 |
| in vitro | 8     | 16   | SLTSHLPQS        |                        |                    |        | 61.6%                   | 968.49  | 484.81       | 2 |
| in vitro | 8     | 16   | SLTSHLPQS        |                        |                    |        | 92.1%                   | 968.49  | 485.27       | 2 |
| in vitro | 8     | 16   | SLTSHLPQS        |                        |                    |        | 97.2%                   | 968.49  | 485.48       | 2 |
| in vitro | 8     | 18   | SLTSHLPQSSS      |                        |                    |        | 74.4%                   | 1142.56 | 572.58       | 2 |
| in vitro | 8     | 16   | SLTSHLPQS        |                        |                    |        | 88.2%                   | 968.49  | 485.19       | 2 |
| in vitro | 8     | 16   | SLTSHLPQS        |                        |                    |        | 85.1%                   | 968.49  | 485.54       | 2 |
| in vitro | 8     | 16   | SLTSHLPQS        |                        |                    |        | 99.5%                   | 968.49  | 485.49       | 2 |
| in vitro | 8     | 16   | SLTSHLPQS        |                        |                    |        | 99.9%                   | 968.49  | 485.23       | 2 |
| in vitro | 8     | 17   | SLTSHLPQSS       |                        |                    |        | 52.4%                   | 1055.52 | 528.54       | 2 |
| in vitro | 10    | 20   | TSHLPQSSSSL      |                        |                    |        | 100.0%                  | 1142.56 | 572.55       | 2 |
| in vitro | 10    | 20   | TSHLPQSSSSL      |                        |                    |        | 100.0%                  | 1142.56 | 572.20       | 2 |
| in vitro | 10    | 20   | TSHLPQSSSSL      |                        |                    |        | 100.0%                  | 1142.56 | 572.58       | 2 |
| in vitro | 10    | 20   | TSHLPQSSSSL      |                        |                    |        | 99.8%                   | 1142.56 | 572.54       | 2 |
| in vitro | 10    | 20   | TSHLPQSSSSL      |                        |                    |        | 99.9%                   | 1142.56 | 572.28       | 2 |
| in vitro | 10    | 20   | TSHLPQSSSSL      |                        |                    |        | 100.0%                  | 1142.56 | 572.56       | 2 |
| in vitro | 10    | 20   | TSHLPQSSSSL      |                        |                    |        | 88.3%                   | 1142.56 | 572.18       | 2 |
| in vitro | 10    | 20   | TSHLPQSSSSL      |                        |                    |        | 91.1%                   | 1142.56 | 572.06       | 2 |
| in vitro | 13    | 24   | LPQSSSSLQSR      |                        |                    |        | 96.7%                   | 1275.64 | 639.14       | 2 |
| in vitro | 14    | 24   | PQSSSSLQSR       |                        |                    |        | 100.0%                  | 1162.56 | 582.47       | 2 |
| in vitro | 25    | 28   | EIAK             |                        |                    |        | 97.9%                   | 459.27  | 460.78       | 1 |
| in vitro | 25    | 28   | EIAK             |                        |                    |        | 93.6%                   | 459.27  | 460.89       | 1 |
| in vitro | 25    | 28   | EIAK             |                        |                    |        | 50.4%                   | 459.27  | 460.67       | 1 |
| in vitro | 25    | 28   | EIAK             |                        |                    |        | 68.7%                   | 459.27  | 460.70       | 1 |
| in vitro | 29    | 40   | EFTSNIPPPTIK     |                        |                    |        | 100.0%                  | 1342.71 | 672.63       | 2 |
| in vitro | 29    | 40   | EFTSNIPPPTIK     |                        |                    |        | 100.0%                  | 1342.71 | 672.32       | 2 |
| in vitro | 29    | 40   | EFTSNIPPPTIK     |                        |                    |        | 100.0%                  | 1342.71 | 672.63       | 2 |
| in vitro | 29    | 40   | EFTSNIPPPTIK     |                        |                    |        | 100.0%                  | 1342.71 | 672.64       | 2 |
| in vitro | 29    | 40   | EFTSNIPPPTIK     |                        |                    |        | 100.0%                  | 1342.71 | 672.36       | 2 |
| in vitro | 29    | 40   | EFTSNIPPPTIK     |                        |                    |        | 100.0%                  | 1342.71 | 672.27       | 2 |
| in vitro | 29    | 40   | EFTSNIPPPTIK     |                        |                    |        | 100.0%                  | 1342.71 | 672.31       | 2 |
| in vitro | 29    | 40   | EFTSNIPPPTIK     |                        |                    |        | 100.0%                  | 1342.71 | 672.65       | 2 |
| in vitro | 29    | 40   | EFTSNIPPPTIK     |                        |                    |        | 100.0%                  | 1342.71 | 672.68       | 2 |
| in vitro | 29    | 40   | EFTSNIPPPTIK     |                        |                    |        | 100.0%                  | 1342.71 | 672.65       | 2 |
| in vitro | 29    | 40   | EFTSNIPPPTIK     |                        |                    |        | 100.0%                  | 1342.71 | 672.61       | 2 |
| in vitro | 29    | 40   | EFTSNIPPPTIK     |                        |                    |        | 100.0%                  | 1342.71 | 672.55       | 2 |
| in vitro | 29    | 40   | EFTSNIPPPTIK     |                        |                    |        | 100.0%                  | 1342.71 | 672.63       | 2 |
| in vitro | 29    | 40   | EFTSNIPPPTIK     |                        |                    |        | 100.0%                  | 1342.71 | 672.65       | 2 |
| in vitro | 29    | 40   | EFTSNIPPPTIK     |                        |                    |        | 100.0%                  | 1342.71 | 672.60       | 2 |
| in vitro | 29    | 40   | EFTSNIPPPTIK     |                        |                    |        | 100.0%                  | 1342.71 | 672.34       | 2 |
| in vitro | 29    | 40   | EFTSNIPPPTIK     |                        |                    |        | 100.0%                  | 1342.71 | 672.55       | 2 |
| in vitro | 29    | 40   | EFTSNIPPPTIK     |                        |                    |        | 100.0%                  | 1342.71 | 672.59       | 2 |
| in vitro | 29    | 40   | EFTSNIPPPTIK     |                        |                    |        | 100.0%                  | 1342.71 | 672.63       | 2 |
| in vitro | 29    | 40   | EFTSNIPPPTIK     |                        |                    |        | 100.0%                  | 1342.71 | 672.28       | 2 |

| Where    | Start | Stop | Peptide Sequence | Variable Modifications | Localization Prob. | Ascore | Scaffold: Peptide Prob. | Mass    | Observed m/z | Z |
|----------|-------|------|------------------|------------------------|--------------------|--------|-------------------------|---------|--------------|---|
| in vitro | 29    | 40   | EFTSNIPPPTIK     |                        |                    |        | 100.0%                  | 1342.71 | 673.10       | 2 |
| in vitro | 29    | 40   | EFTSNIPPPTIK     |                        |                    |        | 100.0%                  | 1342.71 | 672.62       | 2 |
| in vitro | 29    | 40   | EFTSNIPPPTIK     |                        |                    |        | 100.0%                  | 1342.71 | 672.61       | 2 |
| in vitro | 29    | 40   | EFTSNIPPPTIK     |                        |                    |        | 100.0%                  | 1342.71 | 672.61       | 2 |
| in vitro | 29    | 40   | EFTSNIPPPTIK     |                        |                    |        | 78.3%                   | 1342.71 | 673.11       | 2 |
| in vitro | 29    | 40   | EFTSNIPPPTIK     |                        |                    |        | 100.0%                  | 1342.71 | 672.58       | 2 |
| in vitro | 29    | 40   | EFTSNIPPPTIK     |                        |                    |        | 100.0%                  | 1342.71 | 672.62       | 2 |
| in vitro | 29    | 40   | EFTSNIPPPTIK     |                        |                    |        | 100.0%                  | 1342.71 | 672.67       | 2 |
| in vitro | 29    | 40   | EFTSNIPPPTIK     |                        |                    |        | 100.0%                  | 1342.71 | 672.62       | 2 |
| in vitro | 29    | 40   | EFTSNIPPPTIK     |                        |                    |        | 100.0%                  | 1342.71 | 672.62       | 2 |
| in vitro | 29    | 40   | EFTSNIPPPTIK     |                        |                    |        | 100.0%                  | 1342.71 | 672.59       | 2 |
| in vitro | 29    | 40   | EFTSNIPPPTIK     |                        |                    |        | 100.0%                  | 1342.71 | 673.13       | 2 |
| in vitro | 29    | 40   | EFTSNIPPPTIK     |                        |                    |        | 100.0%                  | 1342.71 | 672.55       | 2 |
| in vitro | 29    | 40   | EFTSNIPPPTIK     |                        |                    |        | 100.0%                  | 1342.71 | 672.63       | 2 |
| in vitro | 29    | 40   | EFTSNIPPPTIK     |                        |                    |        | 100.0%                  | 1342.71 | 672.29       | 2 |
| in vitro | 29    | 40   | EFTSNIPPPTIK     |                        |                    |        | 100.0%                  | 1342.71 | 672.63       | 2 |
| in vitro | 29    | 40   | EFTSNIPPPTIK     |                        |                    |        | 100.0%                  | 1342.71 | 672.66       | 2 |
| in vitro | 29    | 40   | EFTSNIPPPTIK     |                        |                    |        | 100.0%                  | 1342.71 | 672.35       | 2 |
| in vitro | 29    | 40   | EFTSNIPPPTIK     |                        |                    |        | 100.0%                  | 1342.71 | 672.56       | 2 |
| in vitro | 29    | 40   | EFTSNIPPPTIK     |                        |                    |        | 100.0%                  | 1342.71 | 672.63       | 2 |
| in vitro | 29    | 40   | EFTSNIPPPTIK     |                        |                    |        | 100.0%                  | 1342.71 | 672.67       | 2 |
| in vitro | 29    | 40   | EFTSNIPPPTIK     |                        |                    |        | 100.0%                  | 1342.71 | 673.13       | 2 |
| in vitro | 29    | 40   | EFTSNIPPPTIK     |                        |                    |        | 100.0%                  | 1342.71 | 672.63       | 2 |
| in vitro | 29    | 40   | EFTSNIPPPTIK     |                        |                    |        | 100.0%                  | 1342.71 | 672.64       | 2 |
| in vitro | 29    | 40   | EFTSNIPPPTIK     |                        |                    |        | 100.0%                  | 1342.71 | 672.62       | 2 |
| in vitro | 29    | 40   | EFTSNIPPPTIK     |                        |                    |        | 100.0%                  | 1342.71 | 672.33       | 2 |
| in vitro | 29    | 40   | EFTSNIPPPTIK     |                        |                    |        | 100.0%                  | 1342.71 | 673.21       | 2 |
| in vitro | 29    | 40   | EFTSNIPPPTIK     |                        |                    |        | 100.0%                  | 1342.71 | 672.63       | 2 |
| in vitro | 29    | 40   | EFTSNIPPPTIK     |                        |                    |        | 100.0%                  | 1342.71 | 672.56       | 2 |
| in vitro | 29    | 40   | EFTSNIPPPTIK     |                        |                    |        | 91.0%                   | 1342.71 | 448.93       | 3 |
| in vitro | 29    | 40   | EFTSNIPPPTIK     |                        |                    |        | 99.2%                   | 1342.71 | 672.46       | 2 |
| in vitro | 29    | 40   | EFTSNIPPPTIK     |                        |                    |        | 99.8%                   | 1342.71 | 448.93       | 3 |
| in vitro | 29    | 40   | EFTSNIPPPTIK     |                        |                    |        | 100.0%                  | 1342.71 | 672.46       | 2 |
| in vitro | 29    | 40   | EFTSNIPPPTIK     |                        |                    |        | 93.7%                   | 1342.71 | 448.95       | 3 |
| in vitro | 29    | 40   | EFTSNIPPPTIK     |                        |                    |        | 100.0%                  | 1342.71 | 672.53       | 2 |
| in vitro | 29    | 40   | EFTSNIPPPTIK     |                        |                    |        | 84.0%                   | 1342.71 | 448.99       | 3 |
| in vitro | 29    | 40   | EFTSNIPPPTIK     |                        |                    |        | 100.0%                  | 1342.71 | 1343.59      | 1 |
| in vitro | 29    | 40   | EFTSNIPPPTIK     |                        |                    |        | 50.8%                   | 1342.71 | 673.42       | 2 |
| in vitro | 31    | 42   | TSNIPPPTIKTN     |                        |                    |        | 100.0%                  | 1281.69 | 642.09       | 2 |
| in vitro | 31    | 42   | TSNIPPPTIKTN     |                        |                    |        | 100.0%                  | 1281.69 | 641.80       | 2 |
| in vitro | 31    | 42   | TSNIPPPTIKTN     |                        |                    |        | 100.0%                  | 1281.69 | 642.10       | 2 |
| in vitro | 31    | 42   | TSNIPPPTIKTN     |                        |                    |        | 100.0%                  | 1281.69 | 642.09       | 2 |
| in vitro | 31    | 42   | TSNIPPPTIKTN     |                        |                    |        | 100.0%                  | 1281.69 | 642.18       | 2 |
| in vitro | 31    | 47   | TSNIPPPTIKTNSSSN |                        |                    |        | 100.0%                  | 1743.86 | 873.15       | 2 |
| in vitro | 31    | 42   | TSNIPPPTIKTN     |                        |                    |        | 100.0%                  | 1281.69 | 642.03       | 2 |
| in vitro | 41    | 52   | TNSSSSNILEKPR    |                        |                    |        | 100.0%                  | 1302.69 | 652.34       | 2 |
| in vitro | 41    | 52   | TNSSSSNILEKPR    |                        |                    |        | 100.0%                  | 1302.69 | 652.63       | 2 |
| in vitro | 41    | 52   | TNSSSSNILEKPR    |                        |                    |        | 100.0%                  | 1302.69 | 652.62       | 2 |
| in vitro | 41    | 52   | TNSSSSNILEKPR    |                        |                    |        | 100.0%                  | 1302.69 | 652.63       | 2 |
| in vitro | 41    | 52   | TNSSSSNILEKPR    |                        |                    |        | 100.0%                  | 1302.69 | 652.63       | 2 |
| in vitro | 41    | 52   | TNSSSSNILEKPR    |                        |                    |        | 100.0%                  | 1302.69 | 652.33       | 2 |
| in vitro | 41    | 52   | TNSSSSNILEKPR    |                        |                    |        | 100.0%                  | 1302.69 | 652.63       | 2 |
| in vitro | 41    | 52   | TNSSSSNILEKPR    |                        |                    |        | 100.0%                  | 1302.69 | 652.67       | 2 |
| in vitro | 41    | 52   | TNSSSSNILEKPR    |                        |                    |        | 100.0%                  | 1302.69 | 652.65       | 2 |
| in vitro | 41    | 52   | TNSSSSNILEKPR    |                        |                    |        | 100.0%                  | 1302.69 | 652.31       | 2 |
| in vitro | 41    | 52   | TNSSSSNILEKPR    |                        |                    |        | 100.0%                  | 1302.69 | 652.58       | 2 |
| in vitro | 41    | 52   | TNSSSSNILEKPR    |                        |                    |        | 100.0%                  | 1302.69 | 652.66       | 2 |
| in vitro | 41    | 52   | TNSSSSNILEKPR    |                        |                    |        | 100.0%                  | 1302.69 | 652.84       | 2 |

| Where    | Start | Stop | Peptide Sequence | Variable Modifications | Localization Prob. | Ascore   | Scaffold: Peptide Prob. | Mass    | Observed m/z | Z |
|----------|-------|------|------------------|------------------------|--------------------|----------|-------------------------|---------|--------------|---|
| in vitro | 41    | 52   | TNSSSSNILKPR     |                        |                    |          | 100.0%                  | 1302.69 | 652.59       | 2 |
| in vitro | 41    | 52   | TNSSSSNILKPR     |                        |                    |          | 100.0%                  | 1302.69 | 652.54       | 2 |
| in vitro | 41    | 52   | TNSSSSNILKPR     |                        |                    |          | 100.0%                  | 1302.69 | 652.60       | 2 |
| in vitro | 41    | 52   | TNSSSSNILKPR     |                        |                    |          | 99.9%                   | 1302.69 | 653.08       | 2 |
| in vitro | 41    | 52   | TNSSSSNILKPR     |                        |                    |          | 100.0%                  | 1302.69 | 435.42       | 3 |
| in vitro | 41    | 52   | TNSSSSNILKPR     |                        |                    |          | 98.2%                   | 1302.69 | 435.83       | 3 |
| in vitro | 41    | 50   | TNSSSSNILK       |                        |                    |          | 84.1%                   | 1049.54 | 526.02       | 2 |
| in vitro | 41    | 50   | TNSSSSNILK       |                        |                    |          | 71.6%                   | 1049.54 | 526.00       | 2 |
| in vitro | 41    | 52   | TNSSSSNILKPR     |                        |                    |          | 95.8%                   | 1302.69 | 435.68       | 3 |
| in vitro | 43    | 52   | SSSSNILKPR       |                        |                    |          | 99.9%                   | 1087.60 | 545.04       | 2 |
| in vitro | 43    | 52   | SSSSNILKPR       |                        |                    |          | 100.0%                  | 1087.60 | 545.18       | 2 |
| in vitro | 43    | 52   | SSSSNILKPR       |                        |                    |          | 95.3%                   | 1087.60 | 545.16       | 2 |
| in vitro | 43    | 52   | SSSSNILKPR       |                        |                    |          | 63.0%                   | 1087.60 | 545.17       | 2 |
| in vitro | 53    | 66   | LSLQNEVNQLKPAK   |                        |                    |          | 100.0%                  | 1580.89 | 528.41       | 3 |
| in vitro | 53    | 66   | LSLQNEVNQLKPAK   |                        |                    |          | 99.9%                   | 1580.89 | 528.40       | 3 |
| in vitro | 53    | 66   | LSLQNEVNQLKPAK   |                        |                    |          | 76.7%                   | 1580.89 | 528.44       | 3 |
| in vitro | 53    | 66   | LSLQNEVNQLKPAK   |                        |                    |          | 82.0%                   | 1580.89 | 528.49       | 3 |
| in vitro | 53    | 66   | LSLQNEVNQLKPAK   |                        |                    |          | 100.0%                  | 1580.89 | 528.10       | 3 |
| in vitro | 53    | 66   | LSLQNEVNQLKPAK   |                        |                    |          | 100.0%                  | 1580.89 | 528.61       | 3 |
| in vitro | 53    | 66   | LSLQNEVNQLKPAK   |                        |                    |          | 95.5%                   | 1580.89 | 528.49       | 3 |
| in vitro | 53    | 66   | LSLQNEVNQLKPAK   |                        |                    |          | 100.0%                  | 1580.89 | 528.68       | 3 |
| in vitro | 53    | 66   | LSLQNEVNQLKPAK   |                        |                    |          | 100.0%                  | 1580.89 | 528.41       | 3 |
| in vitro | 53    | 66   | LSLQNEVNQLKPAK   |                        |                    |          | 97.5%                   | 1580.89 | 528.57       | 3 |
| in vitro | 53    | 66   | LSLQNEVNQLKPAK   |                        |                    |          | 100.0%                  | 1580.89 | 528.42       | 3 |
| in vitro | 53    | 66   | LSLQNEVNQLKPAK   |                        |                    |          | 88.9%                   | 1580.89 | 528.49       | 3 |
| in vitro | 53    | 66   | LSLQNEVNQLKPAK   |                        |                    |          | 91.1%                   | 1580.89 | 791.70       | 2 |
| in vitro | 53    | 66   | LSLQNEVNQLKPAK   |                        |                    |          | 72.4%                   | 1580.89 | 791.75       | 2 |
| in vitro | 53    | 66   | LSLQNEVNQLKPAK   |                        |                    |          | 100.0%                  | 1580.89 | 528.22       | 3 |
| in vitro | 53    | 66   | LSLQNEVNQLKPAK   |                        |                    |          | 100.0%                  | 1580.89 | 528.38       | 3 |
| in vitro | 53    | 66   | LSLQNEVNQLKPAK   |                        |                    |          | 89.6%                   | 1580.89 | 791.72       | 2 |
| in vitro | 53    | 66   | LSLQNEVNQLKPAK   |                        |                    |          | 100.0%                  | 1580.89 | 528.24       | 3 |
| in vitro | 53    | 66   | LSLQNEVNQLKPAK   |                        |                    |          | 100.0%                  | 1580.89 | 528.42       | 3 |
| in vitro | 53    | 66   | LSLQNEVNQLKPAK   |                        |                    |          | 94.4%                   | 1580.89 | 528.68       | 3 |
| in vitro | 53    | 66   | LSLQNEVNQLKPAK   |                        |                    |          | 62.9%                   | 1580.89 | 528.32       | 3 |
| in vitro | 53    | 66   | LSLQNEVNQLKPAK   |                        |                    |          | 80.9%                   | 1580.89 | 791.74       | 2 |
| in vitro | 53    | 66   | LSLQNEVNQLKPAK   |                        |                    |          | 100.0%                  | 1580.89 | 527.90       | 3 |
| in vitro | 53    | 63   | LSLQNEVNQLK      |                        |                    |          | 100.0%                  | 1284.70 | 643.61       | 2 |
| in vitro | 53    | 63   | LSLQNEVNQLK      |                        |                    |          | 100.0%                  | 1284.70 | 643.63       | 2 |
| in vitro | 53    | 66   | LSLQNEVNQLKPAK   |                        |                    |          | 83.4%                   | 1580.89 | 792.20       | 2 |
| in vitro | 53    | 66   | LSLQNEVNQLKPAK   |                        |                    |          | 88.8%                   | 1580.89 | 791.68       | 2 |
| in vitro | 53    | 66   | LSLQNEVNQLKPAK   |                        |                    |          | 64.0%                   | 1580.89 | 528.45       | 3 |
| in vitro | 53    | 66   | LSLQNEVNQLKPAK   |                        |                    |          | 90.7%                   | 1580.89 | 528.31       | 3 |
| in vitro | 53    | 66   | LSLQNEVNQLKPAK   |                        |                    |          | 83.5%                   | 1580.89 | 528.26       | 3 |
| in vitro | 53    | 66   | LSLQNEVNQLKPAK   |                        |                    |          | 99.9%                   | 1580.89 | 528.11       | 3 |
| in vitro | 53    | 66   | LSLQNEVNQLKPAK   |                        |                    |          | 94.4%                   | 1580.89 | 528.71       | 3 |
| in vitro | 53    | 66   | LSLQNEVNQLKPAK   |                        |                    |          | 97.5%                   | 1580.89 | 528.45       | 3 |
| in vitro | 53    | 66   | LSLQNEVNQLKPAK   |                        |                    |          | 99.0%                   | 1580.89 | 528.22       | 3 |
| in vitro | 53    | 63   | LSLQNEVNQLK      |                        |                    |          | 99.6%                   | 1284.70 | 643.79       | 2 |
| in vitro | 56    | 66   | QNEVNQLKPAK      |                        |                    |          | 63.1%                   | 1267.69 | 635.17       | 2 |
| in vitro | 57    | 66   | NEVNQLKPAK       |                        |                    |          | 86.5%                   | 1139.63 | 571.13       | 2 |
| in vitro | 57    | 66   | NEVNQLKPAK       |                        |                    |          | 66.2%                   | 1139.63 | 571.10       | 2 |
| in vitro | 58    | 66   | EVNQLKPAK        |                        |                    |          | 98.9%                   | 1025.59 | 514.08       | 2 |
| in vitro | 71    | 81   | mLPPGSLASVK      | M1 Oxidation           | 100%               | 1,000.00 | 77.6%                   | 1114.61 | 558.30       | 2 |
| in vitro | 71    | 81   | mLPPGSLASVK      | M1 Oxidation           | 100%               | 1,000.00 | 81.5%                   | 1114.61 | 558.24       | 2 |
| in vitro | 71    | 81   | mLPPGSLASVK      | M1 Oxidation           | 100%               | 1,000.00 | 95.8%                   | 1114.61 | 558.33       | 2 |
| in vitro | 71    | 81   | mLPPGSLASVK      | M1 Oxidation           | 100%               | 1,000.00 | 79.5%                   | 1114.61 | 558.50       | 2 |
| in vitro | 71    | 81   | mLPPGSLASVK      | M1 Oxidation           | 100%               | 1,000.00 | 79.6%                   | 1114.61 | 558.51       | 2 |
| in vitro | 71    | 81   | mLPPGSLASVK      | M1 Oxidation           | 100%               | 1,000.00 | 71.5%                   | 1114.61 | 558.51       | 2 |

| Where    | Start | Stop | Peptide Sequence       | Variable Modifications                                 | Localization Prob. | Ascore                 | Scaffold: Peptide Prob. | Mass    | Observed m/z | Z |
|----------|-------|------|------------------------|--------------------------------------------------------|--------------------|------------------------|-------------------------|---------|--------------|---|
| in vitro | 71    | 81   | mLPPGSLASVK            | M1 Oxidation                                           | 100%               | 1,000.00               | 98.6%                   | 1114.61 | 558.31       | 2 |
| in vitro | 71    | 81   | mLPPGSLASVK            | M1 Oxidation                                           | 100%               | 1,000.00               | 90.5%                   | 1114.61 | 558.36       | 2 |
| in vitro | 71    | 81   | mLPPGSLASVK            | M1 Oxidation                                           | 100%               | 1,000.00               | 80.7%                   | 1114.61 | 558.56       | 2 |
| in vitro | 73    | 81   | PPGSLASVK              |                                                        |                    |                        | 92.4%                   | 854.49  | 428.60       | 2 |
| in vitro | 88    | 99   | KARPFTASSNPR           |                                                        |                    |                        | 100.0%                  | 1330.71 | 444.89       | 3 |
| in vitro | 88    | 99   | KARPFTASSNPR           |                                                        |                    |                        | 100.0%                  | 1330.71 | 444.94       | 3 |
| in vitro | 88    | 99   | KARPFTASSNPR           |                                                        |                    |                        | 100.0%                  | 1330.71 | 444.95       | 3 |
| in vitro | 88    | 99   | KARPFTASSNPR           |                                                        |                    |                        | 93.0%                   | 1330.71 | 444.72       | 3 |
| in vitro | 88    | 99   | KARPFTASSNPR           |                                                        |                    |                        | 91.9%                   | 1330.71 | 666.67       | 2 |
| in vitro | 89    | 99   | ARPFTASSNPR            |                                                        |                    |                        | 97.3%                   | 1202.62 | 402.33       | 3 |
| in vitro | 89    | 99   | ARPFTASSNPR            |                                                        |                    |                        | 100.0%                  | 1202.62 | 602.39       | 2 |
| in vitro | 89    | 99   | ARPFTASSNPR            |                                                        |                    |                        | 100.0%                  | 1202.62 | 402.23       | 3 |
| in vitro | 89    | 99   | ARPFTASSNPR            |                                                        |                    |                        | 100.0%                  | 1202.62 | 602.61       | 2 |
| in vitro | 89    | 99   | ARPFTASSNPR            |                                                        |                    |                        | 100.0%                  | 1202.62 | 402.32       | 3 |
| in vitro | 89    | 99   | ARPFTASSNPR            |                                                        |                    |                        | 99.9%                   | 1202.62 | 602.25       | 2 |
| in vitro | 89    | 99   | ARPFTASSNPR            |                                                        |                    |                        | 100.0%                  | 1202.62 | 602.41       | 2 |
| in vitro | 89    | 99   | ARPFTASSNPR            |                                                        |                    |                        | 100.0%                  | 1202.62 | 602.33       | 2 |
| in vitro | 89    | 99   | ARPFTASSNPR            |                                                        |                    |                        | 100.0%                  | 1202.62 | 602.58       | 2 |
| in vitro | 89    | 99   | ARPFTASSNPR            |                                                        |                    |                        | 100.0%                  | 1202.62 | 602.55       | 2 |
| in vitro | 89    | 99   | ARPFTASSNPR            |                                                        |                    |                        | 79.4%                   | 1202.62 | 402.59       | 3 |
| in vitro | 89    | 99   | ARPFTASSNPR            |                                                        |                    |                        | 100.0%                  | 1202.62 | 402.14       | 3 |
| in vitro | 89    | 99   | ARPFTASSNPR            |                                                        |                    |                        | 97.6%                   | 1202.62 | 402.28       | 3 |
| in vitro | 89    | 99   | ARPFTASSNPR            |                                                        |                    |                        | 98.9%                   | 1202.62 | 402.18       | 3 |
| in vitro | 89    | 99   | ARPFTASSNPR            |                                                        |                    |                        | 99.9%                   | 1202.62 | 602.55       | 2 |
| in vitro | 89    | 99   | ARPFTASSNPR            |                                                        |                    |                        | 100.0%                  | 1202.62 | 402.03       | 3 |
| in vitro | 89    | 99   | ARPFTASSNPR            |                                                        |                    |                        | 99.9%                   | 1202.62 | 602.65       | 2 |
| in vitro | 89    | 99   | ARPFTASSNPR            |                                                        |                    |                        | 100.0%                  | 1202.62 | 402.11       | 3 |
| in vitro | 89    | 99   | ARPFTASSNPR            |                                                        |                    |                        | 93.6%                   | 1202.62 | 602.26       | 2 |
| in vitro | 89    | 99   | ARPFTASSNPR            |                                                        |                    |                        | 100.0%                  | 1202.62 | 402.31       | 3 |
| in vitro | 89    | 99   | ARPFTASSNPR            |                                                        |                    |                        | 98.6%                   | 1202.62 | 602.45       | 2 |
| in vitro | 89    | 99   | ARPFTASSNPR            |                                                        |                    |                        | 99.3%                   | 1202.62 | 602.68       | 2 |
| in vitro | 89    | 99   | ARPFTASSNPR            |                                                        |                    |                        | 100.0%                  | 1202.62 | 602.28       | 2 |
| in vitro | 89    | 99   | ARPFTASSNPR            |                                                        |                    |                        | 55.2%                   | 1202.62 | 402.15       | 3 |
| in vitro | 89    | 99   | ARPFTASSNPR            |                                                        |                    |                        | 100.0%                  | 1202.62 | 602.29       | 2 |
| in vitro | 89    | 99   | ARPFTASSNPR            |                                                        |                    |                        | 99.6%                   | 1202.62 | 401.81       | 3 |
| in vitro | 89    | 99   | ARPFTASSNPR            |                                                        |                    |                        | 89.6%                   | 1202.62 | 602.56       | 2 |
| in vitro | 89    | 99   | ARPFTASSNPR            |                                                        |                    |                        | 100.0%                  | 1202.62 | 602.63       | 2 |
| in vitro | 89    | 99   | ARPFTASSNPR            |                                                        |                    |                        | 96.6%                   | 1202.62 | 602.63       | 2 |
| in vitro | 89    | 99   | ARPFTASSNPR            |                                                        |                    |                        | 100.0%                  | 1202.62 | 603.25       | 2 |
| in vitro | 89    | 99   | ARPFTASSNPR            |                                                        |                    |                        | 100.0%                  | 1202.62 | 602.75       | 2 |
| in vitro | 89    | 99   | ARPFTASSNPR            |                                                        |                    |                        | 100.0%                  | 1202.62 | 603.24       | 2 |
| in vitro | 89    | 99   | ARPFTASSNPR            |                                                        |                    |                        | 100.0%                  | 1202.62 | 602.46       | 2 |
| in vitro | 89    | 99   | ARPFTASSNPR            |                                                        |                    |                        | 99.3%                   | 1202.62 | 602.61       | 2 |
| in vitro | 89    | 99   | ARPFiASSNPR            | T5 Dehydro                                             | 98%                | 20.63                  | 100.0%                  | 1184.61 | 593.64       | 2 |
| in vitro | 89    | 99   | ARPFTASSNPR            |                                                        |                    |                        | 93.2%                   | 1202.62 | 603.21       | 2 |
| in vitro | 89    | 99   | ARPFTASSNPR            |                                                        |                    |                        | 97.8%                   | 1202.62 | 602.65       | 2 |
| in vitro | 89    | 99   | ARPFTASSNPR            |                                                        |                    |                        | 100.0%                  | 1202.62 | 603.26       | 2 |
| in vitro | 89    | 99   | ARPFTASSNPR            |                                                        |                    |                        | 100.0%                  | 1202.62 | 402.18       | 3 |
| in vitro | 89    | 99   | ARPFTASSNPR            |                                                        |                    |                        | 85.7%                   | 1202.62 | 602.65       | 2 |
| in vitro | 89    | 110  | ARPFiASSNPRmPKsAHPiSSR | T5 Phosphorylation, M12 Oxidation, S15 Phosphorylation | 99%, 100%, 90%     | 22.37, 1,000.00, 12.84 | 98.4%                   | 2570.16 | 857.27       | 3 |
| in vitro | 89    | 99   | ARPFTASSNPR            |                                                        |                    |                        | 98.5%                   | 1202.62 | 602.72       | 2 |
| in vitro | 89    | 99   | ARPFTASSNPR            |                                                        |                    |                        | 100.0%                  | 1202.62 | 602.25       | 2 |
| in vitro | 89    | 99   | ARPFiASSNPR            | T5 Phosphorylation                                     | 100%               | 24.32                  | 100.0%                  | 1282.58 | 642.62       | 2 |
| in vitro | 91    | 99   | PFTASSNPR              |                                                        |                    |                        | 100.0%                  | 975.48  | 488.72       | 2 |
| in vitro | 91    | 99   | PFTASSNPR              |                                                        |                    |                        | 100.0%                  | 975.48  | 488.81       | 2 |
| in vitro | 91    | 99   | PFTASSNPR              |                                                        |                    |                        | 98.5%                   | 975.48  | 489.08       | 2 |
| in vitro | 91    | 99   | PFTASSNPR              |                                                        |                    |                        | 99.7%                   | 975.48  | 489.04       | 2 |
| in vitro | 91    | 99   | PFTASSNPR              |                                                        |                    |                        | 99.9%                   | 975.48  | 489.03       | 2 |

| Where    | Start | Stop | Peptide Sequence | Variable Modifications | Localization Prob. | Ascore | Scaffold: Peptide Prob. | Mass    | Observed m/z | Z |
|----------|-------|------|------------------|------------------------|--------------------|--------|-------------------------|---------|--------------|---|
| in vitro | 91    | 99   | PFTASSNPR        |                        |                    |        | 100.0%                  | 975.48  | 488.78       | 2 |
| in vitro | 91    | 99   | PFTASSNPR        |                        |                    |        | 100.0%                  | 975.48  | 488.71       | 2 |
| in vitro | 91    | 99   | PFTASSNPR        |                        |                    |        | 99.4%                   | 975.48  | 489.07       | 2 |
| in vitro | 91    | 99   | PFTASSNPR        |                        |                    |        | 99.7%                   | 975.48  | 489.57       | 2 |
| in vitro | 91    | 99   | PFTASSNPR        |                        |                    |        | 99.5%                   | 975.48  | 489.49       | 2 |
| in vitro | 91    | 99   | PFTASSNPR        |                        |                    |        | 99.8%                   | 975.48  | 489.01       | 2 |
| in vitro | 91    | 99   | PFTASSNPR        |                        |                    |        | 98.6%                   | 975.48  | 487.96       | 2 |
| in vitro | 91    | 99   | PFTASSNPR        |                        |                    |        | 78.6%                   | 975.48  | 488.05       | 2 |
| in vitro | 91    | 99   | PFTASSNPR        |                        |                    |        | 95.8%                   | 975.48  | 487.95       | 2 |
| in vitro | 91    | 99   | PFTASSNPR        |                        |                    |        | 100.0%                  | 975.48  | 489.02       | 2 |
| in vitro | 91    | 99   | PFTASSNPR        |                        |                    |        | 100.0%                  | 975.48  | 489.64       | 2 |
| in vitro | 91    | 99   | PFTASSNPR        |                        |                    |        | 100.0%                  | 975.48  | 489.55       | 2 |
| in vitro | 91    | 99   | PFTASSNPR        |                        |                    |        | 100.0%                  | 975.48  | 488.75       | 2 |
| in vitro | 103   | 110  | SAHPISRR         |                        |                    |        | 99.1%                   | 853.44  | 427.99       | 2 |
| in vitro | 103   | 110  | SAHPISRR         |                        |                    |        | 98.0%                   | 853.44  | 427.96       | 2 |
| in vitro | 103   | 110  | SAHPISRR         |                        |                    |        | 99.2%                   | 853.44  | 427.99       | 2 |
| in vitro | 103   | 110  | SAHPISRR         |                        |                    |        | 99.9%                   | 853.44  | 427.74       | 2 |
| in vitro | 103   | 110  | SAHPISRR         |                        |                    |        | 81.0%                   | 853.44  | 428.03       | 2 |
| in vitro | 103   | 110  | SAHPISRR         |                        |                    |        | 99.7%                   | 853.44  | 428.00       | 2 |
| in vitro | 103   | 110  | SAHPISRR         |                        |                    |        | 94.2%                   | 853.44  | 428.04       | 2 |
| in vitro | 103   | 110  | SAHPISRR         |                        |                    |        | 99.9%                   | 853.44  | 427.75       | 2 |
| in vitro | 103   | 110  | SAHPISRR         |                        |                    |        | 99.7%                   | 853.44  | 427.92       | 2 |
| in vitro | 103   | 110  | SAHPISRR         |                        |                    |        | 79.7%                   | 853.44  | 428.04       | 2 |
| in vitro | 103   | 110  | SAHPISRR         |                        |                    |        | 60.6%                   | 853.44  | 428.01       | 2 |
| in vitro | 103   | 110  | SAHPISRR         |                        |                    |        | 96.9%                   | 853.44  | 427.98       | 2 |
| in vitro | 103   | 110  | SAHPISRR         |                        |                    |        | 99.6%                   | 853.44  | 427.76       | 2 |
| in vitro | 103   | 110  | SAHPISRR         |                        |                    |        | 98.8%                   | 853.44  | 427.95       | 2 |
| in vitro | 103   | 110  | SAHPISRR         |                        |                    |        | 94.1%                   | 853.44  | 427.99       | 2 |
| in vitro | 103   | 110  | SAHPISRR         |                        |                    |        | 94.1%                   | 853.44  | 428.04       | 2 |
| in vitro | 103   | 110  | SAHPISRR         |                        |                    |        | 96.3%                   | 853.44  | 427.91       | 2 |
| in vitro | 103   | 110  | SAHPISRR         |                        |                    |        | 83.3%                   | 853.44  | 427.70       | 2 |
| in vitro | 103   | 110  | SAHPISRR         |                        |                    |        | 52.3%                   | 853.44  | 427.76       | 2 |
| in vitro | 103   | 110  | SAHPISRR         |                        |                    |        | 98.6%                   | 853.44  | 428.01       | 2 |
| in vitro | 103   | 110  | SAHPISRR         |                        |                    |        | 100.0%                  | 853.44  | 427.79       | 2 |
| in vitro | 103   | 110  | SAHPISRR         |                        |                    |        | 100.0%                  | 853.44  | 428.00       | 2 |
| in vitro | 103   | 110  | SAHPISRR         |                        |                    |        | 64.0%                   | 853.44  | 428.06       | 2 |
| in vitro | 103   | 110  | SAHPISRR         |                        |                    |        | 64.9%                   | 853.44  | 428.63       | 2 |
| in vitro | 103   | 110  | SAHPISRR         |                        |                    |        | 100.0%                  | 853.44  | 427.75       | 2 |
| in vitro | 103   | 110  | SAHPISRR         |                        |                    |        | 100.0%                  | 853.44  | 427.74       | 2 |
| in vitro | 103   | 110  | SAHPISRR         |                        |                    |        | 86.0%                   | 853.44  | 427.99       | 2 |
| in vitro | 103   | 110  | SAHPISRR         |                        |                    |        | 78.9%                   | 853.44  | 427.86       | 2 |
| in vitro | 103   | 110  | SAHPISRR         |                        |                    |        | 100.0%                  | 853.44  | 427.98       | 2 |
| in vitro | 103   | 110  | SAHPISRR         |                        |                    |        | 64.3%                   | 853.44  | 428.02       | 2 |
| in vitro | 103   | 110  | SAHPISRR         |                        |                    |        | 58.3%                   | 853.44  | 428.01       | 2 |
| in vitro | 103   | 110  | SAHPISRR         |                        |                    |        | 67.2%                   | 853.44  | 428.01       | 2 |
| in vitro | 103   | 110  | SAHPISRR         |                        |                    |        | 65.9%                   | 853.44  | 427.98       | 2 |
| in vitro | 111   | 120  | SVsASSHFGR       | S3 Dehydro             | 100%               | 39.03  | 99.9%                   | 1015.48 | 508.95       | 2 |
| in vitro | 111   | 120  | SVsASSHFGR       | S3 Dehydro             | 100%               | 25.77  | 100.0%                  | 1015.48 | 508.95       | 2 |
| in vitro | 111   | 120  | SVsASSHFGR       | S3 Dehydro             | 100%               | 34.65  | 99.0%                   | 1015.48 | 508.94       | 2 |
| in vitro | 111   | 120  | SVsASSHFGR       | S3 Dehydro             | 93%                | 11.45  | 89.5%                   | 1015.48 | 508.95       | 2 |
| in vitro | 111   | 120  | SVsASSHFGR       | S3 Dehydro             | 100%               | 25.77  | 97.1%                   | 1015.48 | 508.93       | 2 |
| in vitro | 111   | 120  | SVsASSHFGR       | S3 Dehydro             | 100%               | 23.3   | 92.2%                   | 1015.48 | 508.95       | 2 |
| in vitro | 111   | 120  | SVsASSHFGR       | S3 Dehydro             | 100%               | 23.3   | 100.0%                  | 1015.48 | 508.93       | 2 |
| in vitro | 111   | 120  | SVsASSHFGR       | S3 Dehydro             | 100%               | 23.3   | 100.0%                  | 1015.48 | 508.94       | 2 |
| in vitro | 111   | 120  | SVsASSHFGR       | S3 Dehydro             | 100%               | 21.4   | 99.7%                   | 1015.48 | 508.95       | 2 |
| in vitro | 111   | 120  | SVsASSHFGR       | S3 Dehydro             | 100%               | 18.53  | 100.0%                  | 1015.48 | 508.94       | 2 |
| in vitro | 111   | 120  | SVsASSHFGR       | S3 Dehydro             | 100%               | 18.53  | 99.2%                   | 1015.48 | 508.98       | 2 |
| in vitro | 111   | 120  | SVsASSHFGR       | S3 Dehydro             | 100%               | 25.77  | 75.5%                   | 1015.48 | 508.82       | 2 |

| Where    | Start | Stop | Peptide Sequence                        | Variable Modifications                  | Localization Prob. | Ascore             | Scaffold: Peptide Prob. | Mass    | Observed m/z | z |
|----------|-------|------|-----------------------------------------|-----------------------------------------|--------------------|--------------------|-------------------------|---------|--------------|---|
| in vitro | 111   | 120  | SVsASSHFGR                              | S3 Dehydro                              | 100%               | 23.3               | 97.5%                   | 1015.48 | 508.91       | 2 |
| in vitro | 111   | 120  | SVSASSHFGR                              |                                         |                    |                    | 100.0%                  | 1033.49 | 518.06       | 2 |
| in vitro | 111   | 120  | SVSASSHFGR                              |                                         |                    |                    | 100.0%                  | 1033.49 | 518.06       | 2 |
| in vitro | 111   | 120  | SVSASSHFGR                              |                                         |                    |                    | 100.0%                  | 1033.49 | 517.81       | 2 |
| in vitro | 111   | 120  | SVsASSHFGR                              | S3 Phosphorylation                      | 100%               | 25.77              | 99.6%                   | 1113.46 | 557.99       | 2 |
| in vitro | 111   | 120  | SVsASSHFGR                              | S3 Phosphorylation                      | 100%               | 23.3               | 92.4%                   | 1113.46 | 558.00       | 2 |
| in vitro | 111   | 120  | SVsASSHFGR                              | S3 Phosphorylation                      | 100%               | 25.77              | 64.8%                   | 1113.46 | 557.95       | 2 |
| in vitro | 111   | 136  | SVsASSHFGRPA <sub>s</sub> AVSSSLNSSDDVR | S3 Phosphorylation, S13 Dehydro         | 0%, 93%            | 0.00, 17.90        | 9.6%                    | 2668.19 | 890.66       | 3 |
| in vitro | 111   | 136  | SVsASSHFGRPA <sub>s</sub> AVSSSLNSSDDVR | S3 Phosphorylation, S6 Phosphorylation  | 0%, 99%            | 0.00, 23.70        | 7.7%                    | 2766.16 | 923.27       | 3 |
| in vitro | 111   | 136  | SVsASSHFGRPA <sub>s</sub> AVSSSLNSSDDVR | S5 Phosphorylation, S6 Dehydro          | 90%, 97%           | 22.45, 19.78       | 6.9%                    | 2668.19 | 890.68       | 3 |
| in vitro | 111   | 136  | SVsASSHFGRPA <sub>s</sub> AVSSSLNSSDDVR | S3 Dehydro                              | 20%                | 7.87               | 81.5%                   | 2588.22 | 864.30       | 3 |
| in vitro | 111   | 136  | SVsASSHFGRPA <sub>s</sub> AVSSSLNSSDDVR | S3 Dehydro                              | 3%                 | 14.04              | 93.0%                   | 2588.22 | 864.13       | 3 |
| in vitro | 111   | 136  | sVSASSHFGRPA <sub>s</sub> AVSSSLNSSDDVR | S1 Dehydro                              | 0%                 | 0                  | 78.0%                   | 2588.22 | 864.26       | 3 |
| in vitro | 111   | 136  | SVsASSHFGRPA <sub>s</sub> AVSSSLNSSDDVR | S3 Dehydro                              | 1%                 | 11.1               | 68.7%                   | 2588.22 | 864.14       | 3 |
| in vitro | 111   | 136  | SVsASSHFGRPA <sub>s</sub> AVSSSLNSSDDVR | S3 Dehydro                              | 72%                | 9.05               | 62.0%                   | 2588.22 | 864.18       | 3 |
| in vitro | 111   | 136  | SVsASSHFGRPA <sub>s</sub> AVSSSLNSSDDVR | S3 Dehydro                              | 24%                | 7.39               | 53.1%                   | 2588.22 | 864.17       | 3 |
| in vitro | 111   | 136  | SVsASSHFGRPA <sub>s</sub> AVSSSLNSSDDVR | S3 Dehydro                              | 1%                 | 0                  | 58.6%                   | 2588.22 | 864.21       | 3 |
| in vitro | 111   | 136  | SVsASSHFGRPA <sub>s</sub> AVSSSLNSSDDVR | S3 Dehydro                              | 4%                 | 0                  | 32.3%                   | 2588.22 | 864.28       | 3 |
| in vitro | 111   | 136  | SVsASSHFGRPA <sub>s</sub> AVSSSLNSSDDVR | S3 Dehydro                              | 4%                 | 0                  | 100.0%                  | 2588.22 | 864.19       | 3 |
| in vitro | 111   | 136  | SVsASSHFGRPA <sub>s</sub> AVSSSLNSSDDVR | S3 Phosphorylation, S13 Phosphorylation | 21%, 100%          | 0.00, 24.53        | 39.1%                   | 2766.16 | 923.65       | 3 |
| in vitro | 111   | 136  | sVSASSHFGRPA <sub>s</sub> AVSSSLNSSDDVR | S1 Phosphorylation                      | 26%                | 5.71               | 100.0%                  | 2686.20 | 897.24       | 3 |
| in vitro | 111   | 136  | sVSASSHFGRPA <sub>s</sub> AVSSSLNSSDDVR | S1 Phosphorylation, S13 Phosphorylation | 18%, 96%           | 0.00, 16.36        | 20.0%                   | 2766.16 | 923.44       | 3 |
| in vitro | 111   | 136  | SVsASSHFGRPA <sub>s</sub> AVSSSLNSSDDVR | S3 Phosphorylation                      | 21%                | 0                  | 100.0%                  | 2686.20 | 896.84       | 3 |
| in vitro | 111   | 136  | SVsASSHFGRPA <sub>s</sub> AVSSSLNSSDDVR | S3 Phosphorylation                      | 0%                 | 0                  | 96.1%                   | 2686.20 | 896.74       | 3 |
| in vitro | 111   | 136  | SVsASSHFGRPA <sub>s</sub> AVSSSLNSSDDVR | S3 Phosphorylation                      | 47%                | 8.63               | 100.0%                  | 2686.20 | 897.05       | 3 |
| in vitro | 111   | 136  | SVsASSHFGRPA <sub>s</sub> AVSSSLNSSDDVR | S3 Phosphorylation                      | 5%                 | 0                  | 100.0%                  | 2686.20 | 896.96       | 3 |
| in vitro | 111   | 136  | SVsASSHFGRPA <sub>s</sub> AVSSSLNSSDDVR |                                         |                    |                    | 100.0%                  | 2606.23 | 869.98       | 3 |
| in vitro | 111   | 136  | SVsASSHFGRPA <sub>s</sub> AVSSSLNSSDDVR |                                         |                    |                    | 100.0%                  | 2606.23 | 870.10       | 3 |
| in vitro | 111   | 120  | SVsASSHFGR                              | S3 Dehydro                              | 100%               | 19.84              | 100.0%                  | 1015.48 | 509.03       | 2 |
| in vitro | 111   | 120  | SVsASSHFGR                              | S3 Dehydro                              | 100%               | 31.37              | 100.0%                  | 1015.48 | 509.01       | 2 |
| in vitro | 111   | 120  | SVSASSHFGR                              |                                         |                    |                    | 100.0%                  | 1033.49 | 518.11       | 2 |
| in vitro | 111   | 120  | SVSASSHFGR                              |                                         |                    |                    | 100.0%                  | 1033.49 | 518.10       | 2 |
| in vitro | 119   | 130  | GRPASAVSSSLN                            |                                         |                    |                    | 100.0%                  | 1144.58 | 573.54       | 2 |
| in vitro | 121   | 136  | PASAVSSSLNSSDDVR                        |                                         |                    |                    | 100.0%                  | 1590.75 | 531.61       | 3 |
| in vitro | 121   | 136  | PASAVSSSLNSSDDVR                        |                                         |                    |                    | 100.0%                  | 1590.75 | 796.65       | 2 |
| in vitro | 121   | 136  | PASAVSSSLNSSDDVR                        |                                         |                    |                    | 100.0%                  | 1590.75 | 796.64       | 2 |
| in vitro | 121   | 136  | PASAVSSSLNSSDDVR                        |                                         |                    |                    | 100.0%                  | 1590.75 | 796.62       | 2 |
| in vitro | 121   | 136  | PASAVSSSLNSSDDVR                        |                                         |                    |                    | 100.0%                  | 1590.75 | 796.74       | 2 |
| in vitro | 121   | 136  | PA <sub>s</sub> AVSSSLNSSDDVR           | S3 Phosphorylation                      | 56%                | 5.77               | 100.0%                  | 1670.71 | 836.12       | 2 |
| in vitro | 137   | 150  | SmSDESmESYNDEK                          | M2 Oxidation                            | 100%               | 139.79             | 100.0%                  | 1666.60 | 834.53       | 2 |
| in vitro | 137   | 150  | SmSDESmESYNDEK                          | M2 Oxidation, M7 Oxidation              | 100%, 100%         | 1,000.00, 1,000.00 | 100.0%                  | 1682.59 | 842.54       | 2 |
| in vitro | 137   | 150  | SmSDESmESYNDEK                          | M2 Oxidation, M7 Oxidation              | 100%, 100%         | 1,000.00, 1,000.00 | 100.0%                  | 1682.59 | 842.59       | 2 |
| in vitro | 137   | 150  | SMSDESmESYNDEK                          | M7 Oxidation                            | 100%               | 115.97             | 100.0%                  | 1666.60 | 834.51       | 2 |
| in vitro | 147   | 157  | NDEKSVNASAL                             |                                         |                    |                    | 100.0%                  | 1146.55 | 574.54       | 2 |
| in vitro | 147   | 157  | NDEKSVNASAL                             |                                         |                    |                    | 100.0%                  | 1146.55 | 574.48       | 2 |
| in vitro | 151   | 158  | SVNASALR                                |                                         |                    |                    | 98.0%                   | 816.45  | 409.11       | 2 |
| in vitro | 151   | 158  | SVNASALR                                |                                         |                    |                    | 92.4%                   | 816.45  | 409.62       | 2 |
| in vitro | 151   | 158  | SVNASALR                                |                                         |                    |                    | 93.6%                   | 816.45  | 409.45       | 2 |
| in vitro | 151   | 158  | SVNASALR                                |                                         |                    |                    | 96.1%                   | 816.45  | 409.46       | 2 |
| in vitro | 151   | 158  | SVNASALR                                |                                         |                    |                    | 97.9%                   | 816.45  | 409.51       | 2 |
| in vitro | 151   | 158  | SVNASALR                                |                                         |                    |                    | 97.5%                   | 816.45  | 409.24       | 2 |
| in vitro | 151   | 158  | SVNASALR                                |                                         |                    |                    | 86.2%                   | 816.45  | 409.47       | 2 |
| in vitro | 151   | 158  | SVNASALR                                |                                         |                    |                    | 98.1%                   | 816.45  | 409.28       | 2 |
| in vitro | 151   | 158  | SVNASALR                                |                                         |                    |                    | 72.9%                   | 816.45  | 409.49       | 2 |
| in vitro | 151   | 158  | SVNASALR                                |                                         |                    |                    | 100.0%                  | 816.45  | 409.52       | 2 |
| in vitro | 151   | 158  | SVNASALR                                |                                         |                    |                    | 50.2%                   | 816.45  | 409.33       | 2 |
| in vitro | 166   | 177  | SmEmAYAQLSAK                            | M2 Oxidation, M4 Oxidation              | 100%, 100%         | 1,000.00, 1,000.00 | 100.0%                  | 1360.60 | 681.54       | 2 |
| in vitro | 166   | 177  | SmEmAYAQLSAK                            | M2 Oxidation, M4 Oxidation              | 100%, 100%         | 1,000.00, 1,000.00 | 100.0%                  | 1360.60 | 681.58       | 2 |

Table S2

| Where    | Start | Stop | Peptide Sequence | Variable Modifications     | Localization Prob. | Ascore             | Scaffold: Peptide Prob. | Mass    | Observed m/z | z |
|----------|-------|------|------------------|----------------------------|--------------------|--------------------|-------------------------|---------|--------------|---|
| in vitro | 166   | 177  | SmEmAYAQLSAK     | M2 Oxidation, M4 Oxidation | 100%, 100%         | 1,000.00, 1,000.00 | 100.0%                  | 1360.60 | 681.52       | 2 |
| in vitro | 166   | 177  | SmEmAYAQLSAK     | M2 Oxidation, M4 Oxidation | 100%, 100%         | 1,000.00, 1,000.00 | 100.0%                  | 1360.60 | 681.57       | 2 |
| in vitro | 166   | 177  | SmEmAYAQLSAK     | M2 Oxidation, M4 Oxidation | 100%, 100%         | 1,000.00, 1,000.00 | 100.0%                  | 1360.60 | 681.59       | 2 |
| in vitro | 166   | 177  | SmEmAYAQLSAK     | M2 Oxidation, M4 Oxidation | 100%, 100%         | 1,000.00, 1,000.00 | 100.0%                  | 1360.60 | 681.56       | 2 |
| in vitro | 166   | 177  | SmEmAYAQLSAK     | M2 Oxidation, M4 Oxidation | 100%, 100%         | 1,000.00, 1,000.00 | 100.0%                  | 1360.60 | 681.67       | 2 |
| in vitro | 166   | 177  | SmEmAYAQLSAK     | M2 Oxidation, M4 Oxidation | 100%, 100%         | 1,000.00, 1,000.00 | 100.0%                  | 1360.60 | 681.57       | 2 |
| in vitro | 166   | 177  | SmEmAYAQLSAK     | M2 Oxidation, M4 Oxidation | 100%, 100%         | 1,000.00, 1,000.00 | 100.0%                  | 1360.60 | 681.55       | 2 |
| in vitro | 166   | 177  | SmEmAYAQLSAK     | M2 Oxidation, M4 Oxidation | 100%, 100%         | 1,000.00, 1,000.00 | 100.0%                  | 1360.60 | 681.55       | 2 |
| in vitro | 166   | 177  | SmEmAYAQLSAK     | M2 Oxidation, M4 Oxidation | 100%, 100%         | 1,000.00, 1,000.00 | 100.0%                  | 1360.60 | 682.10       | 2 |
| in vitro | 166   | 177  | SmEmAYAQLSAK     | M2 Oxidation, M4 Oxidation | 100%, 100%         | 1,000.00, 1,000.00 | 99.9%                   | 1360.60 | 681.78       | 2 |
| in vitro | 166   | 177  | SmEmAYAQLSAK     | M2 Oxidation, M4 Oxidation | 100%, 100%         | 1,000.00, 1,000.00 | 96.9%                   | 1360.60 | 682.22       | 2 |
| in vitro | 166   | 177  | SMEemAYAQLSAK    | M4 Oxidation               | 100%               | 52.04              | 100.0%                  | 1344.61 | 673.64       | 2 |
| in vitro | 166   | 177  | SMEemAYAQLSAK    | M4 Oxidation               | 100%               | 52.04              | 100.0%                  | 1344.61 | 673.36       | 2 |
| in vitro | 166   | 177  | SmEMAYAQLSAK     | M2 Oxidation               | 100%               | 67.96              | 100.0%                  | 1344.61 | 673.65       | 2 |
| in vitro | 166   | 177  | SMEemAYAQLSAK    |                            |                    |                    | 100.0%                  | 1328.61 | 665.75       | 2 |
| in vitro | 166   | 177  | SMEemAYAQLSAK    |                            |                    |                    | 100.0%                  | 1328.61 | 666.23       | 2 |
| in vitro | 166   | 177  | SMEemAYAQLSAK    |                            |                    |                    | 96.4%                   | 1328.61 | 666.03       | 2 |
| in vitro | 166   | 177  | SMEemAYAQLSAK    |                            |                    |                    | 100.0%                  | 1328.61 | 666.30       | 2 |
| in vitro | 166   | 177  | SmEmAYAQLSAK     | M2 Oxidation, M4 Oxidation | 100%, 100%         | 1,000.00, 1,000.00 | 100.0%                  | 1360.60 | 681.70       | 2 |
| in vitro | 166   | 177  | SmEmAYAQLSAK     | M2 Oxidation, M4 Oxidation | 100%, 100%         | 1,000.00, 1,000.00 | 100.0%                  | 1360.60 | 681.62       | 2 |
| in vitro | 166   | 177  | SMEemAYAQLSAK    |                            |                    |                    | 99.1%                   | 1328.61 | 666.39       | 2 |
| in vitro | 166   | 177  | SMEemAYAQLSAK    |                            |                    |                    | 99.7%                   | 1328.61 | 665.10       | 2 |
| in vitro | 166   | 177  | SMEemAYAQLSAK    |                            |                    |                    | 99.9%                   | 1328.61 | 666.33       | 2 |
| in vitro | 166   | 177  | SMEemAYAQLSAK    |                            |                    |                    | 100.0%                  | 1328.61 | 665.90       | 2 |
| in vitro | 166   | 177  | SmEmAYAQLSAK     | M2 Oxidation, M4 Oxidation | 100%, 100%         | 1,000.00, 1,000.00 | 100.0%                  | 1360.60 | 681.62       | 2 |
| in vitro | 166   | 177  | SmEmAYAQLSAK     | M2 Oxidation, M4 Oxidation | 100%, 100%         | 1,000.00, 1,000.00 | 93.9%                   | 1360.60 | 682.01       | 2 |
| in vitro | 175   | 183  | SAKVIPSPS        |                            |                    |                    | 100.0%                  | 884.50  | 443.27       | 2 |
| in vitro | 175   | 183  | SAKVIPSPS        |                            |                    |                    | 77.1%                   | 884.50  | 443.53       | 2 |
| in vitro | 196   | 207  | IAmLEESLEVER     | M3 Oxidation               | 100%               | 1,000.00           | 100.0%                  | 1433.71 | 718.11       | 2 |
| in vitro | 196   | 207  | IAmLEESLEVER     | M3 Oxidation               | 100%               | 1,000.00           | 100.0%                  | 1433.71 | 718.27       | 2 |
| in vitro | 196   | 207  | IAmLEESLEVER     | M3 Oxidation               | 100%               | 1,000.00           | 100.0%                  | 1433.71 | 718.49       | 2 |
| in vitro | 196   | 207  | IAmLEESLEVER     | M3 Oxidation               | 100%               | 1,000.00           | 100.0%                  | 1433.71 | 718.15       | 2 |
| in vitro | 196   | 207  | IAmLEESLEVER     | M3 Oxidation               | 100%               | 1,000.00           | 100.0%                  | 1433.71 | 717.85       | 2 |
| in vitro | 196   | 207  | IAmLEESLEVER     | M3 Oxidation               | 100%               | 1,000.00           | 100.0%                  | 1433.71 | 718.18       | 2 |
| in vitro | 196   | 207  | IAmLEESLEVER     | M3 Oxidation               | 100%               | 1,000.00           | 100.0%                  | 1433.71 | 718.08       | 2 |
| in vitro | 196   | 207  | IAmLEESLEVER     | M3 Oxidation               | 100%               | 1,000.00           | 100.0%                  | 1433.71 | 718.05       | 2 |
| in vitro | 196   | 207  | IAmLEESLEVER     | M3 Oxidation               | 100%               | 1,000.00           | 100.0%                  | 1433.71 | 718.10       | 2 |
| in vitro | 196   | 207  | IAmLEESLEVER     | M3 Oxidation               | 100%               | 1,000.00           | 100.0%                  | 1433.71 | 718.03       | 2 |
| in vitro | 196   | 207  | IAmLEESLEVER     | M3 Oxidation               | 100%               | 1,000.00           | 100.0%                  | 1433.71 | 718.12       | 2 |
| in vitro | 196   | 207  | IAmLEESLEVER     | M3 Oxidation               | 100%               | 1,000.00           | 100.0%                  | 1433.71 | 718.14       | 2 |
| in vitro | 196   | 207  | IAmLEESLEVER     | M3 Oxidation               | 100%               | 1,000.00           | 100.0%                  | 1433.71 | 717.90       | 2 |
| in vitro | 196   | 207  | IAmLEESLEVER     | M3 Oxidation               | 100%               | 1,000.00           | 100.0%                  | 1433.71 | 717.77       | 2 |
| in vitro | 196   | 207  | IAmLEESLEVER     | M3 Oxidation               | 100%               | 1,000.00           | 100.0%                  | 1433.71 | 717.77       | 2 |
| in vitro | 196   | 207  | IAmLEESLEVER     | M3 Oxidation               | 100%               | 1,000.00           | 100.0%                  | 1433.71 | 717.93       | 2 |
| in vitro | 196   | 207  | IAmLEESLEVER     | M3 Oxidation               | 100%               | 1,000.00           | 100.0%                  | 1433.71 | 718.04       | 2 |
| in vitro | 196   | 207  | IAmLEESLEVER     | M3 Oxidation               | 100%               | 1,000.00           | 100.0%                  | 1433.71 | 718.17       | 2 |
| in vitro | 196   | 207  | IAmLEESLEVER     | M3 Oxidation               | 100%               | 1,000.00           | 100.0%                  | 1433.71 | 717.67       | 2 |
| in vitro | 196   | 207  | IAmLEESLEVER     | M3 Oxidation               | 100%               | 1,000.00           | 99.3%                   | 1433.71 | 718.56       | 2 |
| in vitro | 196   | 207  | IAmLEESLEVER     | M3 Oxidation               | 100%               | 1,000.00           | 100.0%                  | 1433.71 | 717.50       | 2 |
| in vitro | 196   | 207  | IAmLEESLEVER     | M3 Oxidation               | 100%               | 1,000.00           | 100.0%                  | 1433.71 | 718.17       | 2 |
| in vitro | 196   | 207  | IAmLEESLEVER     | M3 Oxidation               | 100%               | 1,000.00           | 100.0%                  | 1433.71 | 718.14       | 2 |
| in vitro | 196   | 207  | IAmLEESLEVER     | M3 Oxidation               | 100%               | 1,000.00           | 100.0%                  | 1433.71 | 718.19       | 2 |
| in vitro | 196   | 207  | IAmLEESLEVER     | M3 Oxidation               | 100%               | 1,000.00           | 100.0%                  | 1433.71 | 718.26       | 2 |
| in vitro | 196   | 207  | IAmLEESLEVER     | M3 Oxidation               | 100%               | 1,000.00           | 100.0%                  | 1433.71 | 718.13       | 2 |
| in vitro | 196   | 207  | IAmLEESLEVER     | M3 Oxidation               | 100%               | 1,000.00           | 91.7%                   | 1433.71 | 718.65       | 2 |
| in vitro | 196   | 207  | IAmLEESLEVER     | M3 Oxidation               | 100%               | 1,000.00           | 98.7%                   | 1433.71 | 718.48       | 2 |
| in vitro | 196   | 207  | IAmLEESLEVER     | M3 Oxidation               | 100%               | 1,000.00           | 100.0%                  | 1433.71 | 479.26       | 3 |

Table S2



| Where    | Start | Stop | Peptide Sequence    | Variable Modifications | Localization Prob. | Ascore   | Scaffold: Peptide Prob. | Mass    | Observed m/z | Z |
|----------|-------|------|---------------------|------------------------|--------------------|----------|-------------------------|---------|--------------|---|
| in vitro | 196   | 207  | IAMLEESLEVER        | M3 Oxidation           | 100%               | 1,000.00 | 100.0%                  | 1433.71 | 718.20       | 2 |
| in vitro | 196   | 207  | IAMLEESLEVER        | M3 Oxidation           | 100%               | 1,000.00 | 100.0%                  | 1433.71 | 718.41       | 2 |
| in vitro | 196   | 207  | IAMLEESLEVER        | M3 Oxidation           | 100%               | 1,000.00 | 100.0%                  | 1433.71 | 718.64       | 2 |
| in vitro | 196   | 207  | IAMLEESLEVER        |                        |                    |          | 100.0%                  | 1417.71 | 710.39       | 2 |
| in vitro | 196   | 207  | IAMLEESLEVER        | M3 Oxidation           | 100%               | 1,000.00 | 100.0%                  | 1433.71 | 718.28       | 2 |
| in vitro | 196   | 207  | IAMLEESLEVER        |                        |                    |          | 100.0%                  | 1417.71 | 710.68       | 2 |
| in vitro | 196   | 207  | IAMLEESLEVER        |                        |                    |          | 100.0%                  | 1417.71 | 710.24       | 2 |
| in vitro | 196   | 207  | IAMLEESLEVER        |                        |                    |          | 100.0%                  | 1417.71 | 710.21       | 2 |
| in vitro | 196   | 207  | IAMLEESLEVER        | M3 Oxidation           | 100%               | 1,000.00 | 100.0%                  | 1433.71 | 718.25       | 2 |
| in vitro | 196   | 207  | IAMLEESLEVER        |                        |                    |          | 100.0%                  | 1417.71 | 710.83       | 2 |
| in vitro | 196   | 207  | IAMLEESLEVER        | M3 Oxidation           | 100%               | 1,000.00 | 100.0%                  | 1433.71 | 718.26       | 2 |
| in vitro | 196   | 207  | IAMLEESLEVER        | M3 Oxidation           | 100%               | 1,000.00 | 100.0%                  | 1433.71 | 718.23       | 2 |
| in vitro | 196   | 207  | IAMLEESLEVER        | M3 Oxidation           | 100%               | 1,000.00 | 100.0%                  | 1433.71 | 718.27       | 2 |
| in vitro | 196   | 207  | IAMLEESLEVER        |                        |                    |          | 100.0%                  | 1417.71 | 710.73       | 2 |
| in vitro | 196   | 207  | IAMLEESLEVER        |                        |                    |          | 100.0%                  | 1417.71 | 709.71       | 2 |
| in vitro | 196   | 207  | IAMLEESLEVER        |                        |                    |          | 100.0%                  | 1417.71 | 709.92       | 2 |
| in vitro | 196   | 207  | IAMLEESLEVER        |                        |                    |          | 100.0%                  | 1417.71 | 710.27       | 2 |
| in vitro | 196   | 207  | IAMLEESLEVER        | M3 Oxidation           | 100%               | 1,000.00 | 100.0%                  | 1433.71 | 718.30       | 2 |
| in vitro | 196   | 207  | IAMLEESLEVER        |                        |                    |          | 100.0%                  | 1417.71 | 710.55       | 2 |
| in vitro | 196   | 207  | IAMLEESLEVER        |                        |                    |          | 100.0%                  | 1417.71 | 710.26       | 2 |
| in vitro | 196   | 207  | IAMLEESLEVER        | M3 Oxidation           | 100%               | 1,000.00 | 100.0%                  | 1433.71 | 718.34       | 2 |
| in vitro | 196   | 207  | IAMLEESLEVER        | M3 Oxidation           | 100%               | 1,000.00 | 100.0%                  | 1433.71 | 718.92       | 2 |
| in vitro | 196   | 207  | IAMLEESLEVER        | M3 Oxidation           | 100%               | 1,000.00 | 100.0%                  | 1433.71 | 718.46       | 2 |
| in vitro | 196   | 207  | IAMLEESLEVER        | M3 Oxidation           | 100%               | 1,000.00 | 100.0%                  | 1433.71 | 718.06       | 2 |
| in vitro | 196   | 207  | IAMLEESLEVER        |                        |                    |          | 100.0%                  | 1417.71 | 710.08       | 2 |
| in vitro | 196   | 207  | IAMLEESLEVER        | M3 Oxidation           | 100%               | 1,000.00 | 100.0%                  | 1433.71 | 718.30       | 2 |
| in vitro | 196   | 207  | IAMLEESLEVER        |                        |                    |          | 100.0%                  | 1417.71 | 710.21       | 2 |
| in vitro | 196   | 207  | IAMLEESLEVER        |                        |                    |          | 100.0%                  | 1417.71 | 710.74       | 2 |
| in vitro | 196   | 207  | IAMLEESLEVER        |                        |                    |          | 100.0%                  | 1417.71 | 709.94       | 2 |
| in vitro | 196   | 207  | IAMLEESLEVER        | M3 Oxidation           | 100%               | 1,000.00 | 100.0%                  | 1433.71 | 718.27       | 2 |
| in vitro | 196   | 207  | IAMLEESLEVER        |                        |                    |          | 100.0%                  | 1417.71 | 710.42       | 2 |
| in vitro | 196   | 207  | IAMLEESLEVER        | M3 Oxidation           | 100%               | 1,000.00 | 100.0%                  | 1433.71 | 718.21       | 2 |
| in vitro | 196   | 207  | IAMLEESLEVER        |                        |                    |          | 100.0%                  | 1417.71 | 710.79       | 2 |
| in vitro | 196   | 207  | IAMLEESLEVER        |                        |                    |          | 61.8%                   | 1417.71 | 710.18       | 2 |
| in vitro | 196   | 207  | IAMLEESLEVER        | M3 Oxidation           | 100%               | 1,000.00 | 99.2%                   | 1433.71 | 718.79       | 2 |
| in vitro | 196   | 207  | IAMLEESLEVER        | M3 Oxidation           | 100%               | 1,000.00 | 100.0%                  | 1433.71 | 718.28       | 2 |
| in vitro | 196   | 207  | IAMLEESLEVER        |                        |                    |          | 100.0%                  | 1417.71 | 710.83       | 2 |
| in vitro | 196   | 207  | IAMLEESLEVER        |                        |                    |          | 99.8%                   | 1417.71 | 710.25       | 2 |
| in vitro | 196   | 207  | IAMLEESLEVER        | M3 Oxidation           | 100%               | 1,000.00 | 100.0%                  | 1433.71 | 718.22       | 2 |
| in vitro | 196   | 207  | IAMLEESLEVER        | M3 Oxidation           | 100%               | 1,000.00 | 77.8%                   | 1433.71 | 718.82       | 2 |
| in vitro | 204   | 222  | EVERSRTSELQEQFSVALR |                        |                    |          | 100.0%                  | 2263.16 | 754.72       | 3 |
| in vitro | 204   | 222  | EVERSRTSELQEQFSVALR |                        |                    |          | 100.0%                  | 2263.16 | 754.65       | 3 |
| in vitro | 204   | 222  | EVERSRTSELQEQFSVALR |                        |                    |          | 100.0%                  | 2263.16 | 754.61       | 3 |
| in vitro | 204   | 222  | EVERSRTSELQEQFSVALR |                        |                    |          | 100.0%                  | 2263.16 | 754.74       | 3 |
| in vitro | 204   | 222  | EVERSRTSELQEQFSVALR |                        |                    |          | 88.7%                   | 2263.16 | 754.64       | 3 |
| in vitro | 204   | 222  | EVERSRTSELQEQFSVALR |                        |                    |          | 100.0%                  | 2263.16 | 754.60       | 3 |
| in vitro | 204   | 222  | EVERSRTSELQEQFSVALR |                        |                    |          | 99.5%                   | 2263.16 | 755.16       | 3 |
| in vitro | 204   | 222  | EVERSRTSELQEQFSVALR |                        |                    |          | 99.9%                   | 2263.16 | 754.60       | 3 |
| in vitro | 204   | 222  | EVERSRTSELQEQFSVALR |                        |                    |          | 96.7%                   | 2263.16 | 754.72       | 3 |
| in vitro | 204   | 222  | EVERSRTSELQEQFSVALR |                        |                    |          | 74.1%                   | 2263.16 | 754.77       | 3 |
| in vitro | 204   | 222  | EVERSRTSELQEQFSVALR |                        |                    |          | 87.5%                   | 2263.16 | 754.66       | 3 |
| in vitro | 204   | 222  | EVERSRTSELQEQFSVALR |                        |                    |          | 99.4%                   | 2263.16 | 755.12       | 3 |
| in vitro | 204   | 222  | EVERSRTSELQEQFSVALR |                        |                    |          | 51.5%                   | 2263.16 | 754.71       | 3 |
| in vitro | 204   | 222  | EVERSRTSELQEQFSVALR |                        |                    |          | 68.3%                   | 2263.16 | 754.67       | 3 |
| in vitro | 204   | 222  | EVERSRTSELQEQFSVALR |                        |                    |          | 92.5%                   | 2263.16 | 754.64       | 3 |
| in vitro | 204   | 222  | EVERSRTSELQEQFSVALR |                        |                    |          | 100.0%                  | 2263.16 | 755.09       | 3 |
| in vitro | 204   | 222  | EVERSRTSELQEQFSVALR |                        |                    |          | 100.0%                  | 2263.16 | 754.69       | 3 |
| in vitro | 204   | 222  | EVERSRTSELQEQFSVALR |                        |                    |          | 65.3%                   | 2263.16 | 754.70       | 3 |

| Where    | Start | Stop | Peptide Sequence    | Variable Modifications | Localization Prob. | Ascore | Scaffold: Peptide Prob. | Mass    | Observed m/z | Z |
|----------|-------|------|---------------------|------------------------|--------------------|--------|-------------------------|---------|--------------|---|
| in vitro | 204   | 222  | EVERSRTSELQEQFSVALR |                        |                    |        | 100.0%                  | 2263.16 | 754.66       | 3 |
| in vitro | 204   | 222  | EVERSRTSELQEQFSVALR |                        |                    |        | 59.0%                   | 2263.16 | 754.73       | 3 |
| in vitro | 204   | 222  | EVERSRTSELQEQFSVALR |                        |                    |        | 99.6%                   | 2263.16 | 754.73       | 3 |
| in vitro | 204   | 222  | EVERSRTSELQEQFSVALR |                        |                    |        | 82.2%                   | 2263.16 | 754.68       | 3 |
| in vitro | 204   | 222  | EVERSRTSELQEQFSVALR |                        |                    |        | 93.0%                   | 2263.16 | 754.65       | 3 |
| in vitro | 204   | 222  | EVERSRTSELQEQFSVALR |                        |                    |        | 61.7%                   | 2263.16 | 754.63       | 3 |
| in vitro | 204   | 222  | EVERSRTSELQEQFSVALR |                        |                    |        | 58.0%                   | 2263.16 | 754.69       | 3 |
| in vitro | 210   | 222  | TSELQEQFSVALR       |                        |                    |        | 100.0%                  | 1506.77 | 754.67       | 2 |
| in vitro | 210   | 222  | TSELQEQFSVALR       |                        |                    |        | 100.0%                  | 1506.77 | 754.64       | 2 |
| in vitro | 210   | 222  | TSELQEQFSVALR       |                        |                    |        | 100.0%                  | 1506.77 | 754.72       | 2 |
| in vitro | 210   | 222  | TSELQEQFSVALR       |                        |                    |        | 100.0%                  | 1506.77 | 754.77       | 2 |
| in vitro | 210   | 222  | TSELQEQFSVALR       |                        |                    |        | 100.0%                  | 1506.77 | 754.61       | 2 |
| in vitro | 210   | 222  | TSELQEQFSVALR       |                        |                    |        | 100.0%                  | 1506.77 | 754.60       | 2 |
| in vitro | 210   | 222  | TSELQEQFSVALR       |                        |                    |        | 100.0%                  | 1506.77 | 754.59       | 2 |
| in vitro | 210   | 222  | TSELQEQFSVALR       |                        |                    |        | 100.0%                  | 1506.77 | 754.66       | 2 |
| in vitro | 210   | 222  | TSELQEQFSVALR       |                        |                    |        | 100.0%                  | 1506.77 | 754.74       | 2 |
| in vitro | 210   | 222  | TSELQEQFSVALR       |                        |                    |        | 100.0%                  | 1506.77 | 754.68       | 2 |
| in vitro | 210   | 222  | TSELQEQFSVALR       |                        |                    |        | 100.0%                  | 1506.77 | 754.69       | 2 |
| in vitro | 210   | 222  | TSELQEQFSVALR       |                        |                    |        | 100.0%                  | 1506.77 | 754.64       | 2 |
| in vitro | 210   | 222  | TSELQEQFSVALR       |                        |                    |        | 100.0%                  | 1506.77 | 754.28       | 2 |
| in vitro | 210   | 222  | TSELQEQFSVALR       |                        |                    |        | 100.0%                  | 1506.77 | 754.65       | 2 |
| in vitro | 210   | 222  | TSELQEQFSVALR       |                        |                    |        | 99.7%                   | 1506.77 | 755.17       | 2 |
| in vitro | 210   | 222  | TSELQEQFSVALR       |                        |                    |        | 100.0%                  | 1506.77 | 754.44       | 2 |
| in vitro | 210   | 222  | TSELQEQFSVALR       |                        |                    |        | 100.0%                  | 1506.77 | 755.09       | 2 |
| in vitro | 210   | 222  | TSELQEQFSVALR       |                        |                    |        | 100.0%                  | 1506.77 | 754.37       | 2 |
| in vitro | 210   | 222  | TSELQEQFSVALR       |                        |                    |        | 100.0%                  | 1506.77 | 755.18       | 2 |
| in vitro | 210   | 222  | TSELQEQFSVALR       |                        |                    |        | 100.0%                  | 1506.77 | 754.68       | 2 |
| in vitro | 210   | 222  | TSELQEQFSVALR       |                        |                    |        | 100.0%                  | 1506.77 | 754.23       | 2 |
| in vitro | 210   | 222  | TSELQEQFSVALR       |                        |                    |        | 100.0%                  | 1506.77 | 754.51       | 2 |
| in vitro | 210   | 222  | TSELQEQFSVALR       |                        |                    |        | 100.0%                  | 1506.77 | 754.73       | 2 |
| in vitro | 210   | 222  | TSELQEQFSVALR       |                        |                    |        | 100.0%                  | 1506.77 | 754.70       | 2 |
| in vitro | 210   | 222  | TSELQEQFSVALR       |                        |                    |        | 100.0%                  | 1506.77 | 754.63       | 2 |
| in vitro | 210   | 222  | TSELQEQFSVALR       |                        |                    |        | 100.0%                  | 1506.77 | 755.12       | 2 |
| in vitro | 210   | 222  | TSELQEQFSVALR       |                        |                    |        | 100.0%                  | 1506.77 | 755.20       | 2 |
| in vitro | 210   | 222  | TSELQEQFSVALR       |                        |                    |        | 100.0%                  | 1506.77 | 754.60       | 2 |
| in vitro | 210   | 222  | TSELQEQFSVALR       |                        |                    |        | 100.0%                  | 1506.77 | 754.37       | 2 |
| in vitro | 210   | 222  | TSELQEQFSVALR       |                        |                    |        | 100.0%                  | 1506.77 | 755.21       | 2 |
| in vitro | 210   | 222  | TSELQEQFSVALR       |                        |                    |        | 100.0%                  | 1506.77 | 754.37       | 2 |
| in vitro | 210   | 222  | TSELQEQFSVALR       |                        |                    |        | 100.0%                  | 1506.77 | 755.14       | 2 |
| in vitro | 210   | 222  | TSELQEQFSVALR       |                        |                    |        | 100.0%                  | 1506.77 | 754.71       | 2 |
| in vitro | 210   | 222  | TSELQEQFSVALR       |                        |                    |        | 100.0%                  | 1506.77 | 754.31       | 2 |
| in vitro | 210   | 222  | TSELQEQFSVALR       |                        |                    |        | 100.0%                  | 1506.77 | 755.16       | 2 |
| in vitro | 210   | 222  | TSELQEQFSVALR       |                        |                    |        | 100.0%                  | 1506.77 | 754.67       | 2 |
| in vitro | 210   | 222  | TSELQEQFSVALR       |                        |                    |        | 100.0%                  | 1506.77 | 754.23       | 2 |
| in vitro | 210   | 222  | TSELQEQFSVALR       |                        |                    |        | 100.0%                  | 1506.77 | 754.69       | 2 |
| in vitro | 210   | 222  | TSELQEQFSVALR       |                        |                    |        | 100.0%                  | 1506.77 | 754.72       | 2 |
| in vitro | 210   | 222  | TSELQEQFSVALR       |                        |                    |        | 99.9%                   | 1506.77 | 755.25       | 2 |
| in vitro | 210   | 222  | TSELQEQFSVALR       |                        |                    |        | 100.0%                  | 1506.77 | 754.72       | 2 |
| in vitro | 210   | 222  | TSELQEQFSVALR       |                        |                    |        | 99.1%                   | 1506.77 | 754.73       | 2 |
| in vitro | 210   | 222  | TSELQEQFSVALR       |                        |                    |        | 100.0%                  | 1506.77 | 755.12       | 2 |
| in vitro | 210   | 222  | TSELQEQFSVALR       |                        |                    |        | 100.0%                  | 1506.77 | 754.66       | 2 |
| in vitro | 210   | 222  | TSELQEQFSVALR       |                        |                    |        | 100.0%                  | 1506.77 | 755.06       | 2 |
| in vitro | 210   | 222  | TSELQEQFSVALR       |                        |                    |        | 100.0%                  | 1506.77 | 754.65       | 2 |
| in vitro | 210   | 222  | TSELQEQFSVALR       |                        |                    |        | 92.4%                   | 1506.77 | 754.67       | 2 |
| in vitro | 210   | 222  | TSELQEQFSVALR       |                        |                    |        | 100.0%                  | 1506.77 | 754.64       | 2 |
| in vitro | 210   | 222  | TSELQEQFSVALR       |                        |                    |        | 100.0%                  | 1506.77 | 755.12       | 2 |
| in vitro | 210   | 222  | TSELQEQFSVALR       |                        |                    |        | 100.0%                  | 1506.77 | 754.64       | 2 |
| in vitro | 210   | 222  | TSELQEQFSVALR       |                        |                    |        | 100.0%                  | 1506.77 | 755.09       | 2 |

| Where    | Start | Stop | Peptide Sequence | Variable Modifications                         | Localization Prob. | Ascore                       | Scaffold: Peptide Prob. | Mass    | Observed m/z | Z |
|----------|-------|------|------------------|------------------------------------------------|--------------------|------------------------------|-------------------------|---------|--------------|---|
| in vitro | 210   | 222  | TSELQEQFSVALR    |                                                |                    |                              | 93.7%                   | 1506.77 | 754.65       | 2 |
| in vitro | 210   | 222  | TSELQEQFSVALR    |                                                |                    |                              | 100.0%                  | 1506.77 | 503.62       | 3 |
| in vitro | 210   | 222  | TSELQEQFSVALR    |                                                |                    |                              | 100.0%                  | 1506.77 | 755.31       | 2 |
| in vitro | 210   | 222  | TSELQEQFSVALR    |                                                |                    |                              | 100.0%                  | 1506.77 | 754.57       | 2 |
| in vitro | 210   | 222  | TSELQEQFSVALR    |                                                |                    |                              | 100.0%                  | 1506.77 | 754.76       | 2 |
| in vitro | 210   | 222  | TSELQEQFSVALR    |                                                |                    |                              | 100.0%                  | 1506.77 | 754.52       | 2 |
| in vitro | 210   | 222  | TSELQEQFSVALR    |                                                |                    |                              | 100.0%                  | 1506.77 | 754.57       | 2 |
| in vitro | 210   | 222  | TSELQEQFSVALR    |                                                |                    |                              | 100.0%                  | 1506.77 | 754.83       | 2 |
| in vitro | 210   | 222  | TSELQEQFSVALR    |                                                |                    |                              | 100.0%                  | 1506.77 | 755.26       | 2 |
| in vitro | 210   | 222  | TSELQEQFSVALR    |                                                |                    |                              | 99.9%                   | 1506.77 | 755.41       | 2 |
| in vitro | 210   | 222  | TSELQEQFSVALR    |                                                |                    |                              | 100.0%                  | 1506.77 | 754.75       | 2 |
| in vitro | 210   | 222  | TSELQEQFSVALR    |                                                |                    |                              | 100.0%                  | 1506.77 | 503.46       | 3 |
| in vitro | 210   | 222  | TSELQEQFSVALR    |                                                |                    |                              | 100.0%                  | 1506.77 | 754.81       | 2 |
| in vitro | 210   | 222  | TSELQEQFSVALR    |                                                |                    |                              | 100.0%                  | 1506.77 | 754.82       | 2 |
| in vitro | 210   | 222  | TSELQEQFSVALR    |                                                |                    |                              | 100.0%                  | 1506.77 | 754.44       | 2 |
| in vitro | 210   | 222  | TSELQEQFSVALR    |                                                |                    |                              | 100.0%                  | 1506.77 | 755.27       | 2 |
| in vitro | 210   | 222  | TSELQEQFSVALR    |                                                |                    |                              | 100.0%                  | 1506.77 | 754.77       | 2 |
| in vitro | 210   | 222  | TSELQEQFSVALR    |                                                |                    |                              | 100.0%                  | 1506.77 | 754.75       | 2 |
| in vitro | 210   | 222  | TSELQEQFSVALR    |                                                |                    |                              | 72.0%                   | 1506.77 | 755.27       | 2 |
| in vitro | 210   | 222  | TSELQEQFSVALR    |                                                |                    |                              | 100.0%                  | 1506.77 | 754.74       | 2 |
| in vitro | 210   | 222  | TSELQEQFSVALR    |                                                |                    |                              | 100.0%                  | 1506.77 | 754.85       | 2 |
| in vitro | 210   | 222  | TSELQEQFSVALR    |                                                |                    |                              | 100.0%                  | 1506.77 | 754.81       | 2 |
| in vitro | 210   | 222  | TSELQEQFSVALR    |                                                |                    |                              | 100.0%                  | 1506.77 | 754.84       | 2 |
| in vitro | 210   | 222  | TSELQEQFSVALR    |                                                |                    |                              | 100.0%                  | 1506.77 | 754.90       | 2 |
| in vitro | 210   | 222  | TSELQEQFSVALR    |                                                |                    |                              | 100.0%                  | 1506.77 | 755.02       | 2 |
| in vitro | 210   | 222  | TSELQEQFSVALR    |                                                |                    |                              | 100.0%                  | 1506.77 | 754.76       | 2 |
| in vitro | 210   | 222  | TSELQEQFSVALR    |                                                |                    |                              | 100.0%                  | 1506.77 | 754.77       | 2 |
| in vitro | 210   | 222  | TSELQEQFSVALR    |                                                |                    |                              | 100.0%                  | 1506.77 | 754.77       | 2 |
| in vitro | 210   | 222  | TSELQEQFSVALR    |                                                |                    |                              | 100.0%                  | 1506.77 | 754.75       | 2 |
| in vitro | 210   | 222  | TSELQEQFSVALR    |                                                |                    |                              | 100.0%                  | 1506.77 | 754.60       | 2 |
| in vitro | 210   | 222  | TSELQEQFSVALR    |                                                |                    |                              | 100.0%                  | 1506.77 | 754.96       | 2 |
| in vitro | 210   | 222  | TSELQEQFSVALR    |                                                |                    |                              | 100.0%                  | 1506.77 | 754.79       | 2 |
| in vitro | 210   | 222  | TSELQEQFSVALR    |                                                |                    |                              | 100.0%                  | 1506.77 | 754.59       | 2 |
| in vitro | 210   | 222  | TSELQEQFSVALR    |                                                |                    |                              | 100.0%                  | 1506.77 | 754.86       | 2 |
| in vitro | 210   | 222  | TSELQEQFSVALR    |                                                |                    |                              | 100.0%                  | 1506.77 | 503.83       | 3 |
| in vitro | 210   | 222  | TSELQEQFSVALR    |                                                |                    |                              | 100.0%                  | 1506.77 | 503.86       | 3 |
| in vitro | 210   | 222  | TSELQEQFSVALR    |                                                |                    |                              | 100.0%                  | 1506.77 | 754.77       | 2 |
| in vitro | 210   | 222  | TSELQEQFSVALR    |                                                |                    |                              | 100.0%                  | 1506.77 | 754.72       | 2 |
| in vitro | 210   | 222  | TSELQEQFSVALR    |                                                |                    |                              | 100.0%                  | 1506.77 | 754.63       | 2 |
| in vitro | 210   | 222  | TSELQEQFSVALR    |                                                |                    |                              | 100.0%                  | 1506.77 | 754.74       | 2 |
| in vitro | 210   | 222  | TSELQEQFSVALR    |                                                |                    |                              | 100.0%                  | 1506.77 | 754.98       | 2 |
| in vitro | 210   | 222  | TSELQEQFSVALR    |                                                |                    |                              | 100.0%                  | 1506.77 | 754.78       | 2 |
| in vitro | 210   | 222  | TSELQEQFSVALR    |                                                |                    |                              | 100.0%                  | 1506.77 | 754.88       | 2 |
| in vitro | 210   | 222  | TSELQEQFSVALR    |                                                |                    |                              | 100.0%                  | 1506.77 | 754.25       | 2 |
| in vitro | 210   | 222  | TSELQEQFSVALR    |                                                |                    |                              | 99.1%                   | 1506.77 | 754.42       | 2 |
| in vitro | 210   | 222  | TSELQEQFSVALR    |                                                |                    |                              | 100.0%                  | 1506.77 | 754.79       | 2 |
| in vitro | 210   | 222  | TSELQEQFSVALR    |                                                |                    |                              | 99.6%                   | 1506.77 | 754.96       | 2 |
| in vitro | 210   | 222  | TSELQEQFSVALR    |                                                |                    |                              | 100.0%                  | 1506.77 | 754.38       | 2 |
| in vitro | 210   | 222  | TSELQEQFSVALR    |                                                |                    |                              | 100.0%                  | 1506.77 | 754.70       | 2 |
| in vitro | 210   | 222  | TSELQEQFSVALR    |                                                |                    |                              | 83.2%                   | 1506.77 | 754.73       | 2 |
| in vitro | 210   | 222  | TSELQEQFSVALR    |                                                |                    |                              | 54.3%                   | 1506.77 | 755.61       | 2 |
| in vitro | 232   | 236  | IVSQK            |                                                |                    |                              | 99.0%                   | 573.35  | 574.36       | 1 |
| in vitro | 237   | 249  | GmESLEImLNSmK    | M2 Oxidation, M8 Oxidation, M12 Oxidator       | 100%, 100%, 100%   | 1,000.00, 1,000.00, 1,000.00 | 100.0%                  | 1529.68 | 766.11       | 2 |
| in vitro | 237   | 249  | GmESLEImLNSmK    | M2 Oxidation, M8 Oxidation, M12 Oxidator       | 100%, 100%, 100%   | 1,000.00, 1,000.00, 1,000.00 | 100.0%                  | 1529.68 | 766.61       | 2 |
| in vitro | 237   | 249  | GmESLEImLNSmK    | M2 Oxidation, M8 Oxidation, M12 Oxidator       | 100%, 100%, 100%   | 1,000.00, 1,000.00, 1,000.00 | 100.0%                  | 1529.68 | 766.08       | 2 |
| in vitro | 237   | 249  | GmESLEImLNSmK    | M2 Oxidation, M8 Oxidation, M12 Oxidator       | 100%, 100%, 100%   | 1,000.00, 1,000.00, 1,000.00 | 100.0%                  | 1529.68 | 766.16       | 2 |
| in vitro | 237   | 248  | GmESLEImLNsM     | M2 Oxidation, M8 Oxidation, S11 Phosphorylator | 100%, 100%, 100%   | 138.38, 42.22, 110.43        | 95.7%                   | 1465.55 | 734.12       | 2 |
| in vitro | 237   | 248  | GmESLEImLNsM     | M2 Oxidation, M8 Oxidation, S11 Phosphorylator | 100%, 100%, 100%   | 122.50, 45.04, 102.29        | 75.5%                   | 1465.55 | 734.10       | 2 |

Table S2

| Where    | Start | Stop | Peptide Sequence | Variable Modifications                         | Localization Prob. | Ascore               | Scaffold: Peptide Prob. | Mass    | Observed m/z | z |
|----------|-------|------|------------------|------------------------------------------------|--------------------|----------------------|-------------------------|---------|--------------|---|
| in vitro | 237   | 248  | GmESLEImLNsM     | M2 Oxidation, M8 Oxidation, S11 Phosphorylator | 100%, 100%, 100%   | 119.04, 29.53, 93.60 | 100.0%                  | 1465.55 | 734.09       | 2 |
| in vitro | 237   | 249  | GMESLEIMLNSMK    |                                                |                    |                      | 100.0%                  | 1481.69 | 742.82       | 2 |
| in vitro | 237   | 249  | GMESLEIMLNSMK    |                                                |                    |                      | 100.0%                  | 1481.69 | 742.51       | 2 |
| in vitro | 237   | 249  | GMESLEIMLNSMK    |                                                |                    |                      | 100.0%                  | 1481.69 | 742.75       | 2 |
| in vitro | 237   | 249  | GMESLEIMLNSMK    |                                                |                    |                      | 100.0%                  | 1481.69 | 742.78       | 2 |
| in vitro | 237   | 249  | GMESLEIMLNSMK    |                                                |                    |                      | 100.0%                  | 1481.69 | 742.25       | 2 |
| in vitro | 237   | 249  | GMESLEIMLNSMK    |                                                |                    |                      | 100.0%                  | 1481.69 | 741.66       | 2 |
| in vitro | 237   | 249  | GMESLEIMLNSMK    |                                                |                    |                      | 100.0%                  | 1481.69 | 742.29       | 2 |
| in vitro | 237   | 249  | GMESLEIMLNSMK    |                                                |                    |                      | 100.0%                  | 1481.69 | 742.39       | 2 |
| in vitro | 237   | 249  | GMESLEIMLNSMK    |                                                |                    |                      | 100.0%                  | 1481.69 | 742.00       | 2 |
| in vitro | 237   | 249  | GMESLEIMLNSMK    |                                                |                    |                      | 100.0%                  | 1481.69 | 742.72       | 2 |
| in vitro | 237   | 249  | GmESLEImLNSMK    | M2 Oxidation, M8 Oxidation                     | 100%, 100%         | 235.31, 121.83       | 100.0%                  | 1513.68 | 758.32       | 2 |
| in vitro | 237   | 249  | GMESLEIMLNSMK    |                                                |                    |                      | 100.0%                  | 1481.69 | 742.72       | 2 |
| in vitro | 237   | 249  | GMESLEIMLNSMK    |                                                |                    |                      | 100.0%                  | 1481.69 | 742.15       | 2 |
| in vitro | 237   | 249  | GMESLEIMLNSMK    |                                                |                    |                      | 100.0%                  | 1481.69 | 742.15       | 2 |
| in vitro | 237   | 249  | GmESLEImLNSMK    | M2 Oxidation, M8 Oxidation                     | 100%, 100%         | 181.58, 88.98        | 100.0%                  | 1513.68 | 758.28       | 2 |
| in vitro | 237   | 249  | GMESLEIMLNSMK    |                                                |                    |                      | 100.0%                  | 1481.69 | 742.31       | 2 |
| in vitro | 237   | 249  | GMESLEIMLNSmK    | M12 Oxidation                                  | 100%               | 56.53                | 100.0%                  | 1497.69 | 500.53       | 3 |
| in vitro | 237   | 249  | GMESLEIMLNSMK    |                                                |                    |                      | 100.0%                  | 1481.69 | 741.93       | 2 |
| in vitro | 237   | 249  | GMESLEIMLNSMK    |                                                |                    |                      | 100.0%                  | 1481.69 | 495.32       | 3 |
| in vitro | 237   | 249  | GmESLEImLNSMK    | M2 Oxidation, M8 Oxidation                     | 100%, 100%         | 207.31, 111.84       | 100.0%                  | 1513.68 | 758.34       | 2 |
| in vitro | 237   | 249  | GMESLEIMLNSMK    |                                                |                    |                      | 100.0%                  | 1481.69 | 741.97       | 2 |
| in vitro | 237   | 249  | GMESLEIMLNSMK    |                                                |                    |                      | 100.0%                  | 1481.69 | 741.87       | 2 |
| in vitro | 237   | 249  | GMESLEIMLNSMK    |                                                |                    |                      | 100.0%                  | 1481.69 | 742.21       | 2 |
| in vitro | 237   | 249  | GMESLEIMLNSMK    |                                                |                    |                      | 100.0%                  | 1481.69 | 742.05       | 2 |
| in vitro | 237   | 249  | GmESLEIMLNSMK    | M2 Oxidation                                   | 100%               | 81.36                | 69.7%                   | 1497.69 | 750.34       | 2 |
| in vitro | 237   | 249  | GMESLEIMLNSmK    | M12 Oxidation                                  | 100%               | 160                  | 100.0%                  | 1497.69 | 750.32       | 2 |
| in vitro | 237   | 249  | GMESLEIMLNSmK    | M12 Oxidation                                  | 100%               | 160                  | 99.9%                   | 1497.69 | 750.19       | 2 |
| in vitro | 237   | 249  | GMESLEIMLNSMK    |                                                |                    |                      | 100.0%                  | 1481.69 | 495.40       | 3 |
| in vitro | 237   | 249  | GMESLEIMLNSmK    | M12 Oxidation                                  | 100%               | 160                  | 100.0%                  | 1497.69 | 750.17       | 2 |
| in vitro | 237   | 249  | GMESLEImLNSMK    | M8 Oxidation                                   | 100%               | 88.83                | 90.3%                   | 1497.69 | 749.88       | 2 |
| in vitro | 237   | 249  | GMESLEIMLNSMK    |                                                |                    |                      | 100.0%                  | 1481.69 | 742.11       | 2 |
| in vitro | 237   | 249  | GmESLEIMLNSMK    | M2 Oxidation                                   | 100%               | 81.36                | 100.0%                  | 1497.69 | 750.08       | 2 |
| in vitro | 237   | 249  | GMESLEIMLNSmK    | M12 Oxidation                                  | 100%               | 135.92               | 100.0%                  | 1497.69 | 750.24       | 2 |
| in vitro | 237   | 249  | GMESLEImLNSmK    | M8 Oxidation, M12 Oxidation                    | 100%, 100%         | 66.66, 158.18        | 100.0%                  | 1513.68 | 758.81       | 2 |
| in vitro | 237   | 249  | GMESLEIMLNSmK    | M12 Oxidation                                  | 100%               | 160                  | 100.0%                  | 1497.69 | 750.13       | 2 |
| in vitro | 237   | 249  | GMESLEIMLNSMK    |                                                |                    |                      | 100.0%                  | 1481.69 | 495.30       | 3 |
| in vitro | 237   | 249  | GmESLEImLNSMK    | M2 Oxidation, M8 Oxidation                     | 100%, 100%         | 126.19, 46.35        | 100.0%                  | 1513.68 | 758.27       | 2 |
| in vitro | 237   | 249  | GMESLEImLNSMK    | M8 Oxidation                                   | 100%               | 80.45                | 100.0%                  | 1497.69 | 750.38       | 2 |
| in vitro | 237   | 249  | GmESLEIMLNSMK    | M2 Oxidation                                   | 100%               | 82.63                | 100.0%                  | 1497.69 | 750.71       | 2 |
| in vitro | 237   | 249  | GMESLEIMLNSmK    | M12 Oxidation                                  | 100%               | 109.97               | 91.4%                   | 1497.69 | 750.88       | 2 |
| in vitro | 237   | 249  | GmESLEIMLNSmK    | M2 Oxidation, M12 Oxidation                    | 100%, 100%         | 63.05, 97.69         | 100.0%                  | 1513.68 | 757.75       | 2 |
| in vitro | 237   | 249  | GMESLEIMLNSMK    |                                                |                    |                      | 100.0%                  | 1481.69 | 1482.99      | 1 |
| in vitro | 237   | 249  | GMESLEIMLNSmK    | M12 Oxidation                                  | 100%               | 106.29               | 99.6%                   | 1497.69 | 750.15       | 2 |
| in vitro | 237   | 249  | GMESLEIMLNSMK    |                                                |                    |                      | 61.9%                   | 1481.69 | 495.33       | 3 |
| in vitro | 256   | 265  | MAMLEENHAR       |                                                |                    |                      | 100.0%                  | 1200.54 | 601.40       | 2 |
| in vitro | 256   | 265  | MAMLEENHAR       |                                                |                    |                      | 100.0%                  | 1200.54 | 602.40       | 2 |
| in vitro | 256   | 265  | MAMLEENHAR       |                                                |                    |                      | 100.0%                  | 1200.54 | 601.61       | 2 |
| in vitro | 256   | 265  | MAMLEENHAR       |                                                |                    |                      | 100.0%                  | 1200.54 | 601.56       | 2 |
| in vitro | 256   | 265  | MAMLEENHAR       |                                                |                    |                      | 100.0%                  | 1200.54 | 601.72       | 2 |
| in vitro | 256   | 265  | MAMLEENHAR       |                                                |                    |                      | 100.0%                  | 1200.54 | 601.68       | 2 |
| in vitro | 256   | 265  | MAMLEENHAR       |                                                |                    |                      | 100.0%                  | 1200.54 | 601.69       | 2 |
| in vitro | 256   | 265  | MAMLEENHAR       |                                                |                    |                      | 100.0%                  | 1200.54 | 601.66       | 2 |
| in vitro | 256   | 265  | mAMLEENHAR       | M1 Oxidation                                   | 100%               | 30.83                | 100.0%                  | 1216.53 | 609.64       | 2 |
| in vitro | 256   | 265  | mAMLEENHAR       | M1 Oxidation                                   | 100%               | 33.18                | 100.0%                  | 1216.53 | 609.60       | 2 |
| in vitro | 256   | 265  | mAMLEENHAR       | M1 Oxidation                                   | 100%               | 33.18                | 100.0%                  | 1216.53 | 609.58       | 2 |
| in vitro | 256   | 265  | mAMLEENHAR       | M1 Oxidation                                   | 100%               | 45.01                | 100.0%                  | 1216.53 | 609.37       | 2 |
| in vitro | 256   | 265  | mAMLEENHAR       | M1 Oxidation                                   | 99%                | 22.85                | 100.0%                  | 1216.53 | 610.14       | 2 |

Table S2

| Where    | Start | Stop | Peptide Sequence        | Variable Modifications     | Localization Prob. | Ascore             | Scaffold: Peptide Prob. | Mass    | Observed m/z | z |
|----------|-------|------|-------------------------|----------------------------|--------------------|--------------------|-------------------------|---------|--------------|---|
| in vitro | 256   | 265  | mAMLEENHAR              | M1 Oxidation               | 100%               | 26.31              | 100.0%                  | 1216.53 | 609.60       | 2 |
| in vitro | 256   | 265  | MAmLEENHAR              | M3 Oxidation               | 97%                | 14.64              | 100.0%                  | 1216.53 | 609.62       | 2 |
| in vitro | 256   | 265  | mAMLEENHAR              | M1 Oxidation               | 100%               | 27.16              | 100.0%                  | 1216.53 | 609.80       | 2 |
| in vitro | 256   | 265  | mAMLEENHAR              | M1 Oxidation               | 100%               | 26.31              | 100.0%                  | 1216.53 | 610.16       | 2 |
| in vitro | 256   | 265  | mAMLEENHAR              | M1 Oxidation               | 94%                | 12.19              | 100.0%                  | 1216.53 | 610.12       | 2 |
| in vitro | 256   | 265  | mAmLEENHAR              | M1 Oxidation, M3 Oxidation | 100%, 100%         | 1,000.00, 1,000.00 | 100.0%                  | 1232.53 | 617.47       | 2 |
| in vitro | 256   | 265  | mAMLEENHAR              | M1 Oxidation               | 100%               | 26.31              | 100.0%                  | 1216.53 | 609.55       | 2 |
| in vitro | 256   | 265  | mAmLEENHAR              | M1 Oxidation, M3 Oxidation | 100%, 100%         | 1,000.00, 1,000.00 | 100.0%                  | 1232.53 | 617.31       | 2 |
| in vitro | 256   | 265  | mAMLEENHAR              | M1 Oxidation               | 96%                | 13.67              | 100.0%                  | 1216.53 | 609.46       | 2 |
| in vitro | 256   | 265  | mAmLEENHAR              | M1 Oxidation, M3 Oxidation | 100%, 100%         | 1,000.00, 1,000.00 | 100.0%                  | 1232.53 | 617.61       | 2 |
| in vitro | 256   | 265  | mAmLEENHAR              | M1 Oxidation, M3 Oxidation | 100%, 100%         | 1,000.00, 1,000.00 | 100.0%                  | 1232.53 | 618.18       | 2 |
| in vitro | 256   | 265  | mAmLEENHAR              | M1 Oxidation, M3 Oxidation | 100%, 100%         | 1,000.00, 1,000.00 | 100.0%                  | 1232.53 | 617.66       | 2 |
| in vitro | 256   | 265  | mAmLEENHAR              | M1 Oxidation, M3 Oxidation | 100%, 100%         | 1,000.00, 1,000.00 | 100.0%                  | 1232.53 | 617.60       | 2 |
| in vitro | 256   | 265  | mAMLEENHAR              | M1 Oxidation, M3 Oxidation | 100%, 100%         | 1,000.00, 1,000.00 | 100.0%                  | 1232.53 | 618.15       | 2 |
| in vitro | 256   | 265  | mAmLEENHAR              | M1 Oxidation, M3 Oxidation | 100%, 100%         | 1,000.00, 1,000.00 | 100.0%                  | 1232.53 | 617.63       | 2 |
| in vitro | 256   | 265  | mAMLEENHAR              | M1 Oxidation               | 100%               | 23.47              | 100.0%                  | 1216.53 | 406.87       | 3 |
| in vitro | 256   | 265  | mAmLEENHAR              | M1 Oxidation, M3 Oxidation | 100%, 100%         | 1,000.00, 1,000.00 | 100.0%                  | 1232.53 | 617.59       | 2 |
| in vitro | 256   | 265  | mAMLEENHAR              | M1 Oxidation               | 100%               | 26.92              | 100.0%                  | 1216.53 | 406.65       | 3 |
| in vitro | 256   | 265  | MAMLEENHAR              |                            |                    |                    | 100.0%                  | 1200.54 | 401.63       | 3 |
| in vitro | 256   | 265  | MAmLEENHAR              | M3 Oxidation               | 100%               | 35.79              | 99.8%                   | 1216.53 | 407.02       | 3 |
| in vitro | 256   | 265  | mAmLEENHAR              | M1 Oxidation, M3 Oxidation | 100%, 100%         | 1,000.00, 1,000.00 | 99.7%                   | 1232.53 | 617.69       | 2 |
| in vitro | 256   | 265  | MAMLEENHAR              |                            |                    |                    | 99.5%                   | 1200.54 | 401.71       | 3 |
| in vitro | 256   | 265  | MAMLEENHAR              |                            |                    |                    | 99.9%                   | 1200.54 | 401.66       | 3 |
| in vitro | 256   | 265  | mAMLEENHAR              | M1 Oxidation, M3 Oxidation | 100%, 100%         | 1,000.00, 1,000.00 | 95.1%                   | 1232.53 | 412.32       | 3 |
| in vitro | 256   | 265  | MAmLEENHAR              | M3 Oxidation               | 100%               | 35.79              | 100.0%                  | 1216.53 | 406.62       | 3 |
| in vitro | 256   | 265  | mAmLEENHAR              | M1 Oxidation, M3 Oxidation | 100%, 100%         | 1,000.00, 1,000.00 | 100.0%                  | 1232.53 | 412.36       | 3 |
| in vitro | 256   | 265  | mAmLEENHAR              | M1 Oxidation, M3 Oxidation | 100%, 100%         | 1,000.00, 1,000.00 | 97.1%                   | 1232.53 | 412.30       | 3 |
| in vitro | 256   | 265  | mAMLEENHAR              | M1 Oxidation, M3 Oxidation | 100%, 100%         | 1,000.00, 1,000.00 | 100.0%                  | 1232.53 | 617.62       | 2 |
| in vitro | 256   | 265  | mAMLEENHAR              | M1 Oxidation               | 99%                | 15.53              | 94.2%                   | 1216.53 | 609.94       | 2 |
| in vitro | 256   | 265  | MAMLEENHAR              | M3 Oxidation               | 100%               | 35.79              | 95.7%                   | 1216.53 | 406.99       | 3 |
| in vitro | 256   | 265  | MAMLEENHAR              |                            |                    |                    | 100.0%                  | 1200.54 | 401.47       | 3 |
| in vitro | 256   | 265  | mAmLEENHAR              | M1 Oxidation, M3 Oxidation | 100%, 100%         | 1,000.00, 1,000.00 | 100.0%                  | 1232.53 | 617.57       | 2 |
| in vitro | 256   | 265  | mAmLEENHAR              | M1 Oxidation, M3 Oxidation | 100%, 100%         | 1,000.00, 1,000.00 | 99.9%                   | 1232.53 | 412.22       | 3 |
| in vitro | 256   | 265  | mAMLEENHAR              | M1 Oxidation               | 57%                | 11.71              | 50.6%                   | 1216.53 | 406.78       | 3 |
| in vitro | 256   | 265  | mAMLEENHAR              | M1 Oxidation               | 78%                | 5.47               | 86.9%                   | 1216.53 | 609.89       | 2 |
| in vitro | 256   | 265  | MAMLEENHAR              |                            |                    |                    | 100.0%                  | 1200.54 | 401.52       | 3 |
| in vitro | 256   | 265  | MAMLEENHAR              |                            |                    |                    | 100.0%                  | 1200.54 | 401.20       | 3 |
| in vitro | 256   | 265  | MAMLEENHAR              | M3 Oxidation               | 100%               | 35.79              | 58.7%                   | 1216.53 | 407.05       | 3 |
| in vitro | 256   | 265  | MAMLEENHAR              |                            |                    |                    | 87.6%                   | 1200.54 | 401.49       | 3 |
| in vitro | 256   | 265  | mAmLEENHAR              | M1 Oxidation, M3 Oxidation | 100%, 100%         | 1,000.00, 1,000.00 | 100.0%                  | 1232.53 | 411.99       | 3 |
| in vitro | 256   | 265  | MAMLEENHAR              |                            |                    |                    | 52.0%                   | 1200.54 | 401.23       | 3 |
| in vitro | 256   | 265  | mAmLEENHAR              | M1 Oxidation, M3 Oxidation | 100%, 100%         | 1,000.00, 1,000.00 | 100.0%                  | 1232.53 | 412.16       | 3 |
| in vitro | 256   | 265  | mAMLEENHAR              | M1 Oxidation               | 99%                | 21.94              | 99.9%                   | 1216.53 | 1217.71      | 1 |
| in vitro | 266   | 288  | VmETAELQHQAELQDFASNIEQK | M2 Oxidation               | 100%               | 1,000.00           | 100.0%                  | 2674.25 | 893.14       | 3 |
| in vitro | 266   | 288  | VmETAELQHQAELQDFASNIEQK | M2 Oxidation               | 100%               | 1,000.00           | 100.0%                  | 2674.25 | 893.04       | 3 |
| in vitro | 266   | 288  | VmETAELQHQAELQDFASNIEQK | M2 Oxidation               | 100%               | 1,000.00           | 100.0%                  | 2674.25 | 893.12       | 3 |
| in vitro | 266   | 288  | VmETAELQHQAELQDFASNIEQK | M2 Oxidation               | 100%               | 1,000.00           | 100.0%                  | 2674.25 | 893.00       | 3 |
| in vitro | 266   | 288  | VmETAELQHQAELQDFASNIEQK | M2 Oxidation               | 100%               | 1,000.00           | 100.0%                  | 2674.25 | 893.24       | 3 |
| in vitro | 266   | 288  | VmETAELQHQAELQDFASNIEQK | M2 Oxidation               | 100%               | 1,000.00           | 100.0%                  | 2674.25 | 892.94       | 3 |
| in vitro | 266   | 288  | VmETAELQHQAELQDFASNIEQK | M2 Oxidation               | 100%               | 1,000.00           | 100.0%                  | 2674.25 | 893.06       | 3 |
| in vitro | 266   | 288  | VMETAELQHQAELQDFASNIEQK |                            |                    |                    | 100.0%                  | 2658.26 | 1330.96      | 2 |
| in vitro | 266   | 288  | VmETAELQHQAELQDFASNIEQK | M2 Oxidation               | 100%               | 1,000.00           | 100.0%                  | 2674.25 | 893.10       | 3 |
| in vitro | 266   | 288  | VmETAELQHQAELQDFASNIEQK | M2 Oxidation               | 100%               | 1,000.00           | 100.0%                  | 2674.25 | 892.87       | 3 |
| in vitro | 266   | 288  | VmETAELQHQAELQDFASNIEQK | M2 Oxidation               | 100%               | 1,000.00           | 100.0%                  | 2674.25 | 893.14       | 3 |
| in vitro | 266   | 288  | VmETAELQHQAELQDFASNIEQK | M2 Oxidation               | 100%               | 1,000.00           | 100.0%                  | 2674.25 | 892.99       | 3 |
| in vitro | 266   | 288  | VmETAELQHQAELQDFASNIEQK | M2 Oxidation               | 100%               | 1,000.00           | 100.0%                  | 2674.25 | 893.04       | 3 |
| in vitro | 266   | 288  | VmETAELQHQAELQDFASNIEQK | M2 Oxidation               | 100%               | 1,000.00           | 100.0%                  | 2674.25 | 893.11       | 3 |
| in vitro | 266   | 288  | VmETAELQHQAELQDFASNIEQK | M2 Oxidation               | 100%               | 1,000.00           | 100.0%                  | 2674.25 | 892.80       | 3 |

| Where       | Start | Stop | Peptide Sequence         | Variable Modifications | Localization Prob. | Ascore   | Scaffold: Peptide Prob. | Mass    | Observed m/z | Z |
|-------------|-------|------|--------------------------|------------------------|--------------------|----------|-------------------------|---------|--------------|---|
| in vitro    | 266   | 288  | VmETAELQHQAEQLQDFASNIEQK | M2 Oxidation           | 100%               | 1,000.00 | 100.0%                  | 2674.25 | 893.17       | 3 |
| in vitro    | 266   | 288  | VmETAELQHQAEQLQDFASNIEQK | M2 Oxidation           | 100%               | 1,000.00 | 100.0%                  | 2674.25 | 892.85       | 3 |
| in vitro    | 266   | 288  | VMETAELQHQAEQLQDFASNIEQK |                        |                    |          | 100.0%                  | 2658.26 | 1330.59      | 2 |
| in vitro    | 266   | 288  | VMETAELQHQAEQLQDFASNIEQK |                        |                    |          | 100.0%                  | 2658.26 | 887.48       | 3 |
| in vitro    | 266   | 288  | VmETAELQHQAEQLQDFASNIEQK | M2 Oxidation           | 100%               | 1,000.00 | 100.0%                  | 2674.25 | 892.99       | 3 |
| in vitro    | 266   | 288  | VMETAELQHQAEQLQDFASNIEQK |                        |                    |          | 100.0%                  | 2658.26 | 887.79       | 3 |
| in vitro    | 266   | 288  | VMETAELQHQAEQLQDFASNIEQK |                        |                    |          | 100.0%                  | 2658.26 | 887.52       | 3 |
| in vitro    | 266   | 288  | VMETAELQHQAEQLQDFASNIEQK |                        |                    |          | 100.0%                  | 2658.26 | 887.73       | 3 |
| in vitro    | 266   | 288  | VmETAELQHQAEQLQDFASNIEQK | M2 Oxidation           | 100%               | 1,000.00 | 100.0%                  | 2674.25 | 892.78       | 3 |
| in vitro    | 266   | 288  | VMETAELQHQAEQLQDFASNIEQK |                        |                    |          | 100.0%                  | 2658.26 | 887.77       | 3 |
| in vitro    | 266   | 288  | VMETAELQHQAEQLQDFASNIEQK |                        |                    |          | 100.0%                  | 2658.26 | 887.54       | 3 |
| in vitro    | 266   | 288  | VmETAELQHQAEQLQDFASNIEQK | M2 Oxidation           | 100%               | 1,000.00 | 100.0%                  | 2674.25 | 892.92       | 3 |
| in vitro    | 266   | 288  | VMETAELQHQAEQLQDFASNIEQK |                        |                    |          | 100.0%                  | 2658.26 | 887.61       | 3 |
| in vitro    | 266   | 288  | VMETAELQHQAEQLQDFASNIEQK |                        |                    |          | 100.0%                  | 2658.26 | 887.57       | 3 |
| in vitro    | 266   | 288  | VMETAELQHQAEQLQDFASNIEQK |                        |                    |          | 100.0%                  | 2658.26 | 887.59       | 3 |
| in vitro    | 266   | 288  | VmETAELQHQAEQLQDFASNIEQK | M2 Oxidation           | 100%               | 1,000.00 | 100.0%                  | 2674.25 | 892.69       | 3 |
| in vitro    | 266   | 288  | VMETAELQHQAEQLQDFASNIEQK |                        |                    |          | 100.0%                  | 2658.26 | 887.76       | 3 |
| in vitro    | 266   | 288  | VMETAELQHQAEQLQDFASNIEQK |                        |                    |          | 100.0%                  | 2658.26 | 887.42       | 3 |
| in vitro    | 266   | 288  | VMETAELQHQAEQLQDFASNIEQK |                        |                    |          | 100.0%                  | 2658.26 | 887.55       | 3 |
| in vitro    | 266   | 288  | VMETAELQHQAEQLQDFASNIEQK |                        |                    |          | 100.0%                  | 2658.26 | 887.63       | 3 |
| in vitro    | 266   | 288  | VMETAELQHQAEQLQDFASNIEQK |                        |                    |          | 100.0%                  | 2658.26 | 887.25       | 3 |
| in vitro    | 266   | 288  | VMETAELQHQAEQLQDFASNIEQK |                        |                    |          | 100.0%                  | 2658.26 | 887.68       | 3 |
| in vitro    | 266   | 288  | VMETAELQHQAEQLQDFASNIEQK |                        |                    |          | 100.0%                  | 2658.26 | 887.72       | 3 |
| in vitro    | 266   | 288  | VMETAELQHQAEQLQDFASNIEQK |                        |                    |          | 100.0%                  | 2658.26 | 887.41       | 3 |
| in vitro    | 266   | 288  | VmETAELQHQAEQLQDFASNIEQK | M2 Oxidation           | 100%               | 1,000.00 | 100.0%                  | 2674.25 | 892.81       | 3 |
| in vivo-OFF | 289   | 310  | ANSLImEYKNELQSAEEHFHSHK  | M6 Oxidation           | 100%               | 1,000.00 | 100.0%                  | 2620.22 | 874.84       | 3 |
| in vivo-OFF | 289   | 310  | ANSLImEYKNELQSAEEHFHSHK  | M6 Oxidation           | 100%               | 1,000.00 | 100.0%                  | 2620.22 | 874.98       | 3 |
| in vivo-OFF | 289   | 310  | ANSLIMEYKNELQSAEEHFHSHK  |                        |                    |          | 100.0%                  | 2604.23 | 869.81       | 3 |
| in vivo-OFF | 289   | 310  | ANSLIMEYKNELQSAEEHFHSHK  |                        |                    |          | 100.0%                  | 2604.23 | 869.31       | 3 |
| in vivo-OFF | 297   | 307  | KNELQSAEEHF              |                        |                    |          | 100.0%                  | 1330.62 | 444.87       | 3 |
| in vivo-OFF | 297   | 307  | KNELQSAEEHF              |                        |                    |          | 98.1%                   | 1330.62 | 444.84       | 3 |
| in vivo-OFF | 298   | 307  | NELQSAEEHF               |                        |                    |          | 94.0%                   | 1202.52 | 602.13       | 2 |
| in vivo-OFF | 298   | 307  | NELQSAEEHF               |                        |                    |          | 99.4%                   | 1202.52 | 602.06       | 2 |
| in vivo-OFF | 298   | 307  | NELQSAEEHF               |                        |                    |          | 96.0%                   | 1202.52 | 602.04       | 2 |
| in vivo-OFF | 298   | 310  | NELQSAEEHFHSHK           |                        |                    |          | 100.0%                  | 1554.71 | 778.21       | 2 |
| in vivo-OFF | 298   | 307  | NELQSAEEHF               |                        |                    |          | 92.7%                   | 1202.52 | 601.93       | 2 |
| in vivo-OFF | 298   | 310  | NELQSAEEHFHSHK           |                        |                    |          | 100.0%                  | 1554.71 | 778.30       | 2 |
| in vivo-OFF | 298   | 310  | NELQSAEEHFHSHK           |                        |                    |          | 100.0%                  | 1554.71 | 779.08       | 2 |
| in vivo-OFF | 298   | 310  | NELQSAEEHFHSHK           |                        |                    |          | 100.0%                  | 1554.71 | 778.73       | 2 |
| in vivo-OFF | 298   | 310  | NELQSAEEHFHSHK           |                        |                    |          | 100.0%                  | 1554.71 | 778.79       | 2 |
| in vivo-OFF | 298   | 310  | NELQSAEEHFHSHK           |                        |                    |          | 100.0%                  | 1554.71 | 778.75       | 2 |
| in vivo-OFF | 298   | 310  | NELQSAEEHFHSHK           |                        |                    |          | 100.0%                  | 1554.71 | 778.73       | 2 |
| in vivo-OFF | 311   | 321  | IKELTSENELK              |                        |                    |          | 100.0%                  | 1302.70 | 652.63       | 2 |
| in vivo-OFF | 311   | 321  | IKELTSENELK              |                        |                    |          | 100.0%                  | 1302.70 | 652.30       | 2 |
| in vivo-OFF | 311   | 321  | IKELTSENELK              |                        |                    |          | 99.6%                   | 1302.70 | 435.63       | 3 |
| in vivo-OFF | 311   | 321  | IKELTSENELK              |                        |                    |          | 100.0%                  | 1302.70 | 435.57       | 3 |
| in vivo-OFF | 311   | 321  | IKELTSENELK              |                        |                    |          | 99.7%                   | 1302.70 | 435.43       | 3 |
| in vivo-OFF | 311   | 321  | IKELTSENELK              |                        |                    |          | 100.0%                  | 1302.70 | 652.67       | 2 |
| in vivo-OFF | 311   | 321  | IKELTSENELK              |                        |                    |          | 100.0%                  | 1302.70 | 652.76       | 2 |
| in vivo-OFF | 311   | 321  | IKELTSENELK              |                        |                    |          | 100.0%                  | 1302.70 | 435.74       | 3 |
| in vivo-OFF | 311   | 321  | IKELTSENELK              |                        |                    |          | 100.0%                  | 1302.70 | 435.58       | 3 |
| in vivo-OFF | 311   | 321  | IKELTSENELK              |                        |                    |          | 99.7%                   | 1302.70 | 435.51       | 3 |
| in vivo-OFF | 311   | 321  | IKELTSENELK              |                        |                    |          | 100.0%                  | 1302.70 | 1303.77      | 1 |
| in vivo-OFF | 325   | 334  | LQEEKDSSLK               |                        |                    |          | 99.9%                   | 1201.66 | 402.02       | 3 |
| in vivo-OFF | 325   | 335  | LQEEKDSSLKK              |                        |                    |          | 100.0%                  | 1329.75 | 666.27       | 2 |
| in vivo-OFF | 325   | 335  | LQEEKDSSLKK              |                        |                    |          | 98.9%                   | 1329.75 | 666.13       | 2 |
| in vivo-OFF | 335   | 346  | KVQEGASLAMQR             |                        |                    |          | 100.0%                  | 1316.69 | 440.11       | 3 |
| in vivo-OFF | 335   | 346  | KVQEGASLAMQR             | M10 Oxidation          | 100%               | 1,000.00 | 100.0%                  | 1332.68 | 667.77       | 2 |

| Where       | Start | Stop | Peptide Sequence         | Variable Modifications | Localization Prob. | Ascore   | Scaffold: Peptide Prob. | Mass    | Observed m/z | Z |
|-------------|-------|------|--------------------------|------------------------|--------------------|----------|-------------------------|---------|--------------|---|
| in vivo-OFF | 335   | 346  | KVQEGASLAmQR             | M10 Oxidation          | 100%               | 1,000.00 | 100.0%                  | 1332.68 | 445.75       | 3 |
| in vivo-OFF | 336   | 346  | VQEGASLAmQR              | M9 Oxidation           | 100%               | 1,000.00 | 100.0%                  | 1204.59 | 603.59       | 2 |
| in vivo-OFF | 336   | 346  | VQEGASLAmQR              | M9 Oxidation           | 100%               | 1,000.00 | 100.0%                  | 1204.59 | 603.66       | 2 |
| in vivo-OFF | 336   | 346  | VQEGASLAmQR              | M9 Oxidation           | 100%               | 1,000.00 | 97.0%                   | 1204.59 | 403.00       | 3 |
| in vivo-OFF | 336   | 346  | VQEGASLAmQR              |                        |                    |          | 100.0%                  | 1188.59 | 595.40       | 2 |
| in vivo-OFF | 336   | 346  | VQEGASLAmQR              |                        |                    |          | 100.0%                  | 1188.59 | 595.37       | 2 |
| in vivo-OFF | 336   | 346  | VQEGASLAmQR              | M9 Oxidation           | 100%               | 1,000.00 | 100.0%                  | 1204.59 | 603.67       | 2 |
| in vivo-OFF | 336   | 346  | VQEGASLAmQR              | M9 Oxidation           | 100%               | 1,000.00 | 100.0%                  | 1204.59 | 603.56       | 2 |
| in vivo-OFF | 336   | 346  | VQEGASLAmQR              | M9 Oxidation           | 100%               | 1,000.00 | 100.0%                  | 1204.59 | 603.63       | 2 |
| in vivo-OFF | 336   | 346  | VQEGASLAmQR              |                        |                    |          | 100.0%                  | 1188.59 | 595.59       | 2 |
| in vivo-OFF | 336   | 346  | VQEGASLAmQR              |                        |                    |          | 100.0%                  | 1188.59 | 596.26       | 2 |
| in vivo-OFF | 336   | 346  | VQEGASLAmQR              |                        |                    |          | 100.0%                  | 1188.59 | 595.24       | 2 |
| in vivo-OFF | 336   | 346  | VQEGASLAmQR              |                        |                    |          | 80.3%                   | 1188.59 | 595.29       | 2 |
| in vivo-OFF | 336   | 346  | VQEGASLAmQR              |                        |                    |          | 99.9%                   | 1188.59 | 1189.93      | 1 |
| in vivo-OFF | 336   | 346  | VQEGASLAmQR              |                        |                    |          | 100.0%                  | 1188.59 | 1189.65      | 1 |
| in vivo-OFF | 347   | 355  | VQNKHDLEK                |                        |                    |          | 100.0%                  | 1109.58 | 556.12       | 2 |
| in vivo-OFF | 347   | 355  | VQNKHDLEK                |                        |                    |          | 97.4%                   | 1109.58 | 556.72       | 2 |
| in vivo-OFF | 347   | 355  | VQNKHDLEK                |                        |                    |          | 99.9%                   | 1109.58 | 556.71       | 2 |
| in vivo-OFF | 347   | 355  | VQNKHDLEK                |                        |                    |          | 100.0%                  | 1109.58 | 556.15       | 2 |
| in vivo-OFF | 351   | 373  | HDLEKKRLQSAIQPLQEENNSLK  |                        |                    |          | 100.0%                  | 2717.45 | 906.53       | 3 |
| in vivo-OFF | 351   | 373  | HDLEKKRLQSAIQPLQEENNSLK  |                        |                    |          | 100.0%                  | 2717.45 | 906.92       | 3 |
| in vivo-OFF | 351   | 373  | HDLEKKRLQSAIQPLQEENNSLK  |                        |                    |          | 100.0%                  | 2717.45 | 906.64       | 3 |
| in vivo-OFF | 351   | 373  | HDLEKKRLQSAIQPLQEENNSLK  |                        |                    |          | 100.0%                  | 2717.45 | 906.76       | 3 |
| in vivo-OFF | 351   | 373  | HDLEKKRLQSAIQPLQEENNSLK  |                        |                    |          | 100.0%                  | 2717.45 | 906.77       | 3 |
| in vivo-OFF | 357   | 373  | RLQSAIQPLQEENNSLK        |                        |                    |          | 100.0%                  | 1967.04 | 985.16       | 2 |
| in vivo-OFF | 357   | 373  | RLQSAIQPLQEENNSLK        |                        |                    |          | 100.0%                  | 1967.04 | 984.76       | 2 |
| in vivo-OFF | 357   | 373  | RLQSAIQPLQEENNSLK        |                        |                    |          | 100.0%                  | 1967.04 | 984.79       | 2 |
| in vivo-OFF | 358   | 373  | LQSAIQPLQEENNSLK         |                        |                    |          | 100.0%                  | 1810.94 | 605.29       | 3 |
| in vivo-OFF | 358   | 373  | LQSAIQPLQEENNSLK         |                        |                    |          | 100.0%                  | 1810.94 | 605.13       | 3 |
| in vivo-OFF | 358   | 373  | LQSAIQPLQEENNSLK         |                        |                    |          | 100.0%                  | 1810.94 | 906.78       | 2 |
| in vivo-OFF | 358   | 373  | LQSAIQPLQEENNSLK         |                        |                    |          | 100.0%                  | 1810.94 | 906.72       | 2 |
| in vivo-OFF | 358   | 373  | LQSAIQPLQEENNSLK         |                        |                    |          | 100.0%                  | 1810.94 | 907.20       | 2 |
| in vivo-OFF | 358   | 373  | LQSAIQPLQEENNSLK         |                        |                    |          | 99.2%                   | 1810.94 | 906.84       | 2 |
| in vivo-OFF | 358   | 373  | LQSAIQPLQEENNSLK         |                        |                    |          | 100.0%                  | 1810.94 | 906.69       | 2 |
| in vivo-OFF | 358   | 373  | LQSAIQPLQEENNSLK         |                        |                    |          | 98.1%                   | 1810.94 | 907.25       | 2 |
| in vivo-OFF | 358   | 373  | LQSAIQPLQEENNSLK         |                        |                    |          | 97.3%                   | 1810.94 | 907.21       | 2 |
| in vivo-OFF | 358   | 373  | LQSAIQPLQEENNSLK         |                        |                    |          | 100.0%                  | 1810.94 | 906.27       | 2 |
| in vivo-OFF | 358   | 373  | LQSAIQPLQEENNSLK         |                        |                    |          | 100.0%                  | 1810.94 | 906.66       | 2 |
| in vivo-OFF | 358   | 373  | LQSAIQPLQEENNSLK         |                        |                    |          | 100.0%                  | 1810.94 | 906.92       | 2 |
| in vivo-OFF | 358   | 373  | LQSAIQPLQEENNSLK         |                        |                    |          | 100.0%                  | 1810.94 | 906.80       | 2 |
| in vivo-OFF | 358   | 373  | LQSAIQPLQEENNSLK         |                        |                    |          | 100.0%                  | 1810.94 | 907.43       | 2 |
| in vivo-OFF | 358   | 373  | LQSAIQPLQEENNSLK         |                        |                    |          | 100.0%                  | 1810.94 | 907.22       | 2 |
| in vivo-OFF | 358   | 381  | LQSAIQPLQEENNSLKQQIEQLQR |                        |                    |          | 100.0%                  | 2834.49 | 946.53       | 3 |
| in vivo-OFF | 358   | 373  | LQSAIQPLQEENNSLK         |                        |                    |          | 100.0%                  | 1810.94 | 906.74       | 2 |
| in vivo-OFF | 358   | 373  | LQSAIQPLQEENNSLK         |                        |                    |          | 100.0%                  | 1810.94 | 1812.30      | 1 |
| in vivo-OFF | 374   | 381  | QQIEQLQR                 |                        |                    |          | 64.2%                   | 1041.56 | 1042.73      | 1 |
| in vivo-OFF | 374   | 381  | QQIEQLQR                 |                        |                    |          | 64.7%                   | 1041.56 | 1042.68      | 1 |
| in vivo-OFF | 382   | 390  | ELASETVVK                |                        |                    |          | 100.0%                  | 974.53  | 488.49       | 2 |
| in vivo-OFF | 382   | 390  | ELASETVVK                |                        |                    |          | 99.4%                   | 974.53  | 488.51       | 2 |
| in vivo-OFF | 382   | 390  | ELASETVVK                |                        |                    |          | 61.6%                   | 974.53  | 488.57       | 2 |
| in vivo-OFF | 382   | 390  | ELASETVVK                |                        |                    |          | 89.3%                   | 974.53  | 488.50       | 2 |
| in vivo-OFF | 382   | 390  | ELASETVVK                |                        |                    |          | 99.7%                   | 974.53  | 488.53       | 2 |
| in vivo-OFF | 382   | 390  | ELASETVVK                |                        |                    |          | 98.4%                   | 974.53  | 488.53       | 2 |
| in vivo-OFF | 382   | 394  | ELASETVVKENLK            |                        |                    |          | 97.1%                   | 1458.79 | 487.66       | 3 |
| in vivo-OFF | 382   | 394  | ELASETVVKENLK            |                        |                    |          | 87.8%                   | 1458.79 | 487.62       | 3 |
| in vivo-OFF | 395   | 406  | SSLDQQSANVQK             |                        |                    |          | 100.0%                  | 1303.64 | 653.10       | 2 |
| in vivo-OFF | 395   | 406  | SSLDQQSANVQK             |                        |                    |          | 100.0%                  | 1303.64 | 653.13       | 2 |
| in vivo-OFF | 395   | 406  | SSLDQQSANVQK             |                        |                    |          | 100.0%                  | 1303.64 | 653.10       | 2 |

| Where       | Start | Stop | Peptide Sequence           | Variable Modifications                     | Localization Prob. | Ascore             | Scaffold: Peptide Prob. | Mass    | Observed m/z | z |
|-------------|-------|------|----------------------------|--------------------------------------------|--------------------|--------------------|-------------------------|---------|--------------|---|
| in vivo-OFF | 395   | 406  | SSLDQQSANVQK               |                                            |                    |                    | 70.4%                   | 1303.64 | 653.65       | 2 |
| in vivo-OFF | 395   | 406  | SSLDQQSANVQK               |                                            |                    |                    | 100.0%                  | 1303.64 | 653.13       | 2 |
| in vivo-OFF | 420   | 429  | TLEEDVYmK                  | M9 Oxidation                               | 100%               | 1,000.00           | 100.0%                  | 1243.56 | 623.54       | 2 |
| in vivo-OFF | 420   | 429  | TLEEDVYmK                  | M9 Oxidation                               | 100%               | 1,000.00           | 100.0%                  | 1243.56 | 622.93       | 2 |
| in vivo-OFF | 420   | 429  | TLEEDVYTMK                 |                                            |                    |                    | 100.0%                  | 1227.57 | 615.28       | 2 |
| in vivo-OFF | 432   | 440  | IIELEGILK                  |                                            |                    |                    | 100.0%                  | 1026.63 | 1027.53      | 1 |
| in vivo-OFF | 432   | 440  | IIELEGILK                  |                                            |                    |                    | 100.0%                  | 1026.63 | 514.54       | 2 |
| in vivo-OFF | 432   | 440  | IIELEGILK                  |                                            |                    |                    | 85.5%                   | 1026.63 | 514.58       | 2 |
| in vivo-OFF | 432   | 440  | IIELEGILK                  |                                            |                    |                    | 100.0%                  | 1026.63 | 514.64       | 2 |
| in vivo-OFF | 447   | 452  | DGLVEK                     |                                            |                    |                    | 99.7%                   | 659.35  | 660.34       | 1 |
| in vivo-OFF | 453   | 460  | LIAEETLR                   |                                            |                    |                    | 100.0%                  | 943.53  | 472.72       | 2 |
| in vivo-OFF | 453   | 460  | LIAEETLR                   |                                            |                    |                    | 100.0%                  | 943.53  | 473.08       | 2 |
| in vivo-OFF | 453   | 460  | LIAEETLR                   |                                            |                    |                    | 99.9%                   | 943.53  | 472.79       | 2 |
| in vivo-OFF | 453   | 460  | LIAEETLR                   |                                            |                    |                    | 100.0%                  | 943.53  | 473.04       | 2 |
| in vivo-OFF | 453   | 460  | LIAEETLR                   |                                            |                    |                    | 85.2%                   | 943.53  | 946.62       | 1 |
| in vivo-OFF | 453   | 460  | LIAEETLR                   |                                            |                    |                    | 100.0%                  | 943.53  | 944.62       | 1 |
| in vivo-OFF | 462   | 471  | KLHNTIQELK                 |                                            |                    |                    | 100.0%                  | 1222.70 | 408.94       | 3 |
| in vivo-OFF | 462   | 471  | KLHNTIQELK                 |                                            |                    |                    | 100.0%                  | 1222.70 | 408.88       | 3 |
| in vivo-OFF | 462   | 471  | KLHNTIQELK                 |                                            |                    |                    | 100.0%                  | 1222.70 | 408.94       | 3 |
| in vivo-OFF | 462   | 471  | KLHNTIQELK                 |                                            |                    |                    | 99.0%                   | 1222.70 | 612.14       | 2 |
| in vivo-OFF | 462   | 471  | KLHNTIQELK                 |                                            |                    |                    | 100.0%                  | 1222.70 | 612.77       | 2 |
| in vivo-OFF | 462   | 471  | KLHNTIQELK                 |                                            |                    |                    | 100.0%                  | 1222.70 | 612.88       | 2 |
| in vivo-OFF | 462   | 471  | KLHNTIQELK                 |                                            |                    |                    | 100.0%                  | 1222.70 | 612.52       | 2 |
| in vivo-OFF | 462   | 471  | KLHNTIQELK                 |                                            |                    |                    | 100.0%                  | 1222.70 | 612.83       | 2 |
| in vivo-OFF | 462   | 471  | KLHNTIQELK                 |                                            |                    |                    | 100.0%                  | 1222.70 | 612.49       | 2 |
| in vivo-OFF | 462   | 471  | KLHNTIQELK                 |                                            |                    |                    | 100.0%                  | 1222.70 | 612.60       | 2 |
| in vivo-OFF | 462   | 471  | KLHNTIQELK                 |                                            |                    |                    | 100.0%                  | 1222.70 | 409.09       | 3 |
| in vivo-OFF | 462   | 471  | KLHNTIQELK                 |                                            |                    |                    | 100.0%                  | 1222.70 | 408.96       | 3 |
| in vivo-OFF | 522   | 529  | QYAFNFDR                   |                                            |                    |                    | 100.0%                  | 1059.48 | 1060.43      | 1 |
| in vivo-OFF | 570   | 585  | THTMSSNTGmIPSSVR           |                                            |                    |                    | 100.0%                  | 1704.79 | 853.83       | 2 |
| in vivo-OFF | 570   | 585  | THTMSSNTGmIPSSVR           | M10 Oxidation                              | 100%               | 94.27              | 100.0%                  | 1720.79 | 861.81       | 2 |
| in vivo-OFF | 570   | 585  | THTMSSNTGmIPSSVR           |                                            |                    |                    | 100.0%                  | 1704.79 | 853.79       | 2 |
| in vivo-OFF | 570   | 585  | THTMSSNTGmIPSSVR           | M10 Oxidation                              | 100%               | 104.48             | 100.0%                  | 1720.79 | 861.53       | 2 |
| in vivo-OFF | 570   | 585  | THTmSSNTGmIPSSVR           | M4 Oxidation, M10 Oxidation                | 100%, 100%         | 1,000.00, 1,000.00 | 100.0%                  | 1736.78 | 869.79       | 2 |
| in vivo-OFF | 570   | 585  | THTMSSNTGmIPSSVR           |                                            |                    |                    | 100.0%                  | 1704.79 | 854.35       | 2 |
| in vivo-OFF | 570   | 585  | THTMSSNTGmIPSSVR           |                                            |                    |                    | 100.0%                  | 1704.79 | 853.81       | 2 |
| in vivo-OFF | 570   | 585  | THTmSSNTGmIPSSVR           | M4 Oxidation, M10 Oxidation                | 100%, 100%         | 1,000.00, 1,000.00 | 100.0%                  | 1736.78 | 870.28       | 2 |
| in vivo-OFF | 570   | 585  | THTMSSNTGmIPSSVR           | M10 Oxidation                              | 100%               | 58.16              | 100.0%                  | 1720.79 | 861.84       | 2 |
| in vivo-OFF | 570   | 585  | THTmSSNTGmIPSSVR           | M4 Oxidation                               | 100%               | 102.92             | 100.0%                  | 1720.79 | 862.31       | 2 |
| in vivo-OFF | 603   | 627  | mEGQFLEIYNETIIDLLASGNEEEEK | M1 Oxidation                               | 100%               | 1,000.00           | 100.0%                  | 2900.36 | 968.47       | 3 |
| in vivo-OFF | 603   | 627  | mEGQFLEIYNETIIDLLASGNEEEEK | M1 Oxidation                               | 100%               | 1,000.00           | 100.0%                  | 3085.48 | 1030.01      | 3 |
| in vivo-OFF | 603   | 627  | mEGQFLEIYNETIIDLLASGNEEEEK | M1 Oxidation                               | 100%               | 1,000.00           | 100.0%                  | 2900.36 | 1451.85      | 2 |
| in vivo-OFF | 671   | 683  | SVAATNANEHSSR              |                                            |                    |                    | 100.0%                  | 1342.62 | 672.67       | 2 |
| in vivo-OFF | 671   | 683  | SVAATNANEHSSR              |                                            |                    |                    | 100.0%                  | 1342.62 | 672.76       | 2 |
| in vivo-OFF | 684   | 704  | SHSVFmLHLNGSNSTTGETcR      | C20 Iodoacetamide derivative               | 100%               | 1,000.00           | 100.0%                  | 2334.05 | 779.63       | 3 |
| in vivo-OFF | 684   | 704  | SHSVFmLHLNGSNSTTGETcR      | C20 Iodoacetamide derivative               | 100%               | 1,000.00           | 100.0%                  | 2334.05 | 779.66       | 3 |
| in vivo-OFF | 684   | 704  | SHSVFmLHLNGSNSTTGETcR      | M6 Oxidation, C20 Iodoacetamide derivative | 100%, 100%         | 1,000.00, 1,000.00 | 100.0%                  | 2350.04 | 784.84       | 3 |
| in vivo-OFF | 705   | 717  | STLNLIDLAGSER              |                                            |                    |                    | 100.0%                  | 1387.73 | 695.25       | 2 |
| in vivo-OFF | 705   | 717  | STLNLIDLAGSER              |                                            |                    |                    | 100.0%                  | 1387.73 | 695.32       | 2 |
| in vivo-OFF | 705   | 717  | STLNLIDLAGSER              |                                            |                    |                    | 99.9%                   | 1387.73 | 695.34       | 2 |
| in vivo-OFF | 705   | 717  | STLNLIDLAGSER              |                                            |                    |                    | 100.0%                  | 1387.73 | 1388.81      | 1 |
| in vivo-OFF | 708   | 718  | NLIDLAGSERL                |                                            |                    |                    | 100.0%                  | 1199.65 | 601.13       | 2 |
| in vivo-OFF | 708   | 718  | NLIDLAGSERL                |                                            |                    |                    | 100.0%                  | 1199.65 | 600.81       | 2 |
| in vivo-OFF | 708   | 718  | NLIDLAGSERL                |                                            |                    |                    | 78.3%                   | 1199.65 | 600.77       | 2 |
| in vivo-OFF | 718   | 727  | LSSSQSVGER                 |                                            |                    |                    | 100.0%                  | 1048.51 | 525.53       | 2 |
| in vivo-OFF | 718   | 727  | LSSSQSVGER                 |                                            |                    |                    | 100.0%                  | 1048.51 | 525.53       | 2 |
| in vivo-OFF | 718   | 727  | LSSSQSVGER                 |                                            |                    |                    | 100.0%                  | 1048.51 | 525.30       | 2 |
| in vivo-OFF | 718   | 727  | LSSSQSVGER                 |                                            |                    |                    | 100.0%                  | 1048.51 | 525.50       | 2 |



| Where       | Start | Stop | Peptide Sequence        | Variable Modifications      | Localization Prob. | Ascore   | Scaffold: Peptide Prob. | Mass    | Observed m/z | z |
|-------------|-------|------|-------------------------|-----------------------------|--------------------|----------|-------------------------|---------|--------------|---|
| in vivo-OFF | 718   | 727  | LSSSQSVGER              |                             |                    |          | 100.0%                  | 1048.51 | 525.72       | 2 |
| in vivo-OFF | 730   | 752  | ETQAINKsLSCLGDVIHALGSGK | S8 Phosphorylation          | 7%                 | 0        | 83.5%                   | 2420.18 | 807.84       | 3 |
| in vivo-OFF | 730   | 752  | ETQAINKsLSCLGDVIHALGSGK | S8 Phosphorylation          | 86%                | 8.26     | 83.2%                   | 2420.18 | 807.85       | 3 |
| in vivo-OFF | 737   | 752  | SLScLGDVIHALGSGK        | C4 Iodoacetamide derivative | 100%               | 1,000.00 | 100.0%                  | 1612.82 | 807.94       | 2 |
| in vivo-OFF | 737   | 752  | SLScLGDVIHALGSGK        | C4 Iodoacetamide derivative | 100%               | 1,000.00 | 100.0%                  | 1612.82 | 807.79       | 2 |
| in vivo-OFF | 737   | 752  | SLScLGDVIHALGSGK        | C4 Iodoacetamide derivative | 100%               | 1,000.00 | 100.0%                  | 1612.82 | 808.44       | 2 |
| in vivo-OFF | 737   | 752  | SLScLGDVIHALGSGK        | C4 Iodoacetamide derivative | 100%               | 1,000.00 | 100.0%                  | 1612.82 | 807.85       | 2 |
| in vivo-OFF | 737   | 752  | SLScLGDVIHALGSGK        | C4 Iodoacetamide derivative | 100%               | 1,000.00 | 100.0%                  | 1612.82 | 808.35       | 2 |
| in vivo-OFF | 737   | 752  | SLScLGDVIHALGSGK        | C4 Iodoacetamide derivative | 100%               | 1,000.00 | 100.0%                  | 1612.82 | 807.84       | 2 |
| in vivo-OFF | 737   | 752  | SLScLGDVIHALGSGK        | C4 Iodoacetamide derivative | 100%               | 1,000.00 | 100.0%                  | 1612.82 | 807.49       | 2 |
| in vivo-OFF | 737   | 752  | SLScLGDVIHALGSGK        | C4 Iodoacetamide derivative | 100%               | 1,000.00 | 100.0%                  | 1612.82 | 807.62       | 2 |
| in vivo-OFF | 737   | 752  | SLScLGDVIHALGSGK        | C4 Iodoacetamide derivative | 100%               | 1,000.00 | 100.0%                  | 1612.82 | 807.96       | 2 |
| in vivo-OFF | 737   | 752  | SLScLGDVIHALGSGK        | C4 Iodoacetamide derivative | 100%               | 1,000.00 | 100.0%                  | 1612.82 | 808.24       | 2 |
| in vivo-OFF | 737   | 752  | SLScLGDVIHALGSGK        | C4 Iodoacetamide derivative | 100%               | 1,000.00 | 100.0%                  | 1612.82 | 808.35       | 2 |
| in vivo-OFF | 737   | 752  | SLScLGDVIHALGSGK        | C4 Iodoacetamide derivative | 100%               | 1,000.00 | 100.0%                  | 1612.82 | 808.24       | 2 |
| in vivo-OFF | 737   | 752  | SLScLGDVIHALGSGK        | C4 Iodoacetamide derivative | 100%               | 1,000.00 | 100.0%                  | 1612.82 | 539.08       | 3 |
| in vivo-OFF | 737   | 752  | SLScLGDVIHALGSGK        | C4 Iodoacetamide derivative | 100%               | 1,000.00 | 100.0%                  | 1612.82 | 538.97       | 3 |
| in vivo-OFF | 737   | 752  | SLScLGDVIHALGSGK        | C4 Iodoacetamide derivative | 100%               | 1,000.00 | 100.0%                  | 1612.82 | 539.26       | 3 |
| in vivo-OFF | 771   | 779  | SLGGNSKTL               |                             |                    |          | 99.7%                   | 875.47  | 438.99       | 2 |
| in vivo-OFF | 778   | 788  | TLmFVNISPLK             | M3 Oxidation                | 100%               | 1,000.00 | 100.0%                  | 1277.71 | 640.15       | 2 |
| in vivo-OFF | 778   | 788  | TLmFVNISPLK             | M3 Oxidation                | 100%               | 1,000.00 | 100.0%                  | 1277.71 | 640.11       | 2 |
| in vivo-OFF | 778   | 788  | TLmFVNISPLK             | M3 Oxidation                | 100%               | 1,000.00 | 100.0%                  | 1277.71 | 640.14       | 2 |
| in vivo-OFF | 778   | 788  | TLmFVNISPLK             | M3 Oxidation                | 100%               | 1,000.00 | 100.0%                  | 1277.71 | 639.88       | 2 |
| in vivo-OFF | 778   | 788  | TLmFVNISPLK             | M3 Oxidation                | 100%               | 1,000.00 | 100.0%                  | 1277.71 | 639.82       | 2 |
| in vivo-OFF | 778   | 788  | TLmFVNISPLK             | M3 Oxidation                | 100%               | 1,000.00 | 100.0%                  | 1277.71 | 640.14       | 2 |
| in vivo-OFF | 778   | 788  | TLmFVNISPLK             | M3 Oxidation                | 100%               | 1,000.00 | 100.0%                  | 1277.71 | 640.28       | 2 |
| in vivo-OFF | 778   | 788  | TLmFVNISPLK             | M3 Oxidation                | 100%               | 1,000.00 | 100.0%                  | 1277.71 | 640.23       | 2 |
| in vivo-OFF | 778   | 788  | TLmFVNISPLK             | M3 Oxidation                | 100%               | 1,000.00 | 100.0%                  | 1277.71 | 640.25       | 2 |
| in vivo-OFF | 778   | 788  | TLmFVNISPLK             |                             |                    |          | 100.0%                  | 1261.71 | 632.79       | 2 |
| in vivo-OFF | 778   | 788  | TLmFVNISPLK             | M3 Oxidation                | 100%               | 1,000.00 | 100.0%                  | 1277.71 | 640.78       | 2 |
| in vivo-OFF | 778   | 788  | TLmFVNISPLK             |                             |                    |          | 100.0%                  | 1261.71 | 632.75       | 2 |
| in vivo-OFF | 778   | 788  | TLmFVNISPLK             |                             |                    |          | 100.0%                  | 1261.71 | 632.74       | 2 |
| in vivo-OFF | 778   | 788  | TLmFVNISPLK             |                             |                    |          | 100.0%                  | 1261.71 | 631.91       | 2 |
| in vivo-OFF | 778   | 788  | TLmFVNISPLK             | M3 Oxidation                | 100%               | 1,000.00 | 100.0%                  | 1277.71 | 639.97       | 2 |
| in vivo-OFF | 778   | 788  | TLmFVNISPLK             |                             |                    |          | 99.8%                   | 1261.71 | 632.68       | 2 |
| in vivo-OFF | 778   | 788  | TLmFVNISPLK             | M3 Oxidation                | 100%               | 1,000.00 | 100.0%                  | 1277.71 | 640.00       | 2 |
| in vivo-OFF | 778   | 788  | TLmFVNISPLK             | M3 Oxidation                | 100%               | 1,000.00 | 100.0%                  | 1277.71 | 640.72       | 2 |
| in vivo-OFF | 778   | 788  | TLmFVNISPLK             | M3 Oxidation                | 100%               | 1,000.00 | 100.0%                  | 1277.71 | 640.24       | 2 |
| in vivo-OFF | 778   | 788  | TLmFVNISPLK             |                             |                    |          | 99.3%                   | 1261.71 | 632.84       | 2 |
| in vivo-OFF | 778   | 788  | TLmFVNISPLK             | M3 Oxidation                | 100%               | 1,000.00 | 99.9%                   | 1277.71 | 640.26       | 2 |
| in vivo-OFF | 788   | 795  | KQHPETL                 |                             |                    |          | 99.8%                   | 950.52  | 476.22       | 2 |
| in vivo-OFF | 789   | 799  | QHVPETLcSLR             | C8 Iodoacetamide derivative | 100%               | 1,000.00 | 96.1%                   | 1338.67 | 670.77       | 2 |
| in vivo-OFF | 789   | 799  | QHVPETLcSLR             | C8 Iodoacetamide derivative | 100%               | 1,000.00 | 52.8%                   | 1338.67 | 670.84       | 2 |
| in vivo-OFF | 789   | 799  | QHVPETLcSLR             | C8 Iodoacetamide derivative | 100%               | 1,000.00 | 93.7%                   | 1338.67 | 670.63       | 2 |
| in vivo-OFF | 800   | 803  | FATK                    |                             |                    |          | 52.6%                   | 465.26  | 466.41       | 1 |
| in vivo-OFF | 804   | 813  | VNNTQIGTAR              |                             |                    |          | 100.0%                  | 1072.56 | 537.47       | 2 |
| in vivo-OFF | 804   | 813  | VNNTQIGTAR              |                             |                    |          | 100.0%                  | 1072.56 | 537.62       | 2 |
| in vivo-OFF | 804   | 813  | VNNTQIGTAR              |                             |                    |          | 100.0%                  | 1072.56 | 537.75       | 2 |
| in vivo-ON  | 266   | 288  | VmETAELQHQAELQDFASNIEQK | M2 Oxidation                | 100%               | 1,000.00 | 100.0%                  | 2674.25 | 893.12       | 3 |
| in vivo-ON  | 266   | 288  | VMETAELQHQAELQDFASNIEQK |                             |                    |          | 100.0%                  | 2658.26 | 887.83       | 3 |
| in vivo-ON  | 266   | 288  | VMETAELQHQAELQDFASNIEQK |                             |                    |          | 100.0%                  | 2658.26 | 887.39       | 3 |
| in vivo-ON  | 266   | 288  | VmETAELQHQAELQDFASNIEQK | M2 Oxidation                | 100%               | 1,000.00 | 100.0%                  | 2674.25 | 1339.04      | 2 |
| in vivo-ON  | 266   | 288  | VMETAELQHQAELQDFASNIEQK |                             |                    |          | 100.0%                  | 2658.26 | 887.90       | 3 |
| in vivo-ON  | 266   | 288  | VMETAELQHQAELQDFASNIEQK |                             |                    |          | 100.0%                  | 2658.26 | 887.38       | 3 |
| in vivo-ON  | 266   | 288  | VMETAELQHQAELQDFASNIEQK |                             |                    |          | 100.0%                  | 2658.26 | 887.55       | 3 |
| in vivo-ON  | 266   | 288  | VmETAELQHQAELQDFASNIEQK | M2 Oxidation                | 100%               | 1,000.00 | 99.7%                   | 2674.25 | 892.76       | 3 |
| in vivo-ON  | 266   | 288  | VmETAELQHQAELQDFASNIEQK | M2 Oxidation                | 100%               | 1,000.00 | 100.0%                  | 2674.25 | 1338.56      | 2 |
| in vivo-ON  | 266   | 288  | VMETAELQHQAELQDFASNIEQK |                             |                    |          | 56.2%                   | 2658.26 | 887.59       | 3 |

Table S2

| Where      | Start | Stop | Peptide Sequence         | Variable Modifications                  | Localization Prob. | Ascore       | Scaffold: Peptide Prob. | Mass    | Observed m/z | Z |
|------------|-------|------|--------------------------|-----------------------------------------|--------------------|--------------|-------------------------|---------|--------------|---|
| in vivo-ON | 266   | 288  | VmETAELQHQAEQLQDFASNIEQK | M2 Oxidation                            | 100%               | 1,000.00     | 100.0%                  | 2674.25 | 892.84       | 3 |
| in vivo-ON | 266   | 288  | VMETAELQHQAEQLQDFASNIEQK |                                         |                    |              | 99.8%                   | 2658.26 | 887.66       | 3 |
| in vivo-ON | 266   | 288  | VMETAELQHQAEQLQDFASNIEQK |                                         |                    |              | 100.0%                  | 2658.26 | 887.50       | 3 |
| in vivo-ON | 266   | 288  | VMETAELQHQAEQLQDFASNIEQK |                                         |                    |              | 99.8%                   | 2658.26 | 887.85       | 3 |
| in vivo-ON | 266   | 288  | VMETAELQHQAEQLQDFASNIEQK |                                         |                    |              | 100.0%                  | 2658.26 | 887.38       | 3 |
| in vivo-ON | 274   | 288  | HQAEQLQDFASNIEQK         |                                         |                    |              | 100.0%                  | 1756.84 | 586.66       | 3 |
| in vivo-ON | 274   | 288  | HQAEQLQDFASNIEQK         |                                         |                    |              | 90.0%                   | 1756.84 | 586.65       | 3 |
| in vivo-ON | 289   | 297  | ANSLImEYK                | M6 Oxidation                            | 100%               | 1,000.00     | 99.8%                   | 1083.53 | 543.03       | 2 |
| in vivo-ON | 289   | 297  | ANSLImEYK                | M6 Oxidation                            | 100%               | 1,000.00     | 94.3%                   | 1083.53 | 543.02       | 2 |
| in vivo-ON | 289   | 297  | ANSLImEYK                | M6 Oxidation                            | 100%               | 1,000.00     | 95.9%                   | 1083.53 | 542.76       | 2 |
| in vivo-ON | 289   | 297  | ANSLImEYK                | M6 Oxidation                            | 100%               | 1,000.00     | 95.8%                   | 1083.53 | 542.96       | 2 |
| in vivo-ON | 289   | 297  | ANSLImEYK                | M6 Oxidation                            | 100%               | 1,000.00     | 99.8%                   | 1083.53 | 543.07       | 2 |
| in vivo-ON | 289   | 297  | ANSLImEYK                | M6 Oxidation                            | 100%               | 1,000.00     | 96.1%                   | 1083.53 | 542.97       | 2 |
| in vivo-ON | 289   | 297  | ANSLImEYK                | M6 Oxidation                            | 100%               | 1,000.00     | 99.9%                   | 1083.53 | 543.00       | 2 |
| in vivo-ON | 289   | 297  | ANSLImEYK                | M6 Oxidation                            | 100%               | 1,000.00     | 98.2%                   | 1083.53 | 543.01       | 2 |
| in vivo-ON | 289   | 297  | ANSLImEYK                | M6 Oxidation                            | 100%               | 1,000.00     | 99.2%                   | 1083.53 | 543.03       | 2 |
| in vivo-ON | 289   | 310  | ANSLIMEYKNEQLQSAEEHFHSHK |                                         |                    |              | 100.0%                  | 2604.23 | 869.87       | 3 |
| in vivo-ON | 289   | 310  | ANSLImEYKNEQLQSAEEHFHSHK | M6 Oxidation                            | 100%               | 1,000.00     | 100.0%                  | 2620.22 | 875.00       | 3 |
| in vivo-ON | 289   | 310  | ANSLIMEYKNEQLQSAEEHFHSHK |                                         |                    |              | 100.0%                  | 2604.23 | 869.36       | 3 |
| in vivo-ON | 289   | 310  | ANSLImEYKNEQLQSAEEHFHSHK | M6 Oxidation                            | 100%               | 1,000.00     | 100.0%                  | 2620.22 | 874.87       | 3 |
| in vivo-ON | 289   | 310  | ANSLImEYKNEQLQSAEEHFHSHK | M6 Oxidation                            | 100%               | 1,000.00     | 100.0%                  | 2620.22 | 874.85       | 3 |
| in vivo-ON | 289   | 310  | ANSLImEYKNEQLQSAEEHFHSHK | M6 Oxidation                            | 100%               | 1,000.00     | 100.0%                  | 2620.22 | 875.21       | 3 |
| in vivo-ON | 289   | 310  | ANSLIMEYKNEQLQSAEEHFHSHK |                                         |                    |              | 100.0%                  | 2604.23 | 869.61       | 3 |
| in vivo-ON | 289   | 310  | ANSLImEYKNEQLQSAEEHFHSHK | M6 Oxidation                            | 100%               | 1,000.00     | 100.0%                  | 2620.22 | 874.91       | 3 |
| in vivo-ON | 289   | 310  | ANSLIMEYKNEQLQSAEEHFHSHK |                                         |                    |              | 100.0%                  | 2604.23 | 869.49       | 3 |
| in vivo-ON | 289   | 310  | ANSLIMEYKNEQLQSAEEHFHSHK |                                         |                    |              | 100.0%                  | 2604.23 | 869.71       | 3 |
| in vivo-ON | 289   | 310  | ANSLImEYKNEQLQSAEEHFHSHK | M6 Oxidation                            | 100%               | 1,000.00     | 100.0%                  | 2620.22 | 874.90       | 3 |
| in vivo-ON | 289   | 310  | ANSLIMEYKNEQLQSAEEHFHSHK |                                         |                    |              | 100.0%                  | 2604.23 | 869.66       | 3 |
| in vivo-ON | 289   | 310  | ANSLIMEYKNEQLQSAEEHFHSHK |                                         |                    |              | 100.0%                  | 2604.23 | 869.10       | 3 |
| in vivo-ON | 289   | 310  | ANSLImEYKNEQLQSAEEHFHSHK | M6 Oxidation                            | 100%               | 1,000.00     | 100.0%                  | 2620.22 | 874.87       | 3 |
| in vivo-ON | 289   | 310  | ANSLImEYKNEQLQSAEEHFHSHK | M6 Oxidation                            | 100%               | 1,000.00     | 100.0%                  | 2620.22 | 874.80       | 3 |
| in vivo-ON | 289   | 310  | ANSLIMEYKNEQLQSAEEHFHSHK |                                         |                    |              | 100.0%                  | 2604.23 | 869.73       | 3 |
| in vivo-ON | 289   | 310  | ANSLIMEYKNEQLQSAEEHFHSHK |                                         |                    |              | 100.0%                  | 2604.23 | 869.68       | 3 |
| in vivo-ON | 289   | 310  | ANSLImEYKNEQLQSAEEHFHSHK | M6 Oxidation                            | 100%               | 1,000.00     | 96.7%                   | 2620.22 | 874.32       | 3 |
| in vivo-ON | 289   | 310  | ANSLIMEYKNEQLQSAEEHFHSHK | Y8 Phosphorylation, S14 Phosphorylation | 94%, 99%           | 18.61, 26.28 | 60.0%                   | 2764.16 | 922.58       | 3 |
| in vivo-ON | 289   | 297  | ANSLIMEYK                |                                         |                    |              | 100.0%                  | 1067.53 | 1068.60      | 1 |
| in vivo-ON | 289   | 297  | ANSLIMEYK                |                                         |                    |              | 99.2%                   | 1067.53 | 1069.66      | 1 |
| in vivo-ON | 289   | 310  | ANSLIMEYKNEQLQSAEEHFHSHK |                                         |                    |              | 100.0%                  | 2604.23 | 869.57       | 3 |
| in vivo-ON | 289   | 297  | ANSLIMEYK                |                                         |                    |              | 100.0%                  | 1067.53 | 1068.63      | 1 |
| in vivo-ON | 289   | 310  | ANSLImEYKNEQLQSAEEHFHSHK | M6 Oxidation                            | 100%               | 1,000.00     | 98.7%                   | 2620.22 | 874.83       | 3 |
| in vivo-ON | 289   | 310  | ANSLImEYKNEQLQSAEEHFHSHK | M6 Oxidation                            | 100%               | 1,000.00     | 51.9%                   | 2620.22 | 874.94       | 3 |
| in vivo-ON | 293   | 296  | IMEY                     |                                         |                    |              | 79.8%                   | 554.24  | 555.17       | 1 |
| in vivo-ON | 297   | 307  | KNELQSAEEHF              |                                         |                    |              | 100.0%                  | 1330.62 | 666.17       | 2 |
| in vivo-ON | 297   | 307  | KNELQSAEEHF              |                                         |                    |              | 100.0%                  | 1330.62 | 666.60       | 2 |
| in vivo-ON | 297   | 307  | KNELQSAEEHF              |                                         |                    |              | 100.0%                  | 1330.62 | 666.57       | 2 |
| in vivo-ON | 297   | 307  | KNELQSAEEHF              |                                         |                    |              | 100.0%                  | 1330.62 | 666.32       | 2 |
| in vivo-ON | 297   | 307  | KNELQSAEEHF              |                                         |                    |              | 99.7%                   | 1330.62 | 666.59       | 2 |
| in vivo-ON | 297   | 307  | KNELQSAEEHF              |                                         |                    |              | 100.0%                  | 1330.62 | 444.91       | 3 |
| in vivo-ON | 297   | 307  | KNELQSAEEHF              |                                         |                    |              | 100.0%                  | 1330.62 | 444.87       | 3 |
| in vivo-ON | 297   | 307  | KNELQSAEEHF              |                                         |                    |              | 96.0%                   | 1330.62 | 444.97       | 3 |
| in vivo-ON | 297   | 307  | KNELQSAEEHF              |                                         |                    |              | 99.9%                   | 1330.62 | 444.97       | 3 |
| in vivo-ON | 297   | 307  | KNELQSAEEHF              |                                         |                    |              | 100.0%                  | 1330.62 | 444.91       | 3 |
| in vivo-ON | 297   | 307  | KNELQSAEEHF              |                                         |                    |              | 78.2%                   | 1330.62 | 666.33       | 2 |
| in vivo-ON | 298   | 307  | NELQSAEEHF               |                                         |                    |              | 99.6%                   | 1202.52 | 602.12       | 2 |
| in vivo-ON | 298   | 307  | NELQSAEEHF               |                                         |                    |              | 84.1%                   | 1202.52 | 602.09       | 2 |
| in vivo-ON | 298   | 307  | NELQSAEEHF               |                                         |                    |              | 71.1%                   | 1202.52 | 601.64       | 2 |
| in vivo-ON | 298   | 310  | NELQSAEEHFHSHK           |                                         |                    |              | 100.0%                  | 1554.71 | 778.27       | 2 |
| in vivo-ON | 298   | 310  | NELQSAEEHFHSHK           |                                         |                    |              | 100.0%                  | 1554.71 | 778.60       | 2 |

Table S2

| Where      | Start | Stop | Peptide Sequence | Variable Modifications | Localization Prob. | Ascore   | Scaffold: Peptide Prob. | Mass    | Observed m/z | Z |
|------------|-------|------|------------------|------------------------|--------------------|----------|-------------------------|---------|--------------|---|
| in vivo-ON | 298   | 310  | NELQSAEEHFESHK   |                        |                    |          | 100.0%                  | 1554.71 | 778.57       | 2 |
| in vivo-ON | 298   | 310  | NELQSAEEHFESHK   |                        |                    |          | 100.0%                  | 1554.71 | 778.33       | 2 |
| in vivo-ON | 298   | 310  | NELQSAEEHFESHK   |                        |                    |          | 100.0%                  | 1554.71 | 778.67       | 2 |
| in vivo-ON | 298   | 310  | NELQSAEEHFESHK   |                        |                    |          | 100.0%                  | 1554.71 | 778.69       | 2 |
| in vivo-ON | 298   | 310  | NELQSAEEHFESHK   |                        |                    |          | 99.9%                   | 1554.71 | 778.38       | 2 |
| in vivo-ON | 298   | 307  | NELQSAEEHF       |                        |                    |          | 96.4%                   | 1202.52 | 602.60       | 2 |
| in vivo-ON | 298   | 310  | NELQSAEEHFESHK   |                        |                    |          | 100.0%                  | 1554.71 | 778.40       | 2 |
| in vivo-ON | 298   | 310  | NELQSAEEHFESHK   |                        |                    |          | 100.0%                  | 1554.71 | 778.73       | 2 |
| in vivo-ON | 298   | 310  | NELQSAEEHFESHK   |                        |                    |          | 100.0%                  | 1554.71 | 779.36       | 2 |
| in vivo-ON | 298   | 310  | NELQSAEEHFESHK   |                        |                    |          | 100.0%                  | 1554.71 | 778.71       | 2 |
| in vivo-ON | 298   | 310  | NELQSAEEHFESHK   |                        |                    |          | 100.0%                  | 1554.71 | 778.76       | 2 |
| in vivo-ON | 298   | 310  | NELQSAEEHFESHK   |                        |                    |          | 100.0%                  | 1554.71 | 778.80       | 2 |
| in vivo-ON | 311   | 321  | IKELTSENELK      |                        |                    |          | 100.0%                  | 1302.70 | 652.64       | 2 |
| in vivo-ON | 311   | 321  | IKELTSENELK      |                        |                    |          | 100.0%                  | 1302.70 | 652.66       | 2 |
| in vivo-ON | 311   | 321  | IKELTSENELK      |                        |                    |          | 100.0%                  | 1302.70 | 652.63       | 2 |
| in vivo-ON | 311   | 321  | IKELTSENELK      |                        |                    |          | 100.0%                  | 1302.70 | 652.67       | 2 |
| in vivo-ON | 311   | 321  | IKELTSENELK      |                        |                    |          | 99.6%                   | 1302.70 | 653.12       | 2 |
| in vivo-ON | 311   | 321  | IKELTSENELK      |                        |                    |          | 100.0%                  | 1302.70 | 435.61       | 3 |
| in vivo-ON | 311   | 321  | IKELTSENELK      |                        |                    |          | 100.0%                  | 1302.70 | 435.68       | 3 |
| in vivo-ON | 311   | 321  | IKELTSENELK      |                        |                    |          | 100.0%                  | 1302.70 | 435.59       | 3 |
| in vivo-ON | 311   | 321  | IKELTSENELK      |                        |                    |          | 99.9%                   | 1302.70 | 435.45       | 3 |
| in vivo-ON | 311   | 321  | IKELTSENELK      |                        |                    |          | 98.5%                   | 1302.70 | 435.65       | 3 |
| in vivo-ON | 311   | 321  | IKELTSENELK      |                        |                    |          | 99.8%                   | 1302.70 | 435.58       | 3 |
| in vivo-ON | 311   | 321  | IKELTSENELK      |                        |                    |          | 100.0%                  | 1302.70 | 652.66       | 2 |
| in vivo-ON | 311   | 321  | IKELTSENELK      |                        |                    |          | 100.0%                  | 1302.70 | 652.62       | 2 |
| in vivo-ON | 311   | 321  | IKELTSENELK      |                        |                    |          | 100.0%                  | 1302.70 | 652.65       | 2 |
| in vivo-ON | 311   | 321  | IKELTSENELK      |                        |                    |          | 99.8%                   | 1302.70 | 652.42       | 2 |
| in vivo-ON | 311   | 321  | IKELTSENELK      |                        |                    |          | 100.0%                  | 1302.70 | 435.51       | 3 |
| in vivo-ON | 311   | 321  | IKELTSENELK      |                        |                    |          | 100.0%                  | 1302.70 | 435.56       | 3 |
| in vivo-ON | 311   | 321  | IKELTSENELK      |                        |                    |          | 100.0%                  | 1302.70 | 1303.73      | 1 |
| in vivo-ON | 313   | 321  | ELTSENELK        |                        |                    |          | 96.1%                   | 1061.52 | 532.83       | 2 |
| in vivo-ON | 325   | 334  | LQEEKDSSLK       |                        |                    |          | 100.0%                  | 1201.66 | 602.15       | 2 |
| in vivo-ON | 325   | 335  | LQEEKDSSLKK      |                        |                    |          | 100.0%                  | 1329.75 | 665.90       | 2 |
| in vivo-ON | 325   | 335  | LQEEKDSSLKK      |                        |                    |          | 100.0%                  | 1329.75 | 666.18       | 2 |
| in vivo-ON | 325   | 335  | LQEEKDSSLKK      |                        |                    |          | 100.0%                  | 1329.75 | 665.97       | 2 |
| in vivo-ON | 325   | 334  | LQEEKDSSLK       |                        |                    |          | 100.0%                  | 1201.66 | 602.61       | 2 |
| in vivo-ON | 325   | 335  | LQEEKDSSLKK      |                        |                    |          | 90.2%                   | 1329.75 | 444.64       | 3 |
| in vivo-ON | 325   | 335  | LQEEKDSSLKK      |                        |                    |          | 100.0%                  | 1329.75 | 444.49       | 3 |
| in vivo-ON | 325   | 335  | LQEEKDSSLKK      |                        |                    |          | 97.6%                   | 1329.75 | 444.88       | 3 |
| in vivo-ON | 325   | 335  | LQEEKDSSLKK      |                        |                    |          | 100.0%                  | 1329.75 | 444.72       | 3 |
| in vivo-ON | 325   | 335  | LQEEKDSSLKK      |                        |                    |          | 99.9%                   | 1329.75 | 444.35       | 3 |
| in vivo-ON | 325   | 335  | LQEEKDSSLKK      |                        |                    |          | 67.2%                   | 1329.75 | 444.64       | 3 |
| in vivo-ON | 325   | 334  | LQEEKDSSLK       |                        |                    |          | 74.6%                   | 1201.66 | 401.87       | 3 |
| in vivo-ON | 325   | 335  | LQEEKDSSLKK      |                        |                    |          | 87.8%                   | 1329.75 | 666.12       | 2 |
| in vivo-ON | 330   | 334  | DSSLK            |                        |                    |          | 58.0%                   | 574.33  | 575.34       | 1 |
| in vivo-ON | 334   | 342  | KKVQEGASL        |                        |                    |          | 81.0%                   | 958.54  | 480.32       | 2 |
| in vivo-ON | 335   | 346  | KVQEGASLAMQR     |                        |                    |          | 100.0%                  | 1316.69 | 659.72       | 2 |
| in vivo-ON | 335   | 346  | KVQEGASLAMQR     |                        |                    |          | 100.0%                  | 1316.69 | 659.48       | 2 |
| in vivo-ON | 335   | 346  | KVQEGASLAMQR     |                        |                    |          | 100.0%                  | 1316.69 | 659.73       | 2 |
| in vivo-ON | 335   | 346  | KVQEGASLAMQR     |                        |                    |          | 100.0%                  | 1316.69 | 659.36       | 2 |
| in vivo-ON | 335   | 346  | KVQEGASLAMQR     |                        |                    |          | 100.0%                  | 1316.69 | 659.73       | 2 |
| in vivo-ON | 335   | 346  | KVQEGASLAMQR     |                        |                    |          | 100.0%                  | 1316.69 | 659.40       | 2 |
| in vivo-ON | 335   | 346  | KVQEGASLAMQR     |                        |                    |          | 100.0%                  | 1316.69 | 659.81       | 2 |
| in vivo-ON | 335   | 346  | KVQEGASLAMQR     |                        |                    |          | 100.0%                  | 1316.69 | 659.70       | 2 |
| in vivo-ON | 335   | 346  | KVQEGASLAMQR     |                        |                    |          | 100.0%                  | 1316.69 | 440.25       | 3 |
| in vivo-ON | 335   | 346  | KVQEGASLAMQR     | M10 Oxidation          | 100%               | 1,000.00 | 100.0%                  | 1332.68 | 667.70       | 2 |
| in vivo-ON | 335   | 346  | KVQEGASLAMQR     | M10 Oxidation          | 100%               | 1,000.00 | 100.0%                  | 1332.68 | 667.60       | 2 |
| in vivo-ON | 335   | 346  | KVQEGASLAMQR     | M10 Oxidation          | 100%               | 1,000.00 | 100.0%                  | 1332.68 | 667.78       | 2 |

Table S2

| Where      | Start | Stop | Peptide Sequence        | Variable Modifications | Localization Prob. | Ascore   | Scaffold: Peptide Prob. | Mass    | Observed m/z | Z |
|------------|-------|------|-------------------------|------------------------|--------------------|----------|-------------------------|---------|--------------|---|
| in vivo-ON | 335   | 346  | KVQEGASLAmQR            | M10 Oxidation          | 100%               | 1,000.00 | 100.0%                  | 1332.68 | 668.41       | 2 |
| in vivo-ON | 335   | 346  | KVQEGASLAmQR            |                        |                    |          | 100.0%                  | 1316.69 | 440.18       | 3 |
| in vivo-ON | 335   | 346  | KVQEGASLAmQR            | M10 Oxidation          | 100%               | 1,000.00 | 100.0%                  | 1332.68 | 668.19       | 2 |
| in vivo-ON | 335   | 346  | KVQEGASLAmQR            | M10 Oxidation          | 100%               | 1,000.00 | 100.0%                  | 1332.68 | 667.68       | 2 |
| in vivo-ON | 335   | 346  | KVQEGASLAmQR            | M10 Oxidation          | 100%               | 1,000.00 | 100.0%                  | 1332.68 | 445.56       | 3 |
| in vivo-ON | 335   | 346  | KVQEGASLAmQR            | M10 Oxidation          | 100%               | 1,000.00 | 100.0%                  | 1332.68 | 668.17       | 2 |
| in vivo-ON | 335   | 346  | KVQEGASLAmQR            |                        |                    |          | 100.0%                  | 1316.69 | 440.39       | 3 |
| in vivo-ON | 335   | 346  | KVQEGASLAmQR            | M10 Oxidation          | 100%               | 1,000.00 | 100.0%                  | 1332.68 | 667.76       | 2 |
| in vivo-ON | 335   | 346  | KVQEGASLAmQR            | M10 Oxidation          | 100%               | 1,000.00 | 100.0%                  | 1332.68 | 445.95       | 3 |
| in vivo-ON | 335   | 346  | KVQEGASLAmQR            | M10 Oxidation          | 100%               | 1,000.00 | 100.0%                  | 1332.68 | 667.74       | 2 |
| in vivo-ON | 335   | 346  | KVQEGASLAmQR            |                        |                    |          | 100.0%                  | 1316.69 | 440.37       | 3 |
| in vivo-ON | 335   | 346  | KVQEGASLAmQR            | M10 Oxidation          | 100%               | 1,000.00 | 100.0%                  | 1332.68 | 445.65       | 3 |
| in vivo-ON | 335   | 346  | KVQEGASLAmQR            | M10 Oxidation          | 100%               | 1,000.00 | 99.7%                   | 1332.68 | 667.75       | 2 |
| in vivo-ON | 335   | 346  | KVQEGASLAmQR            | M10 Oxidation          | 100%               | 1,000.00 | 100.0%                  | 1332.68 | 445.82       | 3 |
| in vivo-ON | 335   | 346  | KVQEGASLAmQR            | M10 Oxidation          | 100%               | 1,000.00 | 100.0%                  | 1332.68 | 445.56       | 3 |
| in vivo-ON | 335   | 346  | KVQEGASLAmQR            |                        |                    |          | 100.0%                  | 1316.69 | 440.33       | 3 |
| in vivo-ON | 335   | 346  | KVQEGASLAmQR            | M10 Oxidation          | 100%               | 1,000.00 | 100.0%                  | 1332.68 | 445.73       | 3 |
| in vivo-ON | 335   | 346  | KVQEGASLAmQR            | M10 Oxidation          | 100%               | 1,000.00 | 72.2%                   | 1332.68 | 667.34       | 2 |
| in vivo-ON | 336   | 346  | VQEGASLAmQR             | M9 Oxidation           | 100%               | 1,000.00 | 100.0%                  | 1204.59 | 603.56       | 2 |
| in vivo-ON | 336   | 346  | VQEGASLAmQR             | M9 Oxidation           | 100%               | 1,000.00 | 100.0%                  | 1204.59 | 603.55       | 2 |
| in vivo-ON | 336   | 346  | VQEGASLAmQR             | M9 Oxidation           | 100%               | 1,000.00 | 100.0%                  | 1204.59 | 603.63       | 2 |
| in vivo-ON | 336   | 346  | VQEGASLAmQR             | M9 Oxidation           | 100%               | 1,000.00 | 100.0%                  | 1204.59 | 603.48       | 2 |
| in vivo-ON | 336   | 346  | VQEGASLAmQR             | M9 Oxidation           | 100%               | 1,000.00 | 100.0%                  | 1204.59 | 603.48       | 2 |
| in vivo-ON | 336   | 346  | VQEGASLAmQR             | M9 Oxidation           | 100%               | 1,000.00 | 100.0%                  | 1204.59 | 603.48       | 2 |
| in vivo-ON | 336   | 346  | VQEGASLAmQR             | M9 Oxidation           | 100%               | 1,000.00 | 100.0%                  | 1204.59 | 603.56       | 2 |
| in vivo-ON | 336   | 346  | VQEGASLAmQR             | M9 Oxidation           | 100%               | 1,000.00 | 100.0%                  | 1204.59 | 603.58       | 2 |
| in vivo-ON | 336   | 346  | VQEGASLAmQR             | M9 Oxidation           | 100%               | 1,000.00 | 100.0%                  | 1204.59 | 603.24       | 2 |
| in vivo-ON | 336   | 346  | VQEGASLAmQR             | M9 Oxidation           | 100%               | 1,000.00 | 100.0%                  | 1204.59 | 603.62       | 2 |
| in vivo-ON | 336   | 346  | VQEGASLAmQR             |                        |                    |          | 100.0%                  | 1188.59 | 595.62       | 2 |
| in vivo-ON | 336   | 346  | VQEGASLAmQR             |                        |                    |          | 100.0%                  | 1188.59 | 595.60       | 2 |
| in vivo-ON | 336   | 346  | VQEGASLAmQR             |                        |                    |          | 75.2%                   | 1188.59 | 596.50       | 2 |
| in vivo-ON | 347   | 355  | VQNKHDLEK               |                        |                    |          | 100.0%                  | 1109.58 | 556.10       | 2 |
| in vivo-ON | 347   | 355  | VQNKHDLEK               |                        |                    |          | 100.0%                  | 1109.58 | 556.05       | 2 |
| in vivo-ON | 347   | 355  | VQNKHDLEK               |                        |                    |          | 100.0%                  | 1109.58 | 556.04       | 2 |
| in vivo-ON | 347   | 355  | VQNKHDLEK               |                        |                    |          | 99.5%                   | 1109.58 | 556.18       | 2 |
| in vivo-ON | 347   | 355  | VQNKHDLEK               |                        |                    |          | 99.8%                   | 1109.58 | 556.06       | 2 |
| in vivo-ON | 347   | 355  | VQNKHDLEK               |                        |                    |          | 99.5%                   | 1109.58 | 555.95       | 2 |
| in vivo-ON | 351   | 373  | HDLEKKRLQSAIQPLQEENNSLK |                        |                    |          | 100.0%                  | 2717.45 | 906.80       | 3 |
| in vivo-ON | 351   | 373  | HDLEKKRLQSAIQPLQEENNSLK |                        |                    |          | 100.0%                  | 2717.45 | 906.85       | 3 |
| in vivo-ON | 351   | 373  | HDLEKKRLQSAIQPLQEENNSLK |                        |                    |          | 100.0%                  | 2717.45 | 907.22       | 3 |
| in vivo-ON | 351   | 373  | HDLEKKRLQSAIQPLQEENNSLK |                        |                    |          | 60.3%                   | 2717.45 | 907.43       | 3 |
| in vivo-ON | 351   | 373  | HDLEKKRLQSAIQPLQEENNSLK |                        |                    |          | 100.0%                  | 2717.45 | 906.74       | 3 |
| in vivo-ON | 351   | 373  | HDLEKKRLQSAIQPLQEENNSLK |                        |                    |          | 100.0%                  | 2717.45 | 906.81       | 3 |
| in vivo-ON | 357   | 373  | RLQSAIQPLQEENNSLK       |                        |                    |          | 100.0%                  | 1967.04 | 984.81       | 2 |
| in vivo-ON | 357   | 373  | RLQSAIQPLQEENNSLK       |                        |                    |          | 100.0%                  | 1967.04 | 984.88       | 2 |
| in vivo-ON | 357   | 373  | RLQSAIQPLQEENNSLK       |                        |                    |          | 100.0%                  | 1967.04 | 985.37       | 2 |
| in vivo-ON | 358   | 373  | LQSAIQPLQEENNSLK        |                        |                    |          | 100.0%                  | 1810.94 | 605.33       | 3 |
| in vivo-ON | 358   | 373  | LQSAIQPLQEENNSLK        |                        |                    |          | 100.0%                  | 1810.94 | 906.34       | 2 |
| in vivo-ON | 358   | 373  | LQSAIQPLQEENNSLK        |                        |                    |          | 100.0%                  | 1810.94 | 906.73       | 2 |
| in vivo-ON | 358   | 373  | LQSAIQPLQEENNSLK        |                        |                    |          | 100.0%                  | 1810.94 | 906.75       | 2 |
| in vivo-ON | 358   | 373  | LQSAIQPLQEENNSLK        |                        |                    |          | 100.0%                  | 1810.94 | 906.60       | 2 |
| in vivo-ON | 358   | 373  | LQSAIQPLQEENNSLK        |                        |                    |          | 100.0%                  | 1810.94 | 907.19       | 2 |
| in vivo-ON | 358   | 373  | LQSAIQPLQEENNSLK        |                        |                    |          | 95.8%                   | 1810.94 | 907.52       | 2 |
| in vivo-ON | 358   | 373  | LQSAIQPLQEENNSLK        |                        |                    |          | 100.0%                  | 1810.94 | 906.80       | 2 |
| in vivo-ON | 358   | 373  | LQSAIQPLQEENNSLK        |                        |                    |          | 93.7%                   | 1810.94 | 907.69       | 2 |
| in vivo-ON | 358   | 373  | LQSAIQPLQEENNSLK        |                        |                    |          | 100.0%                  | 1810.94 | 605.08       | 3 |
| in vivo-ON | 358   | 373  | LQSAIQPLQEENNSLK        |                        |                    |          | 100.0%                  | 1810.94 | 906.53       | 2 |
| in vivo-ON | 358   | 373  | LQSAIQPLQEENNSLK        |                        |                    |          | 100.0%                  | 1810.94 | 906.76       | 2 |
| in vivo-ON | 358   | 373  | LQSAIQPLQEENNSLK        |                        |                    |          | 100.0%                  | 1810.94 | 906.81       | 2 |

| Where      | Start | Stop | Peptide Sequence         | Variable Modifications | Localization Prob. | Ascore   | Scaffold: Peptide Prob. | Mass    | Observed m/z | Z |
|------------|-------|------|--------------------------|------------------------|--------------------|----------|-------------------------|---------|--------------|---|
| in vivo-ON | 358   | 373  | LQSAIQPLQEENNSLK         |                        |                    |          | 100.0%                  | 1810.94 | 906.85       | 2 |
| in vivo-ON | 358   | 373  | LQSAIQPLQEENNSLK         |                        |                    |          | 100.0%                  | 1810.94 | 906.77       | 2 |
| in vivo-ON | 358   | 373  | LQSAIQPLQEENNSLK         |                        |                    |          | 100.0%                  | 1810.94 | 906.64       | 2 |
| in vivo-ON | 358   | 381  | LQSAIQPLQEENNSLKQQIEQLQR |                        |                    |          | 100.0%                  | 2834.49 | 946.03       | 3 |
| in vivo-ON | 358   | 373  | LQSAIQPLQEENNSLK         |                        |                    |          | 97.8%                   | 1810.94 | 605.41       | 3 |
| in vivo-ON | 358   | 373  | LQSAIQPLQEENNSLK         |                        |                    |          | 100.0%                  | 1810.94 | 907.29       | 2 |
| in vivo-ON | 358   | 373  | LQSAIQPLQEENNSLK         |                        |                    |          | 89.9%                   | 1810.94 | 605.42       | 3 |
| in vivo-ON | 358   | 373  | LQSAIQPLQEENNSLK         |                        |                    |          | 100.0%                  | 1810.94 | 604.87       | 3 |
| in vivo-ON | 358   | 373  | LQSAIQPLQEENNSLK         |                        |                    |          | 100.0%                  | 1810.94 | 907.04       | 2 |
| in vivo-ON | 358   | 381  | LQSAIQPLQEENNSLKQQIEQLQR |                        |                    |          | 83.0%                   | 2834.49 | 946.64       | 3 |
| in vivo-ON | 358   | 381  | LQSAIQPLQEENNSLKQQIEQLQR |                        |                    |          | 100.0%                  | 2834.49 | 946.46       | 3 |
| in vivo-ON | 358   | 373  | LQSAIQPLQEENNSLK         |                        |                    |          | 100.0%                  | 1810.94 | 1812.08      | 1 |
| in vivo-ON | 374   | 381  | QQIEQLQR                 |                        |                    |          | 97.1%                   | 1041.56 | 1042.45      | 1 |
| in vivo-ON | 382   | 390  | ELASETVVK                |                        |                    |          | 95.2%                   | 974.53  | 488.58       | 2 |
| in vivo-ON | 382   | 390  | ELASETVVK                |                        |                    |          | 98.2%                   | 974.53  | 488.53       | 2 |
| in vivo-ON | 382   | 394  | ELASETVVKENLK            |                        |                    |          | 96.7%                   | 1458.79 | 487.69       | 3 |
| in vivo-ON | 382   | 394  | ELASETVVKENLK            |                        |                    |          | 100.0%                  | 1458.79 | 730.78       | 2 |
| in vivo-ON | 382   | 394  | ELASETVVKENLK            |                        |                    |          | 100.0%                  | 1458.79 | 731.35       | 2 |
| in vivo-ON | 395   | 406  | SSLDQQSANVQK             |                        |                    |          | 71.1%                   | 1303.64 | 653.31       | 2 |
| in vivo-ON | 395   | 406  | SSLDQQSANVQK             |                        |                    |          | 100.0%                  | 1303.64 | 653.08       | 2 |
| in vivo-ON | 395   | 406  | SSLDQQSANVQK             |                        |                    |          | 100.0%                  | 1303.64 | 653.04       | 2 |
| in vivo-ON | 395   | 406  | SSLDQQSANVQK             |                        |                    |          | 99.9%                   | 1303.64 | 652.63       | 2 |
| in vivo-ON | 395   | 406  | SSLDQQSANVQK             |                        |                    |          | 99.8%                   | 1303.64 | 652.64       | 2 |
| in vivo-ON | 395   | 412  | SSLDQQSANVQKLESTNR       |                        |                    |          | 100.0%                  | 2003.99 | 669.43       | 3 |
| in vivo-ON | 395   | 412  | SSLDQQSANVQKLESTNR       |                        |                    |          | 100.0%                  | 2003.99 | 669.08       | 3 |
| in vivo-ON | 398   | 406  | DQQSANVQK                |                        |                    |          | 84.9%                   | 1016.49 | 509.21       | 2 |
| in vivo-ON | 413   | 419  | ALESTIK                  |                        |                    |          | 99.0%                   | 760.43  | 761.46       | 1 |
| in vivo-ON | 413   | 419  | ALESTIK                  |                        |                    |          | 92.9%                   | 760.43  | 761.46       | 1 |
| in vivo-ON | 413   | 419  | ALESTIK                  |                        |                    |          | 69.3%                   | 760.43  | 761.56       | 1 |
| in vivo-ON | 420   | 429  | TLEEDVYtMk               | M9 Oxidation           | 100%               | 1,000.00 | 98.0%                   | 1243.56 | 623.07       | 2 |
| in vivo-ON | 420   | 429  | TLEEDVYtMk               | M9 Oxidation           | 100%               | 1,000.00 | 100.0%                  | 1243.56 | 622.85       | 2 |
| in vivo-ON | 420   | 429  | TLEEDVYtMk               | M9 Oxidation           | 100%               | 1,000.00 | 100.0%                  | 1243.56 | 623.53       | 2 |
| in vivo-ON | 420   | 429  | TLEEDVYtMk               | M9 Oxidation           | 100%               | 1,000.00 | 100.0%                  | 1243.56 | 1244.45      | 1 |
| in vivo-ON | 420   | 429  | TLEEDVYtMk               |                        |                    |          | 100.0%                  | 1227.57 | 615.11       | 2 |
| in vivo-ON | 432   | 440  | IIELEGILK                |                        |                    |          | 100.0%                  | 1026.63 | 1027.61      | 1 |
| in vivo-ON | 432   | 440  | IIELEGILK                |                        |                    |          | 100.0%                  | 1026.63 | 1027.62      | 1 |
| in vivo-ON | 432   | 440  | IIELEGILK                |                        |                    |          | 90.4%                   | 1026.63 | 514.63       | 2 |
| in vivo-ON | 432   | 440  | IIELEGILK                |                        |                    |          | 85.9%                   | 1026.63 | 514.62       | 2 |
| in vivo-ON | 432   | 440  | IIELEGILK                |                        |                    |          | 99.6%                   | 1026.63 | 514.37       | 2 |
| in vivo-ON | 432   | 440  | IIELEGILK                |                        |                    |          | 100.0%                  | 1026.63 | 514.58       | 2 |
| in vivo-ON | 432   | 440  | IIELEGILK                |                        |                    |          | 100.0%                  | 1026.63 | 514.38       | 2 |
| in vivo-ON | 432   | 440  | IIELEGILK                |                        |                    |          | 100.0%                  | 1026.63 | 514.62       | 2 |
| in vivo-ON | 432   | 440  | IIELEGILK                |                        |                    |          | 92.5%                   | 1026.63 | 514.35       | 2 |
| in vivo-ON | 432   | 440  | IIELEGILK                |                        |                    |          | 99.0%                   | 1026.63 | 514.56       | 2 |
| in vivo-ON | 432   | 440  | IIELEGILK                |                        |                    |          | 98.7%                   | 1026.63 | 514.62       | 2 |
| in vivo-ON | 432   | 440  | IIELEGILK                |                        |                    |          | 99.9%                   | 1026.63 | 514.59       | 2 |
| in vivo-ON | 432   | 440  | IIELEGILK                |                        |                    |          | 97.0%                   | 1026.63 | 514.54       | 2 |
| in vivo-ON | 432   | 440  | IIELEGILK                |                        |                    |          | 99.5%                   | 1026.63 | 514.47       | 2 |
| in vivo-ON | 432   | 440  | IIELEGILK                |                        |                    |          | 88.4%                   | 1026.63 | 514.36       | 2 |
| in vivo-ON | 432   | 440  | IIELEGILK                |                        |                    |          | 97.7%                   | 1026.63 | 514.32       | 2 |
| in vivo-ON | 432   | 440  | IIELEGILK                |                        |                    |          | 96.8%                   | 1026.63 | 514.34       | 2 |
| in vivo-ON | 432   | 440  | IIELEGILK                |                        |                    |          | 97.2%                   | 1026.63 | 514.25       | 2 |
| in vivo-ON | 432   | 440  | IIELEGILK                |                        |                    |          | 100.0%                  | 1026.63 | 514.67       | 2 |
| in vivo-ON | 432   | 440  | IIELEGILK                |                        |                    |          | 100.0%                  | 1026.63 | 514.33       | 2 |
| in vivo-ON | 432   | 440  | IIELEGILK                |                        |                    |          | 100.0%                  | 1026.63 | 514.42       | 2 |
| in vivo-ON | 432   | 440  | IIELEGILK                |                        |                    |          | 100.0%                  | 1026.63 | 514.74       | 2 |
| in vivo-ON | 432   | 440  | IIELEGILK                |                        |                    |          | 100.0%                  | 1026.63 | 514.71       | 2 |
| in vivo-ON | 432   | 440  | IIELEGILK                |                        |                    |          | 100.0%                  | 1026.63 | 515.23       | 2 |

Table S2

| Where      | Start | Stop | Peptide Sequence | Variable Modifications | Localization Prob. | Ascore | Scaffold: Peptide Prob. | Mass    | Observed m/z | Z |
|------------|-------|------|------------------|------------------------|--------------------|--------|-------------------------|---------|--------------|---|
| in vivo-ON | 432   | 440  | IIELEGILK        |                        |                    |        | 100.0%                  | 1026.63 | 514.71       | 2 |
| in vivo-ON | 432   | 440  | IIELEGILK        |                        |                    |        | 100.0%                  | 1026.63 | 514.70       | 2 |
| in vivo-ON | 432   | 440  | IIELEGILK        |                        |                    |        | 100.0%                  | 1026.63 | 514.69       | 2 |
| in vivo-ON | 432   | 440  | IIELEGILK        |                        |                    |        | 100.0%                  | 1026.63 | 515.20       | 2 |
| in vivo-ON | 432   | 440  | IIELEGILK        |                        |                    |        | 100.0%                  | 1026.63 | 514.68       | 2 |
| in vivo-ON | 432   | 440  | IIELEGILK        |                        |                    |        | 100.0%                  | 1026.63 | 514.68       | 2 |
| in vivo-ON | 432   | 440  | IIELEGILK        |                        |                    |        | 100.0%                  | 1026.63 | 514.65       | 2 |
| in vivo-ON | 432   | 440  | IIELEGILK        |                        |                    |        | 100.0%                  | 1026.63 | 514.70       | 2 |
| in vivo-ON | 432   | 440  | IIELEGILK        |                        |                    |        | 100.0%                  | 1026.63 | 514.71       | 2 |
| in vivo-ON | 432   | 440  | IIELEGILK        |                        |                    |        | 100.0%                  | 1026.63 | 514.79       | 2 |
| in vivo-ON | 432   | 440  | IIELEGILK        |                        |                    |        | 98.9%                   | 1026.63 | 514.70       | 2 |
| in vivo-ON | 432   | 440  | IIELEGILK        |                        |                    |        | 99.9%                   | 1026.63 | 514.29       | 2 |
| in vivo-ON | 432   | 440  | IIELEGILK        |                        |                    |        | 99.7%                   | 1026.63 | 514.69       | 2 |
| in vivo-ON | 447   | 452  | DGLVEK           |                        |                    |        | 100.0%                  | 659.35  | 660.46       | 1 |
| in vivo-ON | 447   | 452  | DGLVEK           |                        |                    |        | 84.7%                   | 659.35  | 660.60       | 1 |
| in vivo-ON | 453   | 460  | LIAEETLR         |                        |                    |        | 100.0%                  | 943.53  | 473.04       | 2 |
| in vivo-ON | 453   | 460  | LIAEETLR         |                        |                    |        | 100.0%                  | 943.53  | 472.85       | 2 |
| in vivo-ON | 453   | 460  | LIAEETLR         |                        |                    |        | 100.0%                  | 943.53  | 472.76       | 2 |
| in vivo-ON | 453   | 460  | LIAEETLR         |                        |                    |        | 100.0%                  | 943.53  | 472.83       | 2 |
| in vivo-ON | 453   | 460  | LIAEETLR         |                        |                    |        | 100.0%                  | 943.53  | 472.81       | 2 |
| in vivo-ON | 453   | 460  | LIAEETLR         |                        |                    |        | 100.0%                  | 943.53  | 472.86       | 2 |
| in vivo-ON | 453   | 460  | LIAEETLR         |                        |                    |        | 100.0%                  | 943.53  | 472.77       | 2 |
| in vivo-ON | 453   | 460  | LIAEETLR         |                        |                    |        | 99.9%                   | 943.53  | 472.59       | 2 |
| in vivo-ON | 453   | 460  | LIAEETLR         |                        |                    |        | 100.0%                  | 943.53  | 944.46       | 1 |
| in vivo-ON | 453   | 460  | LIAEETLR         |                        |                    |        | 100.0%                  | 943.53  | 944.50       | 1 |
| in vivo-ON | 453   | 461  | LIAEETLRR        |                        |                    |        | 86.4%                   | 1099.64 | 551.14       | 2 |
| in vivo-ON | 453   | 461  | LIAEETLRR        |                        |                    |        | 81.0%                   | 1099.64 | 551.23       | 2 |
| in vivo-ON | 453   | 461  | LIAEETLRR        |                        |                    |        | 73.5%                   | 1099.64 | 551.20       | 2 |
| in vivo-ON | 453   | 460  | LIAEETLR         |                        |                    |        | 100.0%                  | 943.53  | 473.02       | 2 |
| in vivo-ON | 453   | 460  | LIAEETLR         |                        |                    |        | 100.0%                  | 943.53  | 473.06       | 2 |
| in vivo-ON | 453   | 460  | LIAEETLR         |                        |                    |        | 100.0%                  | 943.53  | 472.86       | 2 |
| in vivo-ON | 453   | 460  | LIAEETLR         |                        |                    |        | 100.0%                  | 943.53  | 473.57       | 2 |
| in vivo-ON | 453   | 460  | LIAEETLR         |                        |                    |        | 99.9%                   | 943.53  | 945.64       | 1 |
| in vivo-ON | 453   | 460  | LIAEETLR         |                        |                    |        | 100.0%                  | 943.53  | 944.61       | 1 |
| in vivo-ON | 462   | 471  | KLHNTIQELK       |                        |                    |        | 99.6%                   | 1222.70 | 408.86       | 3 |
| in vivo-ON | 462   | 471  | KLHNTIQELK       |                        |                    |        | 100.0%                  | 1222.70 | 408.72       | 3 |
| in vivo-ON | 462   | 471  | KLHNTIQELK       |                        |                    |        | 100.0%                  | 1222.70 | 408.63       | 3 |
| in vivo-ON | 462   | 471  | KLHNTIQELK       |                        |                    |        | 100.0%                  | 1222.70 | 408.90       | 3 |
| in vivo-ON | 462   | 471  | KLHNTIQELK       |                        |                    |        | 98.1%                   | 1222.70 | 612.18       | 2 |
| in vivo-ON | 462   | 471  | KLHNTIQELK       |                        |                    |        | 100.0%                  | 1222.70 | 612.75       | 2 |
| in vivo-ON | 462   | 471  | KLHNTIQELK       |                        |                    |        | 100.0%                  | 1222.70 | 612.70       | 2 |
| in vivo-ON | 462   | 471  | KLHNTIQELK       |                        |                    |        | 100.0%                  | 1222.70 | 612.63       | 2 |
| in vivo-ON | 462   | 471  | KLHNTIQELK       |                        |                    |        | 100.0%                  | 1222.70 | 612.73       | 2 |
| in vivo-ON | 462   | 471  | KLHNTIQELK       |                        |                    |        | 100.0%                  | 1222.70 | 612.64       | 2 |
| in vivo-ON | 462   | 471  | KLHNTIQELK       |                        |                    |        | 100.0%                  | 1222.70 | 612.73       | 2 |
| in vivo-ON | 462   | 471  | KLHNTIQELK       |                        |                    |        | 100.0%                  | 1222.70 | 612.77       | 2 |
| in vivo-ON | 462   | 471  | KLHNTIQELK       |                        |                    |        | 100.0%                  | 1222.70 | 612.67       | 2 |
| in vivo-ON | 462   | 471  | KLHNTIQELK       |                        |                    |        | 100.0%                  | 1222.70 | 612.73       | 2 |
| in vivo-ON | 462   | 471  | KLHNTIQELK       |                        |                    |        | 100.0%                  | 1222.70 | 612.70       | 2 |
| in vivo-ON | 462   | 471  | KLHNTIQELK       |                        |                    |        | 100.0%                  | 1222.70 | 409.15       | 3 |
| in vivo-ON | 462   | 471  | KLHNTIQELK       |                        |                    |        | 100.0%                  | 1222.70 | 612.78       | 2 |
| in vivo-ON | 462   | 471  | KLHNTIQELK       |                        |                    |        | 100.0%                  | 1222.70 | 612.71       | 2 |
| in vivo-ON | 462   | 471  | KLHNTIQELK       |                        |                    |        | 100.0%                  | 1222.70 | 612.76       | 2 |
| in vivo-ON | 462   | 471  | KLHNTIQELK       |                        |                    |        | 100.0%                  | 1222.70 | 409.11       | 3 |
| in vivo-ON | 462   | 471  | KLHNTIQELK       |                        |                    |        | 100.0%                  | 1222.70 | 409.00       | 3 |
| in vivo-ON | 462   | 471  | KLHNTIQELK       |                        |                    |        | 100.0%                  | 1222.70 | 613.01       | 2 |
| in vivo-ON | 462   | 471  | KLHNTIQELK       |                        |                    |        | 100.0%                  | 1222.70 | 408.97       | 3 |
| in vivo-ON | 462   | 471  | KLHNTIQELK       |                        |                    |        | 100.0%                  | 1222.70 | 409.08       | 3 |

| Where      | Start | Stop | Peptide Sequence | Variable Modifications | Localization Prob. | Ascore | Scaffold: Peptide Prob. | Mass    | Observed m/z | Z |
|------------|-------|------|------------------|------------------------|--------------------|--------|-------------------------|---------|--------------|---|
| in vivo-ON | 462   | 471  | KLHNTIQELK       |                        |                    |        | 100.0%                  | 1222.70 | 408.85       | 3 |
| in vivo-ON | 462   | 471  | KLHNTIQELK       |                        |                    |        | 100.0%                  | 1222.70 | 408.94       | 3 |
| in vivo-ON | 462   | 471  | KLHNTIQELK       |                        |                    |        | 100.0%                  | 1222.70 | 409.04       | 3 |
| in vivo-ON | 462   | 471  | KLHNTIQELK       |                        |                    |        | 100.0%                  | 1222.70 | 612.82       | 2 |
| in vivo-ON | 462   | 471  | KLHNTIQELK       |                        |                    |        | 100.0%                  | 1222.70 | 409.03       | 3 |
| in vivo-ON | 462   | 471  | KLHNTIQELK       |                        |                    |        | 100.0%                  | 1222.70 | 408.82       | 3 |
| in vivo-ON | 462   | 471  | KLHNTIQELK       |                        |                    |        | 68.6%                   | 1222.70 | 612.37       | 2 |
| in vivo-ON | 462   | 471  | KLHNTIQELK       |                        |                    |        | 100.0%                  | 1222.70 | 409.02       | 3 |
| in vivo-ON | 462   | 471  | KLHNTIQELK       |                        |                    |        | 99.4%                   | 1222.70 | 409.03       | 3 |
| in vivo-ON | 462   | 471  | KLHNTIQELK       |                        |                    |        | 99.1%                   | 1222.70 | 613.00       | 2 |
| in vivo-ON | 462   | 471  | KLHNTIQELK       |                        |                    |        | 100.0%                  | 1222.70 | 613.15       | 2 |
| in vivo-ON | 462   | 471  | KLHNTIQELK       |                        |                    |        | 100.0%                  | 1222.70 | 408.72       | 3 |
| in vivo-ON | 462   | 471  | KLHNTIQELK       |                        |                    |        | 99.9%                   | 1222.70 | 612.66       | 2 |
| in vivo-ON | 462   | 471  | KLHNTIQELK       |                        |                    |        | 76.2%                   | 1222.70 | 408.90       | 3 |
| in vivo-ON | 462   | 471  | KLHNTIQELK       |                        |                    |        | 100.0%                  | 1222.70 | 408.77       | 3 |
| in vivo-ON | 462   | 471  | KLHNTIQELK       |                        |                    |        | 96.5%                   | 1222.70 | 612.41       | 2 |
| in vivo-ON | 462   | 471  | KLHNTIQELK       |                        |                    |        | 100.0%                  | 1222.70 | 409.06       | 3 |
| in vivo-ON | 462   | 471  | KLHNTIQELK       |                        |                    |        | 99.8%                   | 1222.70 | 612.45       | 2 |
| in vivo-ON | 462   | 471  | KLHNTIQELK       |                        |                    |        | 100.0%                  | 1222.70 | 409.06       | 3 |
| in vivo-ON | 462   | 471  | KLHNTIQELK       |                        |                    |        | 89.3%                   | 1222.70 | 408.93       | 3 |
| in vivo-ON | 462   | 471  | KLHNTIQELK       |                        |                    |        | 99.8%                   | 1222.70 | 612.46       | 2 |
| in vivo-ON | 462   | 471  | KLHNTIQELK       |                        |                    |        | 100.0%                  | 1222.70 | 409.09       | 3 |
| in vivo-ON | 462   | 471  | KLHNTIQELK       |                        |                    |        | 97.0%                   | 1222.70 | 408.97       | 3 |
| in vivo-ON | 462   | 471  | KLHNTIQELK       |                        |                    |        | 66.4%                   | 1222.70 | 613.39       | 2 |
| in vivo-ON | 462   | 471  | KLHNTIQELK       |                        |                    |        | 99.2%                   | 1222.70 | 409.04       | 3 |
| in vivo-ON | 462   | 471  | KLHNTIQELK       |                        |                    |        | 57.1%                   | 1222.70 | 612.65       | 2 |
| in vivo-ON | 462   | 471  | KLHNTIQELK       |                        |                    |        | 100.0%                  | 1222.70 | 612.47       | 2 |
| in vivo-ON | 462   | 471  | KLHNTIQELK       |                        |                    |        | 96.1%                   | 1222.70 | 409.14       | 3 |
| in vivo-ON | 462   | 471  | KLHNTIQELK       |                        |                    |        | 92.0%                   | 1222.70 | 408.96       | 3 |
| in vivo-ON | 462   | 471  | KLHNTIQELK       |                        |                    |        | 79.8%                   | 1222.70 | 612.74       | 2 |
| in vivo-ON | 462   | 471  | KLHNTIQELK       |                        |                    |        | 99.9%                   | 1222.70 | 612.82       | 2 |
| in vivo-ON | 463   | 471  | LHNTIQELK        |                        |                    |        | 100.0%                  | 1094.61 | 548.60       | 2 |
| in vivo-ON | 463   | 471  | LHNTIQELK        |                        |                    |        | 100.0%                  | 1094.61 | 548.54       | 2 |
| in vivo-ON | 463   | 471  | LHNTIQELK        |                        |                    |        | 100.0%                  | 1094.61 | 548.35       | 2 |
| in vivo-ON | 463   | 471  | LHNTIQELK        |                        |                    |        | 100.0%                  | 1094.61 | 548.33       | 2 |
| in vivo-ON | 463   | 471  | LHNTIQELK        |                        |                    |        | 100.0%                  | 1094.61 | 548.43       | 2 |
| in vivo-ON | 463   | 471  | LHNTIQELK        |                        |                    |        | 100.0%                  | 1094.61 | 548.60       | 2 |
| in vivo-ON | 463   | 471  | LHNTIQELK        |                        |                    |        | 100.0%                  | 1094.61 | 548.58       | 2 |
| in vivo-ON | 463   | 471  | LHNTIQELK        |                        |                    |        | 99.5%                   | 1094.61 | 548.61       | 2 |
| in vivo-ON | 463   | 471  | LHNTIQELK        |                        |                    |        | 99.4%                   | 1094.61 | 548.65       | 2 |
| in vivo-ON | 463   | 471  | LHNTIQELK        |                        |                    |        | 97.7%                   | 1094.61 | 548.61       | 2 |
| in vivo-ON | 463   | 471  | LHNTIQELK        |                        |                    |        | 100.0%                  | 1094.61 | 548.40       | 2 |
| in vivo-ON | 463   | 471  | LHNTIQELK        |                        |                    |        | 100.0%                  | 1094.61 | 548.64       | 2 |
| in vivo-ON | 463   | 471  | LHNTIQELK        |                        |                    |        | 100.0%                  | 1094.61 | 548.68       | 2 |
| in vivo-ON | 463   | 471  | LHNTIQELK        |                        |                    |        | 100.0%                  | 1094.61 | 548.68       | 2 |
| in vivo-ON | 463   | 471  | LHNTIQELK        |                        |                    |        | 100.0%                  | 1094.61 | 548.66       | 2 |
| in vivo-ON | 463   | 471  | LHNTIQELK        |                        |                    |        | 100.0%                  | 1094.61 | 549.24       | 2 |
| in vivo-ON | 463   | 471  | LHNTIQELK        |                        |                    |        | 100.0%                  | 1094.61 | 548.34       | 2 |
| in vivo-ON | 463   | 471  | LHNTIQELK        |                        |                    |        | 100.0%                  | 1094.61 | 548.37       | 2 |
| in vivo-ON | 463   | 471  | LHNTIQELK        |                        |                    |        | 100.0%                  | 1094.61 | 548.50       | 2 |
| in vivo-ON | 463   | 471  | LHNTIQELK        |                        |                    |        | 100.0%                  | 1094.61 | 548.70       | 2 |
| in vivo-ON | 463   | 471  | LHNTIQELK        |                        |                    |        | 100.0%                  | 1094.61 | 1095.67      | 1 |
| in vivo-ON | 463   | 471  | LHNTIQELK        |                        |                    |        | 98.1%                   | 1094.61 | 548.32       | 2 |
| in vivo-ON | 463   | 471  | LHNTIQELK        |                        |                    |        | 99.7%                   | 1094.61 | 548.72       | 2 |
| in vivo-ON | 463   | 471  | LHNTIQELK        |                        |                    |        | 99.9%                   | 1094.61 | 548.44       | 2 |
| in vivo-ON | 463   | 471  | LHNTIQELK        |                        |                    |        | 96.0%                   | 1094.61 | 548.65       | 2 |
| in vivo-ON | 463   | 471  | LHNTIQELK        |                        |                    |        | 100.0%                  | 1094.61 | 1095.71      | 1 |
| in vivo-ON | 476   | 479  | VFCR             |                        |                    |        | 55.3%                   | 523.26  | 524.28       | 1 |

| Where      | Start | Stop | Peptide Sequence                           | Variable Modifications                      | Localization Prob. | Ascore             | Scaffold: Peptide Prob. | Mass    | Observed m/z | Z |
|------------|-------|------|--------------------------------------------|---------------------------------------------|--------------------|--------------------|-------------------------|---------|--------------|---|
| in vivo-ON | 480   | 521  | VRPPLGDGESAQIAFPDQNSEASTIEIVAQAPGSSLTGNGIK |                                             |                    |                    | 100.0%                  | 4221.12 | 1408.07      | 3 |
| in vivo-ON | 480   | 521  | VRPPLGDGESAQIAFPDQNSEASTIEIVAQAPGSSLTGNGIK |                                             |                    |                    | 100.0%                  | 4221.12 | 1408.75      | 3 |
| in vivo-ON | 480   | 521  | VRPPLGDGESAQIAFPDQNSEASTIEIVAQAPGSSLTGNGIK |                                             |                    |                    | 100.0%                  | 4221.12 | 1408.33      | 3 |
| in vivo-ON | 480   | 521  | VRPPLGDGESAQIAFPDQNSEASTIEIVAQAPGSSLTGNGIK |                                             |                    |                    | 100.0%                  | 4221.12 | 1408.80      | 3 |
| in vivo-ON | 480   | 521  | VRPPLGDGESAQIAFPDQNSEASTIEIVAQAPGSSLTGNGIK |                                             |                    |                    | 100.0%                  | 4221.12 | 1408.15      | 3 |
| in vivo-ON | 480   | 521  | VRPPLGDGESAQIAFPDQNSEASTIEIVAQAPGSSLTGNGIK |                                             |                    |                    | 100.0%                  | 4221.12 | 1408.02      | 3 |
| in vivo-ON | 480   | 521  | VRPPLGDGESAQIAFPDQNSEASTIEIVAQAPGSSLTGNGIK |                                             |                    |                    | 56.8%                   | 4221.12 | 1408.62      | 3 |
| in vivo-ON | 480   | 521  | VRPPLGDGESAQIAFPDQNSEASTIEIVAQAPGSSLTGNGIK |                                             |                    |                    | 100.0%                  | 4221.12 | 1408.81      | 3 |
| in vivo-ON | 480   | 521  | VRPPLGDGESAQIAFPDQNSEASTIEIVAQAPGSSLTGNGIK |                                             |                    |                    | 99.9%                   | 4221.12 | 1408.10      | 3 |
| in vivo-ON | 480   | 521  | VRPPLGDGESAQIAFPDQNSEASTIEIVAQAPGSSLTGNGIK |                                             |                    |                    | 100.0%                  | 4221.12 | 1408.60      | 3 |
| in vivo-ON | 480   | 521  | VRPPLGDGESAQIAFPDQNSEASTIEIVAQAPGSSLTGNGIK |                                             |                    |                    | 99.2%                   | 4221.12 | 1408.58      | 3 |
| in vivo-ON | 480   | 521  | VRPPLGDGESAQIAFPDQNSEASTIEIVAQAPGSSLTGNGIK |                                             |                    |                    | 93.0%                   | 4221.12 | 1408.60      | 3 |
| in vivo-ON | 522   | 529  | QYAFNFDR                                   |                                             |                    |                    | 99.4%                   | 1059.48 | 531.42       | 2 |
| in vivo-ON | 522   | 529  | QYAFNFDR                                   |                                             |                    |                    | 99.3%                   | 1059.48 | 531.01       | 2 |
| in vivo-ON | 522   | 529  | QYAFNFDR                                   |                                             |                    |                    | 95.7%                   | 1059.48 | 531.01       | 2 |
| in vivo-ON | 522   | 529  | QYAFNFDR                                   |                                             |                    |                    | 98.6%                   | 1059.48 | 530.79       | 2 |
| in vivo-ON | 522   | 529  | QYAFNFDR                                   |                                             |                    |                    | 98.2%                   | 1059.48 | 531.09       | 2 |
| in vivo-ON | 522   | 529  | QYAFNFDR                                   |                                             |                    |                    | 76.3%                   | 1059.48 | 531.03       | 2 |
| in vivo-ON | 522   | 529  | QYAFNFDR                                   |                                             |                    |                    | 72.2%                   | 1059.48 | 531.04       | 2 |
| in vivo-ON | 522   | 529  | QYAFNFDR                                   |                                             |                    |                    | 50.1%                   | 1059.48 | 531.05       | 2 |
| in vivo-ON | 522   | 529  | QYAFNFDR                                   |                                             |                    |                    | 84.1%                   | 1059.48 | 531.12       | 2 |
| in vivo-ON | 522   | 529  | QYAFNFDR                                   |                                             |                    |                    | 75.4%                   | 1059.48 | 531.06       | 2 |
| in vivo-ON | 522   | 529  | QYAFNFDR                                   |                                             |                    |                    | 100.0%                  | 1059.48 | 531.18       | 2 |
| in vivo-ON | 522   | 529  | QYAFNFDR                                   |                                             |                    |                    | 99.2%                   | 1059.48 | 531.05       | 2 |
| in vivo-ON | 524   | 531  | AFNFDRVF                                   |                                             |                    |                    | 94.5%                   | 1014.49 | 508.57       | 2 |
| in vivo-ON | 530   | 569  | VFSPETTNEDEVNELSQLIQSAMDGYNVcIFAYGQTGSGK   | C29 Iodoacetamide derivative                | 100%               | 1,000.00           | 100.0%                  | 4416.02 | 1473.59      | 3 |
| in vivo-ON | 530   | 569  | VFSPETTNEDEVNELSQLIQSAMDGYNVcIFAYGQTGSGK   | C29 Iodoacetamide derivative                | 100%               | 1,000.00           | 100.0%                  | 4416.02 | 1473.52      | 3 |
| in vivo-ON | 530   | 569  | VFSPETTNEDEVNELSQLIQSAMDGYNVcIFAYGQTGSGK   | S21 Phosphorylation                         | 8%                 | 0                  | 99.1%                   | 4438.97 | 1480.59      | 3 |
| in vivo-ON | 530   | 569  | VFSPETTNEDEVNELSQLIQSAMDGYNVcIFAYGQTGSGK   | M23 Oxidation, C29 Iodoacetamide derivative | 100%, 100%         | 1,000.00, 1,000.00 | 86.2%                   | 4432.02 | 1479.13      | 3 |
| in vivo-ON | 570   | 585  | THTMSSNTGmIPSSVR                           | M10 Oxidation                               | 100%               | 81.36              | 100.0%                  | 1720.79 | 861.74       | 2 |
| in vivo-ON | 570   | 585  | THTMSSNTGmIPSSVR                           |                                             |                    |                    | 100.0%                  | 1704.79 | 854.26       | 2 |
| in vivo-ON | 570   | 585  | THTMSSNTGmIPSSVR                           |                                             |                    |                    | 100.0%                  | 1704.79 | 853.81       | 2 |
| in vivo-ON | 570   | 585  | THTMSSNTGmIPSSVR                           | M10 Oxidation                               | 100%               | 94.27              | 100.0%                  | 1720.79 | 861.74       | 2 |
| in vivo-ON | 570   | 585  | THTMSSNTGmIPSSVR                           |                                             |                    |                    | 100.0%                  | 1704.79 | 853.80       | 2 |
| in vivo-ON | 570   | 585  | THTMSSNTGmIPSSVR                           | M10 Oxidation                               | 100%               | 94.27              | 100.0%                  | 1720.79 | 861.77       | 2 |
| in vivo-ON | 570   | 585  | THTmSSNTGmIPSSVR                           | M4 Oxidation, M10 Oxidation                 | 100%, 100%         | 1,000.00, 1,000.00 | 100.0%                  | 1736.78 | 869.71       | 2 |
| in vivo-ON | 570   | 585  | THTMSSNTGmIPSSVR                           |                                             |                    |                    | 100.0%                  | 1704.79 | 854.35       | 2 |
| in vivo-ON | 570   | 585  | THTMSSNTGmIPSSVR                           |                                             |                    |                    | 100.0%                  | 1704.79 | 854.26       | 2 |
| in vivo-ON | 570   | 585  | THTmSSNTGmIPSSVR                           | M4 Oxidation                                | 100%               | 81.36              | 100.0%                  | 1720.79 | 861.86       | 2 |
| in vivo-ON | 570   | 585  | THTmSSNTGmIPSSVR                           | M4 Oxidation, M10 Oxidation                 | 100%, 100%         | 1,000.00, 1,000.00 | 100.0%                  | 1736.78 | 870.27       | 2 |
| in vivo-ON | 570   | 585  | THTmSSNTGmIPSSVR                           | M4 Oxidation, M10 Oxidation                 | 100%, 100%         | 1,000.00, 1,000.00 | 100.0%                  | 1736.78 | 869.81       | 2 |
| in vivo-ON | 570   | 585  | THTmSSNTGmIPSSVR                           | M4 Oxidation, M10 Oxidation                 | 100%, 100%         | 1,000.00, 1,000.00 | 100.0%                  | 1736.78 | 869.76       | 2 |
| in vivo-ON | 570   | 585  | THTMSSNTGmIPSSVR                           | M10 Oxidation                               | 100%               | 73.62              | 100.0%                  | 1720.79 | 574.50       | 3 |
| in vivo-ON | 570   | 585  | THTmSSNTGmIPSSVR                           | M4 Oxidation                                | 100%               | 102.87             | 100.0%                  | 1720.79 | 861.96       | 2 |
| in vivo-ON | 570   | 585  | THTmSSNTGmIPSSVR                           | M4 Oxidation, M10 Oxidation                 | 100%, 100%         | 1,000.00, 1,000.00 | 100.0%                  | 1736.78 | 870.33       | 2 |
| in vivo-ON | 570   | 585  | THTmSSNTGmIPSSVR                           | M4 Oxidation                                | 100%               | 121.05             | 100.0%                  | 1720.79 | 861.46       | 2 |
| in vivo-ON | 570   | 585  | THTMSSNTGmIPSSVR                           | M10 Oxidation                               | 100%               | 66.56              | 100.0%                  | 1720.79 | 861.87       | 2 |
| in vivo-ON | 570   | 585  | THTmSSNTGmIPSSVR                           | M4 Oxidation, M10 Oxidation                 | 100%, 100%         | 1,000.00, 1,000.00 | 100.0%                  | 1736.78 | 869.67       | 2 |
| in vivo-ON | 570   | 585  | THTMSSNTGmIPSSVR                           | M10 Oxidation                               | 100%               | 80.96              | 100.0%                  | 1720.79 | 575.16       | 3 |
| in vivo-ON | 570   | 585  | THTmSSNTGmIPSSVR                           | M4 Oxidation                                | 100%               | 84.46              | 100.0%                  | 1720.79 | 861.75       | 2 |
| in vivo-ON | 570   | 585  | THTmSSNTGmIPSSVR                           | M4 Oxidation                                | 100%               | 104.16             | 100.0%                  | 1720.79 | 861.50       | 2 |
| in vivo-ON | 570   | 585  | THTMSSNTGmIPSSVR                           | M10 Oxidation                               | 100%               | 67.8               | 100.0%                  | 1720.79 | 862.32       | 2 |
| in vivo-ON | 570   | 585  | THTmSSNTGmIPSSVR                           | M4 Oxidation, M10 Oxidation                 | 100%, 100%         | 1,000.00, 1,000.00 | 100.0%                  | 1736.78 | 869.78       | 2 |
| in vivo-ON | 570   | 585  | THTmSSNTGmIPSSVR                           | M4 Oxidation, M10 Oxidation                 | 100%, 100%         | 1,000.00, 1,000.00 | 100.0%                  | 1736.78 | 580.45       | 3 |
| in vivo-ON | 570   | 585  | THTMSSNTGmIPSSVR                           | M10 Oxidation                               | 100%               | 55.9               | 100.0%                  | 1720.79 | 575.33       | 3 |
| in vivo-ON | 570   | 585  | THTmSSNTGmIPSSVR                           | M4 Oxidation, M10 Oxidation                 | 100%, 100%         | 1,000.00, 1,000.00 | 100.0%                  | 1736.78 | 869.76       | 2 |
| in vivo-ON | 570   | 585  | THTmSSNTGmIPSSVR                           | M4 Oxidation, M10 Oxidation                 | 100%, 100%         | 1,000.00, 1,000.00 | 100.0%                  | 1736.78 | 869.76       | 2 |
| in vivo-ON | 570   | 585  | THTmSSNTGmIPSSVR                           | M4 Oxidation, M10 Oxidation                 | 100%, 100%         | 1,000.00, 1,000.00 | 100.0%                  | 1736.78 | 869.77       | 2 |

Table S2



| Where      | Start | Stop | Peptide Sequence             | Variable Modifications      | Localization Prob. | Ascore             | Scaffold: Peptide Prob. | Mass    | Observed m/z | Z |
|------------|-------|------|------------------------------|-----------------------------|--------------------|--------------------|-------------------------|---------|--------------|---|
| in vivo-ON | 570   | 585  | THTMSSNTGmIPSSVR             | M10 Oxidation               | 100%               | 71.79              | 100.0%                  | 1720.79 | 861.65       | 2 |
| in vivo-ON | 570   | 585  | THTMSSNTGmIPSSVR             | M10 Oxidation               | 100%               | 60.97              | 100.0%                  | 1720.79 | 575.18       | 3 |
| in vivo-ON | 570   | 585  | THTMSSNTGmIPSSVR             | M10 Oxidation               | 100%               | 67.8               | 100.0%                  | 1720.79 | 861.80       | 2 |
| in vivo-ON | 570   | 585  | THTmSSNTGmIPSSVR             | M4 Oxidation, M10 Oxidation | 100%, 100%         | 1,000.00, 1,000.00 | 100.0%                  | 1736.78 | 580.49       | 3 |
| in vivo-ON | 570   | 585  | THTmSSNTGmIPSSVR             | M4 Oxidation, M10 Oxidation | 100%, 100%         | 1,000.00, 1,000.00 | 100.0%                  | 1736.78 | 869.83       | 2 |
| in vivo-ON | 570   | 585  | THTmSSNTGmIPSSVR             | M4 Oxidation, M10 Oxidation | 100%, 100%         | 1,000.00, 1,000.00 | 100.0%                  | 1736.78 | 580.21       | 3 |
| in vivo-ON | 570   | 585  | THTMSSNTGmIPSSVR             | M10 Oxidation               | 100%               | 65.68              | 100.0%                  | 1720.79 | 575.06       | 3 |
| in vivo-ON | 570   | 585  | THTmSSNTGmIPSSVR             | M4 Oxidation                | 100%               | 41.75              | 100.0%                  | 1720.79 | 575.01       | 3 |
| in vivo-ON | 570   | 585  | THTmSSNTGmIPSSVR             | M4 Oxidation                | 100%               | 71.79              | 100.0%                  | 1720.79 | 861.86       | 2 |
| in vivo-ON | 570   | 585  | THTmSSNTGmIPSSVR             | M4 Oxidation, M10 Oxidation | 100%, 100%         | 1,000.00, 1,000.00 | 100.0%                  | 1736.78 | 869.51       | 2 |
| in vivo-ON | 570   | 585  | THTmSSNTGmIPSSVR             | M4 Oxidation                | 100%               | 60.1               | 100.0%                  | 1720.79 | 861.76       | 2 |
| in vivo-ON | 570   | 585  | THTmSSNTGmIPSSVR             | M4 Oxidation                | 100%               | 23.13              | 100.0%                  | 1720.79 | 861.77       | 2 |
| in vivo-ON | 570   | 585  | THTMSSNTGmIPSSVR             |                             |                    |                    | 100.0%                  | 1704.79 | 853.80       | 2 |
| in vivo-ON | 570   | 585  | THTMSSNTGmIPSSVR             | M10 Oxidation               | 100%               | 42.99              | 100.0%                  | 1720.79 | 861.75       | 2 |
| in vivo-ON | 570   | 585  | THTMSSNTGmIPSSVR             | M10 Oxidation               | 95%                | 10.83              | 97.6%                   | 1720.79 | 575.27       | 3 |
| in vivo-ON | 570   | 585  | THTmSSNTGmIPSSVR             | M4 Oxidation                | 100%               | 44.3               | 100.0%                  | 1720.79 | 861.91       | 2 |
| in vivo-ON | 570   | 585  | THTmSSNTGmIPSSVR             | M4 Oxidation, M10 Oxidation | 100%, 100%         | 1,000.00, 1,000.00 | 100.0%                  | 1736.78 | 580.06       | 3 |
| in vivo-ON | 570   | 585  | THTmSSNTGmIPSSVR             | M4 Oxidation, M10 Oxidation | 100%, 100%         | 1,000.00, 1,000.00 | 100.0%                  | 1736.78 | 580.12       | 3 |
| in vivo-ON | 570   | 585  | THTMSSNTGmIPSSVR             | M10 Oxidation               | 100%               | 32.67              | 99.7%                   | 1720.79 | 862.25       | 2 |
| in vivo-ON | 570   | 585  | THTmSSNTGmIPSSVR             | M4 Oxidation                | 100%               | 47.38              | 100.0%                  | 1720.79 | 861.90       | 2 |
| in vivo-ON | 570   | 585  | THTmSSNTGmIPSSVR             | M4 Oxidation                | 100%               | 32.67              | 100.0%                  | 1720.79 | 862.43       | 2 |
| in vivo-ON | 570   | 585  | THTmSSNTGmIPSSVR             | M4 Oxidation                | 100%               | 18.98              | 98.6%                   | 1720.79 | 575.40       | 3 |
| in vivo-ON | 570   | 585  | THTmSSNTGmIPSSVR             | M4 Oxidation, M10 Oxidation | 100%, 100%         | 1,000.00, 1,000.00 | 99.7%                   | 1736.78 | 580.60       | 3 |
| in vivo-ON | 570   | 585  | THTMSSNTGmIPSSVR             | M10 Oxidation               | 95%                | 9.97               | 96.2%                   | 1720.79 | 575.07       | 3 |
| in vivo-ON | 570   | 585  | THTMSSNTGmIPSSVR             | M10 Oxidation               | 100%               | 34.17              | 98.7%                   | 1720.79 | 575.06       | 3 |
| in vivo-ON | 570   | 585  | THTMSSNTGmIPSSVR             | M10 Oxidation               | 100%               | 23.62              | 99.4%                   | 1720.79 | 862.31       | 2 |
| in vivo-ON | 570   | 585  | THTMSSNTGmIPSSVR             |                             |                    |                    | 100.0%                  | 1704.79 | 569.53       | 3 |
| in vivo-ON | 570   | 585  | THTmSSNTGmIPSSVR             | M4 Oxidation                | 100%               | 40.04              | 100.0%                  | 1720.79 | 574.85       | 3 |
| in vivo-ON | 570   | 585  | THTmSSNTGmIPSSVR             | M4 Oxidation, M10 Oxidation | 100%, 100%         | 1,000.00, 1,000.00 | 100.0%                  | 1736.78 | 580.22       | 3 |
| in vivo-ON | 570   | 585  | THTmSSNTGmIPSSVR             | M4 Oxidation, M10 Oxidation | 100%, 100%         | 1,000.00, 1,000.00 | 83.3%                   | 1736.78 | 580.37       | 3 |
| in vivo-ON | 570   | 585  | THTmSSNTGmIPSSVR             | M4 Oxidation, M10 Oxidation | 100%, 100%         | 1,000.00, 1,000.00 | 100.0%                  | 1736.78 | 869.79       | 2 |
| in vivo-ON | 570   | 585  | THTmSSNTGmIPSSVR             | M4 Oxidation, M10 Oxidation | 100%, 100%         | 1,000.00, 1,000.00 | 100.0%                  | 1736.78 | 580.27       | 3 |
| in vivo-ON | 570   | 585  | THTmSSNTGmIPSSVR             | M4 Oxidation                | 100%               | 26.38              | 94.6%                   | 1720.79 | 574.59       | 3 |
| in vivo-ON | 570   | 585  | THTMSSNTGmIPSSVR             | M10 Oxidation               | 100%               | 45.99              | 60.5%                   | 1720.79 | 861.83       | 2 |
| in vivo-ON | 570   | 585  | THTMSSNTGmIPSSVR             |                             |                    |                    | 100.0%                  | 1704.79 | 569.54       | 3 |
| in vivo-ON | 570   | 585  | THTMSSNTGmIPSSVR             |                             |                    |                    | 99.6%                   | 1704.79 | 569.51       | 3 |
| in vivo-ON | 570   | 585  | THTmSSNTGmIPSSVR             | M4 Oxidation                | 99%                | 24.93              | 99.9%                   | 1720.79 | 574.98       | 3 |
| in vivo-ON | 570   | 585  | THTmSSNTGmIPSSVR             | M4 Oxidation                | 100%               | 21.94              | 95.1%                   | 1720.79 | 574.88       | 3 |
| in vivo-ON | 570   | 585  | THTMSSNTGmIPSSVR             |                             |                    |                    | 100.0%                  | 1704.79 | 569.66       | 3 |
| in vivo-ON | 570   | 585  | THTMSSNTGmIPSSVR             |                             |                    |                    | 67.2%                   | 1704.79 | 569.97       | 3 |
| in vivo-ON | 570   | 585  | THTMSSNTGmIPSSVR             |                             |                    |                    | 98.0%                   | 1704.79 | 853.74       | 2 |
| in vivo-ON | 570   | 585  | THTMSSNTGmIPSSVR             | M10 Oxidation               | 100%               | 56.47              | 65.6%                   | 1720.79 | 862.06       | 2 |
| in vivo-ON | 577   | 585  | TGmIPSSVR                    | M3 Oxidation                | 100%               | 1,000.00           | 99.7%                   | 962.49  | 482.21       | 2 |
| in vivo-ON | 603   | 629  | mEGQFLEIYNETIIDLLASGNNEEEKGK | M1 Oxidation                | 100%               | 1,000.00           | 100.0%                  | 3085.48 | 1029.88      | 3 |
| in vivo-ON | 603   | 627  | mEGQFLEIYNETIIDLLASGNNEEEK   | M1 Oxidation                | 100%               | 1,000.00           | 100.0%                  | 2900.36 | 1452.12      | 2 |
| in vivo-ON | 603   | 629  | mEGQFLEIYNETIIDLLASGNNEEEKGK | M1 Oxidation                | 100%               | 1,000.00           | 100.0%                  | 3085.48 | 1030.21      | 3 |
| in vivo-ON | 603   | 629  | mEGQFLEIYNETIIDLLASGNNEEEKGK | M1 Oxidation                | 100%               | 1,000.00           | 100.0%                  | 3085.48 | 1030.20      | 3 |
| in vivo-ON | 603   | 629  | mEGQFLEIYNETIIDLLASGNNEEEKGK | M1 Oxidation                | 100%               | 1,000.00           | 100.0%                  | 3085.48 | 1029.95      | 3 |
| in vivo-ON | 603   | 629  | MEGQFLEIYNETIIDLLASGNNEEEKGK |                             |                    |                    | 100.0%                  | 3069.49 | 1024.61      | 3 |
| in vivo-ON | 603   | 627  | mEGQFLEIYNETIIDLLASGNNEEEK   | M1 Oxidation                | 100%               | 1,000.00           | 100.0%                  | 2900.36 | 1451.88      | 2 |
| in vivo-ON | 603   | 627  | mEGQFLEIYNETIIDLLASGNNEEEK   | M1 Oxidation                | 100%               | 1,000.00           | 100.0%                  | 2900.36 | 1451.97      | 2 |
| in vivo-ON | 603   | 627  | mEGQFLEIYNETIIDLLASGNNEEEK   | M1 Oxidation                | 100%               | 1,000.00           | 100.0%                  | 2900.36 | 1452.16      | 2 |
| in vivo-ON | 603   | 627  | mEGQFLEIYNETIIDLLASGNNEEEK   | M1 Oxidation                | 100%               | 1,000.00           | 100.0%                  | 2900.36 | 1452.41      | 2 |
| in vivo-ON | 603   | 629  | mEGQFLEIYNETIIDLLASGNNEEEKGK | M1 Oxidation                | 100%               | 1,000.00           | 100.0%                  | 3085.48 | 1029.97      | 3 |
| in vivo-ON | 603   | 629  | mEGQFLEIYNETIIDLLASGNNEEEKGK | M1 Oxidation                | 100%               | 1,000.00           | 100.0%                  | 3085.48 | 1030.11      | 3 |
| in vivo-ON | 603   | 629  | mEGQFLEIYNETIIDLLASGNNEEEKGK | M1 Oxidation                | 100%               | 1,000.00           | 100.0%                  | 3085.48 | 1029.95      | 3 |
| in vivo-ON | 603   | 627  | mEGQFLEIYNETIIDLLASGNNEEEK   | M1 Oxidation                | 100%               | 1,000.00           | 100.0%                  | 2900.36 | 1452.25      | 2 |
| in vivo-ON | 603   | 629  | mEGQFLEIYNETIIDLLASGNNEEEKGK | M1 Oxidation                | 100%               | 1,000.00           | 100.0%                  | 3085.48 | 1030.01      | 3 |

Table S2

| Where      | Start | Stop | Peptide Sequence              | Variable Modifications | Localization Prob. | Ascore   | Scaffold: Peptide Prob. | Mass    | Observed m/z | z |
|------------|-------|------|-------------------------------|------------------------|--------------------|----------|-------------------------|---------|--------------|---|
| in vivo-ON | 603   | 627  | mEGQFLEIYNETIIDLLASGNEEEEK    | M1 Oxidation           | 100%               | 1,000.00 | 100.0%                  | 2900.36 | 1452.23      | 2 |
| in vivo-ON | 603   | 627  | mEGQFLEIYNETIIDLLASGNEEEEK    | M1 Oxidation           | 100%               | 1,000.00 | 100.0%                  | 2900.36 | 1451.92      | 2 |
| in vivo-ON | 603   | 627  | MEGQFLEIYNETIIDLLASGNEEEEK    |                        |                    |          | 100.0%                  | 2884.37 | 963.27       | 3 |
| in vivo-ON | 603   | 627  | mEGQFLEIYNETIIDLLASGNEEEEK    | M1 Oxidation           | 100%               | 1,000.00 | 100.0%                  | 2900.36 | 1452.04      | 2 |
| in vivo-ON | 603   | 627  | mEGQFLEIYNETIIDLLASGNEEEEK    | M1 Oxidation           | 100%               | 1,000.00 | 100.0%                  | 2900.36 | 968.44       | 3 |
| in vivo-ON | 603   | 629  | mEGQFLEIYNETIIDLLASGNEEEEK GK | M1 Oxidation           | 100%               | 1,000.00 | 100.0%                  | 3085.48 | 1030.11      | 3 |
| in vivo-ON | 603   | 629  | mEGQFLEIYNETIIDLLASGNEEEEK GK | M1 Oxidation           | 100%               | 1,000.00 | 100.0%                  | 3085.48 | 1030.00      | 3 |
| in vivo-ON | 603   | 629  | MEGQFLEIYNETIIDLLASGNEEEEK GK |                        |                    |          | 96.1%                   | 3069.49 | 1024.35      | 3 |
| in vivo-ON | 603   | 627  | MEGQFLEIYNETIIDLLASGNEEEEK    |                        |                    |          | 100.0%                  | 2884.37 | 1442.64      | 2 |
| in vivo-ON | 603   | 629  | mEGQFLEIYNETIIDLLASGNEEEEK GK | M1 Oxidation           | 100%               | 1,000.00 | 100.0%                  | 3085.48 | 1030.29      | 3 |
| in vivo-ON | 603   | 627  | mEGQFLEIYNETIIDLLASGNEEEEK    | M1 Oxidation           | 100%               | 1,000.00 | 100.0%                  | 2900.36 | 1451.29      | 2 |
| in vivo-ON | 603   | 629  | mEGQFLEIYNETIIDLLASGNEEEEK GK | M1 Oxidation           | 100%               | 1,000.00 | 87.4%                   | 3085.48 | 1029.93      | 3 |
| in vivo-ON | 603   | 629  | mEGQFLEIYNETIIDLLASGNEEEEK GK | M1 Oxidation           | 100%               | 1,000.00 | 99.9%                   | 3085.48 | 1030.30      | 3 |
| in vivo-ON | 603   | 627  | mEGQFLEIYNETIIDLLASGNEEEEK    | M1 Oxidation           | 100%               | 1,000.00 | 100.0%                  | 2900.36 | 968.36       | 3 |
| in vivo-ON | 603   | 629  | MEGQFLEIYNETIIDLLASGNEEEEK GK |                        |                    |          | 98.2%                   | 3069.49 | 1024.02      | 3 |
| in vivo-ON | 603   | 627  | mEGQFLEIYNETIIDLLASGNEEEEK    | M1 Oxidation           | 100%               | 1,000.00 | 100.0%                  | 2900.36 | 1451.46      | 2 |
| in vivo-ON | 603   | 627  | MEGQFLEIYNETIIDLLASGNEEEEK    |                        |                    |          | 100.0%                  | 2884.37 | 963.27       | 3 |
| in vivo-ON | 603   | 627  | mEGQFLEIYNETIIDLLASGNEEEEK    | M1 Oxidation           | 100%               | 1,000.00 | 100.0%                  | 2900.36 | 1452.19      | 2 |
| in vivo-ON | 603   | 627  | mEGQFLEIYNETIIDLLASGNEEEEK    | M1 Oxidation           | 100%               | 1,000.00 | 100.0%                  | 2900.36 | 1452.23      | 2 |
| in vivo-ON | 603   | 627  | mEGQFLEIYNETIIDLLASGNEEEEK    | M1 Oxidation           | 100%               | 1,000.00 | 100.0%                  | 2900.36 | 1452.24      | 2 |
| in vivo-ON | 603   | 629  | mEGQFLEIYNETIIDLLASGNEEEEK GK | M1 Oxidation           | 100%               | 1,000.00 | 99.8%                   | 3085.48 | 1030.28      | 3 |
| in vivo-ON | 603   | 627  | mEGQFLEIYNETIIDLLASGNEEEEK    | M1 Oxidation           | 100%               | 1,000.00 | 100.0%                  | 2900.36 | 968.60       | 3 |
| in vivo-ON | 603   | 629  | mEGQFLEIYNETIIDLLASGNEEEEK GK | M1 Oxidation           | 100%               | 1,000.00 | 100.0%                  | 3085.48 | 1029.53      | 3 |
| in vivo-ON | 603   | 627  | mEGQFLEIYNETIIDLLASGNEEEEK    | M1 Oxidation           | 100%               | 1,000.00 | 100.0%                  | 2900.36 | 1451.79      | 2 |
| in vivo-ON | 603   | 627  | mEGQFLEIYNETIIDLLASGNEEEEK    | M1 Oxidation           | 100%               | 1,000.00 | 100.0%                  | 2900.36 | 1451.67      | 2 |
| in vivo-ON | 603   | 629  | mEGQFLEIYNETIIDLLASGNEEEEK GK | M1 Oxidation           | 100%               | 1,000.00 | 100.0%                  | 3085.48 | 1544.67      | 2 |
| in vivo-ON | 603   | 627  | mEGQFLEIYNETIIDLLASGNEEEEK    | M1 Oxidation           | 100%               | 1,000.00 | 100.0%                  | 2900.36 | 1451.76      | 2 |
| in vivo-ON | 630   | 639  | KKLEIYHDTK                    |                        |                    |          | 100.0%                  | 1273.70 | 638.31       | 2 |
| in vivo-ON | 630   | 639  | KKLEIYHDTK                    |                        |                    |          | 100.0%                  | 1273.70 | 638.19       | 2 |
| in vivo-ON | 630   | 639  | KKLEIYHDTK                    |                        |                    |          | 100.0%                  | 1273.70 | 637.99       | 2 |
| in vivo-ON | 630   | 639  | KKLEIYHDTK                    |                        |                    |          | 100.0%                  | 1273.70 | 638.22       | 2 |
| in vivo-ON | 630   | 639  | KKLEIYHDTK                    |                        |                    |          | 100.0%                  | 1273.70 | 638.25       | 2 |
| in vivo-ON | 630   | 639  | KKLEIYHDTK                    |                        |                    |          | 100.0%                  | 1273.70 | 638.10       | 2 |
| in vivo-ON | 630   | 639  | KKLEIYHDTK                    |                        |                    |          | 100.0%                  | 1273.70 | 638.18       | 2 |
| in vivo-ON | 630   | 639  | KKLEIYHDTK                    |                        |                    |          | 100.0%                  | 1273.70 | 638.06       | 2 |
| in vivo-ON | 630   | 639  | KKLEIYHDTK                    |                        |                    |          | 88.3%                   | 1273.70 | 638.56       | 2 |
| in vivo-ON | 630   | 639  | KKLEIYHDTK                    |                        |                    |          | 99.9%                   | 1273.70 | 637.80       | 2 |
| in vivo-ON | 630   | 639  | KKLEIYHDTK                    |                        |                    |          | 100.0%                  | 1273.70 | 637.83       | 2 |
| in vivo-ON | 630   | 639  | KKLEIYHDTK                    |                        |                    |          | 100.0%                  | 1273.70 | 638.64       | 2 |
| in vivo-ON | 630   | 639  | KKLEIYHDTK                    |                        |                    |          | 100.0%                  | 1273.70 | 638.48       | 2 |
| in vivo-ON | 630   | 639  | KKLEIYHDTK                    |                        |                    |          | 75.1%                   | 1273.70 | 638.15       | 2 |
| in vivo-ON | 630   | 639  | KKLEIYHDTK                    |                        |                    |          | 100.0%                  | 1273.70 | 638.15       | 2 |
| in vivo-ON | 630   | 639  | KKLEIYHDTK                    |                        |                    |          | 100.0%                  | 1273.70 | 638.27       | 2 |
| in vivo-ON | 630   | 639  | KKLEIYHDTK                    |                        |                    |          | 100.0%                  | 1273.70 | 638.24       | 2 |
| in vivo-ON | 630   | 639  | KKLEIYHDTK                    |                        |                    |          | 99.7%                   | 1273.70 | 638.79       | 2 |
| in vivo-ON | 630   | 639  | KKLEIYHDTK                    |                        |                    |          | 100.0%                  | 1273.70 | 638.07       | 2 |
| in vivo-ON | 630   | 639  | KKLEIYHDTK                    |                        |                    |          | 86.0%                   | 1273.70 | 638.34       | 2 |
| in vivo-ON | 630   | 639  | KKLEIYHDTK                    |                        |                    |          | 99.8%                   | 1273.70 | 637.79       | 2 |
| in vivo-ON | 630   | 639  | KKLEIYHDTK                    |                        |                    |          | 99.4%                   | 1273.70 | 638.04       | 2 |
| in vivo-ON | 630   | 639  | KKLEIYHDTK                    |                        |                    |          | 99.8%                   | 1273.70 | 638.45       | 2 |
| in vivo-ON | 630   | 639  | KKLEIYHDTK                    |                        |                    |          | 99.9%                   | 1273.70 | 638.71       | 2 |
| in vivo-ON | 630   | 639  | KKLEIYHDTK                    |                        |                    |          | 93.1%                   | 1273.70 | 638.11       | 2 |
| in vivo-ON | 630   | 639  | KKLEIYHDTK                    |                        |                    |          | 97.3%                   | 1273.70 | 638.05       | 2 |
| in vivo-ON | 630   | 639  | KKLEIYHDTK                    |                        |                    |          | 99.5%                   | 1273.70 | 637.96       | 2 |
| in vivo-ON | 630   | 639  | KKLEIYHDTK                    |                        |                    |          | 58.3%                   | 1273.70 | 637.79       | 2 |
| in vivo-ON | 630   | 639  | KKLEIYHDTK                    |                        |                    |          | 77.8%                   | 1273.70 | 637.74       | 2 |
| in vivo-ON | 630   | 639  | KKLEIYHDTK                    |                        |                    |          | 99.7%                   | 1273.70 | 637.62       | 2 |
| in vivo-ON | 631   | 639  | KLEIYHDTK                     |                        |                    |          | 100.0%                  | 1145.61 | 573.81       | 2 |

| Where      | Start | Stop | Peptide Sequence           | Variable Modifications | Localization Prob. | Ascore | Scaffold: Peptide Prob. | Mass    | Observed m/z | Z |
|------------|-------|------|----------------------------|------------------------|--------------------|--------|-------------------------|---------|--------------|---|
| in vivo-ON | 631   | 639  | KLEIYHDTK                  |                        |                    |        | 100.0%                  | 1145.61 | 573.79       | 2 |
| in vivo-ON | 631   | 639  | KLEIYHDTK                  |                        |                    |        | 100.0%                  | 1145.61 | 574.61       | 2 |
| in vivo-ON | 631   | 639  | KLEIYHDTK                  |                        |                    |        | 94.2%                   | 1145.61 | 574.16       | 2 |
| in vivo-ON | 631   | 639  | KLEIYHDTK                  |                        |                    |        | 100.0%                  | 1145.61 | 574.62       | 2 |
| in vivo-ON | 631   | 639  | KLEIYHDTK                  |                        |                    |        | 100.0%                  | 1145.61 | 574.15       | 2 |
| in vivo-ON | 631   | 639  | KLEIYHDTK                  |                        |                    |        | 100.0%                  | 1145.61 | 574.04       | 2 |
| in vivo-ON | 631   | 639  | KLEIYHDTK                  |                        |                    |        | 100.0%                  | 1145.61 | 574.00       | 2 |
| in vivo-ON | 631   | 639  | KLEIYHDTK                  |                        |                    |        | 100.0%                  | 1145.61 | 574.18       | 2 |
| in vivo-ON | 631   | 639  | KLEIYHDTK                  |                        |                    |        | 100.0%                  | 1145.61 | 574.16       | 2 |
| in vivo-ON | 631   | 639  | KLEIYHDTK                  |                        |                    |        | 100.0%                  | 1145.61 | 574.12       | 2 |
| in vivo-ON | 631   | 639  | KLEIYHDTK                  |                        |                    |        | 100.0%                  | 1145.61 | 574.28       | 2 |
| in vivo-ON | 631   | 639  | KLEIYHDTK                  |                        |                    |        | 100.0%                  | 1145.61 | 573.99       | 2 |
| in vivo-ON | 631   | 639  | KLEIYHDTK                  |                        |                    |        | 100.0%                  | 1145.61 | 574.15       | 2 |
| in vivo-ON | 631   | 639  | KLEIYHDTK                  |                        |                    |        | 100.0%                  | 1145.61 | 574.13       | 2 |
| in vivo-ON | 631   | 639  | KLEIYHDTK                  |                        |                    |        | 100.0%                  | 1145.61 | 574.63       | 2 |
| in vivo-ON | 631   | 639  | KLEIYHDTK                  |                        |                    |        | 100.0%                  | 1145.61 | 574.12       | 2 |
| in vivo-ON | 631   | 639  | KLEIYHDTK                  |                        |                    |        | 100.0%                  | 1145.61 | 574.19       | 2 |
| in vivo-ON | 631   | 639  | KLEIYHDTK                  |                        |                    |        | 100.0%                  | 1145.61 | 1146.72      | 1 |
| in vivo-ON | 631   | 639  | KLEIYHDTK                  |                        |                    |        | 99.6%                   | 1145.61 | 574.90       | 2 |
| in vivo-ON | 631   | 639  | KLEIYHDTK                  |                        |                    |        | 100.0%                  | 1145.61 | 574.32       | 2 |
| in vivo-ON | 631   | 639  | KLEIYHDTK                  |                        |                    |        | 100.0%                  | 1145.61 | 574.23       | 2 |
| in vivo-ON | 631   | 639  | KLEIYHDTK                  |                        |                    |        | 100.0%                  | 1145.61 | 1146.76      | 1 |
| in vivo-ON | 631   | 639  | KLEIYHDTK                  |                        |                    |        | 97.3%                   | 1145.61 | 574.25       | 2 |
| in vivo-ON | 631   | 639  | KLEIYHDTK                  |                        |                    |        | 99.1%                   | 1145.61 | 574.58       | 2 |
| in vivo-ON | 631   | 639  | KLEIYHDTK                  |                        |                    |        | 72.0%                   | 1145.61 | 574.11       | 2 |
| in vivo-ON | 631   | 639  | KLEIYHDTK                  |                        |                    |        | 100.0%                  | 1145.61 | 574.04       | 2 |
| in vivo-ON | 631   | 639  | KLEIYHDTK                  |                        |                    |        | 100.0%                  | 1145.61 | 574.22       | 2 |
| in vivo-ON | 631   | 639  | KLEIYHDTK                  |                        |                    |        | 98.7%                   | 1145.61 | 574.30       | 2 |
| in vivo-ON | 631   | 639  | KLEIYHDTK                  |                        |                    |        | 98.6%                   | 1145.61 | 573.55       | 2 |
| in vivo-ON | 632   | 639  | LEIYHDTK                   |                        |                    |        | 100.0%                  | 1017.51 | 510.05       | 2 |
| in vivo-ON | 643   | 668  | TTITNITSEPLDTPEQVTWLLDQASK |                        |                    |        | 100.0%                  | 2900.47 | 968.42       | 3 |
| in vivo-ON | 643   | 668  | TTITNITSEPLDTPEQVTWLLDQASK |                        |                    |        | 100.0%                  | 2900.47 | 968.40       | 3 |
| in vivo-ON | 643   | 668  | TTITNITSEPLDTPEQVTWLLDQASK |                        |                    |        | 100.0%                  | 2900.47 | 1451.64      | 2 |
| in vivo-ON | 643   | 668  | TTITNITSEPLDTPEQVTWLLDQASK |                        |                    |        | 100.0%                  | 2900.47 | 1451.41      | 2 |
| in vivo-ON | 643   | 668  | TTITNITSEPLDTPEQVTWLLDQASK |                        |                    |        | 100.0%                  | 2900.47 | 1451.38      | 2 |
| in vivo-ON | 643   | 668  | TTITNITSEPLDTPEQVTWLLDQASK |                        |                    |        | 100.0%                  | 2900.47 | 1451.07      | 2 |
| in vivo-ON | 643   | 668  | TTITNITSEPLDTPEQVTWLLDQASK |                        |                    |        | 100.0%                  | 2900.47 | 1452.19      | 2 |
| in vivo-ON | 643   | 668  | TTITNITSEPLDTPEQVTWLLDQASK |                        |                    |        | 100.0%                  | 2900.47 | 1452.07      | 2 |
| in vivo-ON | 643   | 668  | TTITNITSEPLDTPEQVTWLLDQASK |                        |                    |        | 100.0%                  | 2900.47 | 968.64       | 3 |
| in vivo-ON | 643   | 668  | TTITNITSEPLDTPEQVTWLLDQASK |                        |                    |        | 100.0%                  | 2900.47 | 1452.16      | 2 |
| in vivo-ON | 643   | 668  | TTITNITSEPLDTPEQVTWLLDQASK |                        |                    |        | 100.0%                  | 2900.47 | 1452.31      | 2 |
| in vivo-ON | 643   | 668  | TTITNITSEPLDTPEQVTWLLDQASK |                        |                    |        | 100.0%                  | 2900.47 | 1451.64      | 2 |
| in vivo-ON | 643   | 668  | TTITNITSEPLDTPEQVTWLLDQASK |                        |                    |        | 100.0%                  | 2900.47 | 1452.15      | 2 |
| in vivo-ON | 643   | 668  | TTITNITSEPLDTPEQVTWLLDQASK |                        |                    |        | 100.0%                  | 2900.47 | 1451.32      | 2 |
| in vivo-ON | 643   | 668  | TTITNITSEPLDTPEQVTWLLDQASK |                        |                    |        | 98.1%                   | 2900.47 | 968.49       | 3 |
| in vivo-ON | 643   | 668  | TTITNITSEPLDTPEQVTWLLDQASK |                        |                    |        | 100.0%                  | 2900.47 | 1451.71      | 2 |
| in vivo-ON | 643   | 668  | TTITNITSEPLDTPEQVTWLLDQASK |                        |                    |        | 100.0%                  | 2900.47 | 1452.25      | 2 |
| in vivo-ON | 643   | 668  | TTITNITSEPLDTPEQVTWLLDQASK |                        |                    |        | 100.0%                  | 2900.47 | 1451.64      | 2 |
| in vivo-ON | 643   | 668  | TTITNITSEPLDTPEQVTWLLDQASK |                        |                    |        | 100.0%                  | 2900.47 | 1451.00      | 2 |
| in vivo-ON | 662   | 669  | LLDQASKN                   |                        |                    |        | 99.9%                   | 887.47  | 444.81       | 2 |
| in vivo-ON | 669   | 683  | NRSVAAINANEHSSR            | T7 Phosphorylation     | 65%                | 7.49   | 100.0%                  | 1692.73 | 565.19       | 3 |
| in vivo-ON | 671   | 683  | SVAATNANEHSSR              |                        |                    |        | 100.0%                  | 1342.62 | 672.29       | 2 |
| in vivo-ON | 671   | 683  | SVAATNANEHSSR              |                        |                    |        | 100.0%                  | 1342.62 | 672.58       | 2 |
| in vivo-ON | 671   | 683  | SVAATNANEHSSR              |                        |                    |        | 100.0%                  | 1342.62 | 672.58       | 2 |
| in vivo-ON | 671   | 683  | SVAATNANEHSSR              |                        |                    |        | 100.0%                  | 1342.62 | 672.57       | 2 |
| in vivo-ON | 671   | 683  | SVAATNANEHSSR              |                        |                    |        | 100.0%                  | 1342.62 | 673.10       | 2 |
| in vivo-ON | 671   | 683  | SVAATNANEHSSR              |                        |                    |        | 100.0%                  | 1342.62 | 672.31       | 2 |
| in vivo-ON | 671   | 683  | SVAATNANEHSSR              |                        |                    |        | 100.0%                  | 1342.62 | 672.53       | 2 |

| Where      | Start | Stop | Peptide Sequence      | Variable Modifications                     | Localization Prob. | Ascore             | Scaffold: Peptide Prob. | Mass    | Observed m/z | z |
|------------|-------|------|-----------------------|--------------------------------------------|--------------------|--------------------|-------------------------|---------|--------------|---|
| in vivo-ON | 671   | 683  | SVAATNANEHSSR         |                                            |                    |                    | 100.0%                  | 1342.62 | 672.61       | 2 |
| in vivo-ON | 671   | 683  | SVAATNANEHSSR         |                                            |                    |                    | 100.0%                  | 1342.62 | 672.59       | 2 |
| in vivo-ON | 671   | 683  | SVAATNANEHSSR         |                                            |                    |                    | 100.0%                  | 1342.62 | 672.70       | 2 |
| in vivo-ON | 671   | 683  | SVAATNANEHSSR         |                                            |                    |                    | 100.0%                  | 1342.62 | 672.43       | 2 |
| in vivo-ON | 671   | 683  | SVAATNANEHSSR         |                                            |                    |                    | 100.0%                  | 1342.62 | 672.71       | 2 |
| in vivo-ON | 671   | 683  | SVAATNANEHSSR         |                                            |                    |                    | 100.0%                  | 1342.62 | 672.62       | 2 |
| in vivo-ON | 671   | 683  | SVAATNANEHSSR         |                                            |                    |                    | 100.0%                  | 1342.62 | 672.52       | 2 |
| in vivo-ON | 671   | 683  | SVAATNANEHSSR         |                                            |                    |                    | 100.0%                  | 1342.62 | 672.67       | 2 |
| in vivo-ON | 671   | 683  | SVAATNANEHSSR         |                                            |                    |                    | 100.0%                  | 1342.62 | 672.67       | 2 |
| in vivo-ON | 671   | 683  | SVAATNANEHSSR         |                                            |                    |                    | 100.0%                  | 1342.62 | 672.64       | 2 |
| in vivo-ON | 671   | 683  | SVAATNANEHSSR         |                                            |                    |                    | 100.0%                  | 1342.62 | 672.73       | 2 |
| in vivo-ON | 671   | 683  | SVAATNANEHSSR         |                                            |                    |                    | 100.0%                  | 1342.62 | 672.71       | 2 |
| in vivo-ON | 671   | 683  | SVAATNANEHSSR         |                                            |                    |                    | 100.0%                  | 1342.62 | 672.41       | 2 |
| in vivo-ON | 671   | 683  | sVAATNANEHSSR         | S1 Phosphorylation                         | 61%                | 2.83               | 95.3%                   | 1422.59 | 712.18       | 2 |
| in vivo-ON | 671   | 683  | SVAatNANEHSSR         | T5 Phosphorylation                         | 50%                | 0                  | 99.7%                   | 1422.59 | 712.12       | 2 |
| in vivo-ON | 671   | 683  | SVAATNANEHSSR         |                                            |                    |                    | 100.0%                  | 1342.62 | 1343.72      | 1 |
| in vivo-ON | 671   | 683  | SVAATNANEHSSR         |                                            |                    |                    | 100.0%                  | 1342.62 | 1343.77      | 1 |
| in vivo-ON | 671   | 683  | SVAATNANEHSSR         |                                            |                    |                    | 100.0%                  | 1342.62 | 1344.79      | 1 |
| in vivo-ON | 671   | 683  | SVAATNANEHSSR         |                                            |                    |                    | 100.0%                  | 1342.62 | 1343.79      | 1 |
| in vivo-ON | 671   | 683  | SVAATNANEHSSR         |                                            |                    |                    | 100.0%                  | 1342.62 | 1343.69      | 1 |
| in vivo-ON | 671   | 683  | SVAATNANEHSSR         |                                            |                    |                    | 54.7%                   | 1342.62 | 449.05       | 3 |
| in vivo-ON | 684   | 704  | SHSVFmLHLNGSNSTTGETcR | M6 Oxidation, C20 Iodoacetamide derivative | 100%, 100%         | 1,000.00, 1,000.00 | 99.7%                   | 2350.04 | 785.14       | 3 |
| in vivo-ON | 684   | 704  | SHSVFmLHLNGSNSTTGETcR | M6 Oxidation, C20 Iodoacetamide derivative | 100%, 100%         | 1,000.00, 1,000.00 | 100.0%                  | 2350.04 | 785.03       | 3 |
| in vivo-ON | 684   | 704  | SHSVFmLHLNGSNSTTGETcR | C20 Iodoacetamide derivative               | 100%               | 1,000.00           | 100.0%                  | 2334.05 | 779.83       | 3 |
| in vivo-ON | 684   | 704  | SHSVFmLHLNGSNSTTGETcR | M6 Oxidation, C20 Iodoacetamide derivative | 100%, 100%         | 1,000.00, 1,000.00 | 100.0%                  | 2350.04 | 784.98       | 3 |
| in vivo-ON | 684   | 704  | SHSVFmLHLNGSNSTTGETcR | M6 Oxidation, C20 Iodoacetamide derivative | 100%, 100%         | 1,000.00, 1,000.00 | 67.3%                   | 2350.04 | 785.10       | 3 |
| in vivo-ON | 684   | 704  | SHSVFmLHLNGSNSTTGETcR | C20 Iodoacetamide derivative               | 100%               | 1,000.00           | 100.0%                  | 2334.05 | 779.82       | 3 |
| in vivo-ON | 684   | 704  | SHSVFmLHLNGSNSTTGETcR | M6 Oxidation, C20 Iodoacetamide derivative | 100%, 100%         | 1,000.00, 1,000.00 | 100.0%                  | 2350.04 | 785.10       | 3 |
| in vivo-ON | 684   | 704  | SHSVFmLHLNGSNSTTGETcR | M6 Oxidation, C20 Iodoacetamide derivative | 100%, 100%         | 1,000.00, 1,000.00 | 100.0%                  | 2350.04 | 784.49       | 3 |
| in vivo-ON | 684   | 704  | SHSVFmLHLNGSNSTTGETcR | M6 Oxidation, C20 Iodoacetamide derivative | 100%, 100%         | 1,000.00, 1,000.00 | 100.0%                  | 2350.04 | 785.08       | 3 |
| in vivo-ON | 684   | 704  | SHSVFmLHLNGSNSTTGETcR | M6 Oxidation, C20 Iodoacetamide derivative | 100%, 100%         | 1,000.00, 1,000.00 | 100.0%                  | 2350.04 | 784.86       | 3 |
| in vivo-ON | 692   | 707  | LNGsNsITGETCRSTL      | S4 Phosphorylation, T7 Phosphorylation     | 46%, 63%           | 4.73, 7.32         | 57.9%                   | 1799.68 | 600.12       | 3 |
| in vivo-ON | 705   | 717  | STLNLIDLAGSER         |                                            |                    |                    | 100.0%                  | 1387.73 | 695.11       | 2 |
| in vivo-ON | 705   | 717  | STLNLIDLAGSER         |                                            |                    |                    | 100.0%                  | 1387.73 | 695.66       | 2 |
| in vivo-ON | 705   | 717  | STLNLIDLAGSER         |                                            |                    |                    | 100.0%                  | 1387.73 | 695.10       | 2 |
| in vivo-ON | 705   | 717  | STLNLIDLAGSER         |                                            |                    |                    | 100.0%                  | 1387.73 | 695.14       | 2 |
| in vivo-ON | 705   | 717  | STLNLIDLAGSER         |                                            |                    |                    | 100.0%                  | 1387.73 | 694.83       | 2 |
| in vivo-ON | 705   | 717  | STLNLIDLAGSER         |                                            |                    |                    | 100.0%                  | 1387.73 | 695.12       | 2 |
| in vivo-ON | 705   | 717  | STLNLIDLAGSER         |                                            |                    |                    | 100.0%                  | 1387.73 | 695.10       | 2 |
| in vivo-ON | 705   | 717  | STLNLIDLAGSER         |                                            |                    |                    | 100.0%                  | 1387.73 | 694.85       | 2 |
| in vivo-ON | 705   | 717  | STLNLIDLAGSER         |                                            |                    |                    | 100.0%                  | 1387.73 | 694.82       | 2 |
| in vivo-ON | 705   | 717  | STLNLIDLAGSER         |                                            |                    |                    | 100.0%                  | 1387.73 | 694.78       | 2 |
| in vivo-ON | 705   | 717  | STLNLIDLAGSER         |                                            |                    |                    | 100.0%                  | 1387.73 | 694.64       | 2 |
| in vivo-ON | 705   | 717  | STLNLIDLAGSER         |                                            |                    |                    | 100.0%                  | 1387.73 | 695.00       | 2 |
| in vivo-ON | 705   | 717  | STLNLIDLAGSER         |                                            |                    |                    | 100.0%                  | 1387.73 | 695.21       | 2 |
| in vivo-ON | 705   | 717  | STLNLIDLAGSER         |                                            |                    |                    | 100.0%                  | 1387.73 | 463.98       | 3 |
| in vivo-ON | 705   | 717  | STLNLIDLAGSER         |                                            |                    |                    | 100.0%                  | 1387.73 | 463.92       | 3 |
| in vivo-ON | 705   | 717  | STLNLIDLAGSER         |                                            |                    |                    | 75.5%                   | 1387.73 | 695.85       | 2 |
| in vivo-ON | 705   | 717  | STLNLIDLAGSER         |                                            |                    |                    | 100.0%                  | 1387.73 | 464.06       | 3 |
| in vivo-ON | 705   | 717  | STLNLIDLAGSER         |                                            |                    |                    | 100.0%                  | 1387.73 | 464.01       | 3 |
| in vivo-ON | 705   | 717  | STLNLIDLAGSER         |                                            |                    |                    | 100.0%                  | 1387.73 | 464.01       | 3 |
| in vivo-ON | 705   | 717  | STLNLIDLAGSER         |                                            |                    |                    | 100.0%                  | 1387.73 | 695.37       | 2 |
| in vivo-ON | 705   | 717  | STLNLIDLAGSER         |                                            |                    |                    | 100.0%                  | 1387.73 | 695.30       | 2 |
| in vivo-ON | 705   | 717  | STLNLIDLAGSER         |                                            |                    |                    | 100.0%                  | 1387.73 | 695.39       | 2 |
| in vivo-ON | 705   | 717  | STLNLIDLAGSER         |                                            |                    |                    | 100.0%                  | 1387.73 | 695.21       | 2 |
| in vivo-ON | 705   | 717  | STLNLIDLAGSER         |                                            |                    |                    | 100.0%                  | 1387.73 | 695.73       | 2 |
| in vivo-ON | 705   | 717  | STLNLIDLAGSER         |                                            |                    |                    | 100.0%                  | 1387.73 | 695.22       | 2 |

| Where      | Start | Stop | Peptide Sequence        | Variable Modifications | Localization Prob. | Ascore | Scaffold: Peptide Prob. | Mass    | Observed m/z | Z |
|------------|-------|------|-------------------------|------------------------|--------------------|--------|-------------------------|---------|--------------|---|
| in vivo-ON | 705   | 717  | STLNLIDLAGSER           |                        |                    |        | 100.0%                  | 1387.73 | 695.34       | 2 |
| in vivo-ON | 705   | 717  | STLNLIDLAGSER           |                        |                    |        | 100.0%                  | 1387.73 | 695.25       | 2 |
| in vivo-ON | 705   | 717  | STLNLIDLAGSER           |                        |                    |        | 100.0%                  | 1387.73 | 695.75       | 2 |
| in vivo-ON | 705   | 717  | STLNLIDLAGSER           |                        |                    |        | 100.0%                  | 1387.73 | 694.87       | 2 |
| in vivo-ON | 705   | 717  | STLNLIDLAGSER           |                        |                    |        | 100.0%                  | 1387.73 | 695.78       | 2 |
| in vivo-ON | 705   | 717  | STLNLIDLAGSER           |                        |                    |        | 100.0%                  | 1387.73 | 695.41       | 2 |
| in vivo-ON | 705   | 717  | STLNLIDLAGSER           |                        |                    |        | 100.0%                  | 1387.73 | 695.81       | 2 |
| in vivo-ON | 705   | 717  | STLNLIDLAGSER           |                        |                    |        | 100.0%                  | 1387.73 | 695.20       | 2 |
| in vivo-ON | 705   | 717  | STLNLIDLAGSER           |                        |                    |        | 100.0%                  | 1387.73 | 694.90       | 2 |
| in vivo-ON | 705   | 717  | STLNLIDLAGSER           |                        |                    |        | 100.0%                  | 1387.73 | 695.21       | 2 |
| in vivo-ON | 705   | 717  | STLNLIDLAGSER           |                        |                    |        | 100.0%                  | 1387.73 | 464.02       | 3 |
| in vivo-ON | 705   | 717  | STLNLIDLAGSER           |                        |                    |        | 100.0%                  | 1387.73 | 464.07       | 3 |
| in vivo-ON | 705   | 717  | STLNLIDLAGSER           |                        |                    |        | 87.9%                   | 1387.73 | 695.80       | 2 |
| in vivo-ON | 705   | 717  | STLNLIDLAGSER           |                        |                    |        | 84.4%                   | 1387.73 | 464.10       | 3 |
| in vivo-ON | 705   | 717  | STLNLIDLAGSER           |                        |                    |        | 100.0%                  | 1387.73 | 1389.88      | 1 |
| in vivo-ON | 705   | 717  | STLNLIDLAGSER           |                        |                    |        | 100.0%                  | 1387.73 | 1388.93      | 1 |
| in vivo-ON | 705   | 717  | STLNLIDLAGSER           |                        |                    |        | 100.0%                  | 1387.73 | 1389.89      | 1 |
| in vivo-ON | 705   | 717  | STLNLIDLAGSER           |                        |                    |        | 100.0%                  | 1387.73 | 1388.84      | 1 |
| in vivo-ON | 705   | 717  | STLNLIDLAGSER           |                        |                    |        | 100.0%                  | 1387.73 | 1388.98      | 1 |
| in vivo-ON | 708   | 718  | NLIDLAGSERL             |                        |                    |        | 99.8%                   | 1199.65 | 600.79       | 2 |
| in vivo-ON | 708   | 718  | NLIDLAGSERL             |                        |                    |        | 96.9%                   | 1199.65 | 600.72       | 2 |
| in vivo-ON | 708   | 718  | NLIDLAGSERL             |                        |                    |        | 62.4%                   | 1199.65 | 600.77       | 2 |
| in vivo-ON | 709   | 717  | LIDLAGSER               |                        |                    |        | 100.0%                  | 972.52  | 487.37       | 2 |
| in vivo-ON | 709   | 717  | LIDLAGSER               |                        |                    |        | 99.8%                   | 972.52  | 487.44       | 2 |
| in vivo-ON | 718   | 727  | LSSSQSVGER              |                        |                    |        | 100.0%                  | 1048.51 | 525.48       | 2 |
| in vivo-ON | 718   | 727  | LSSSQSVGER              |                        |                    |        | 100.0%                  | 1048.51 | 525.54       | 2 |
| in vivo-ON | 718   | 727  | LSSSQSVGER              |                        |                    |        | 100.0%                  | 1048.51 | 525.48       | 2 |
| in vivo-ON | 718   | 727  | LSSSQSVGER              |                        |                    |        | 100.0%                  | 1048.51 | 525.60       | 2 |
| in vivo-ON | 718   | 727  | LSSSQSVGER              |                        |                    |        | 100.0%                  | 1048.51 | 1049.41      | 1 |
| in vivo-ON | 718   | 727  | LSSSQSVGER              |                        |                    |        | 100.0%                  | 1048.51 | 525.56       | 2 |
| in vivo-ON | 718   | 727  | LSSSQSVGER              |                        |                    |        | 100.0%                  | 1048.51 | 525.58       | 2 |
| in vivo-ON | 718   | 727  | LSSSQSVGER              |                        |                    |        | 100.0%                  | 1048.51 | 525.58       | 2 |
| in vivo-ON | 718   | 727  | LSSSQSVGER              |                        |                    |        | 50.2%                   | 1048.51 | 525.63       | 2 |
| in vivo-ON | 718   | 727  | LSSSQSVGER              |                        |                    |        | 100.0%                  | 1048.51 | 1050.67      | 1 |
| in vivo-ON | 718   | 727  | LSSSQSVGER              |                        |                    |        | 100.0%                  | 1048.51 | 1049.58      | 1 |
| in vivo-ON | 718   | 727  | LSSSQSVGER              |                        |                    |        | 100.0%                  | 1048.51 | 1049.61      | 1 |
| in vivo-ON | 724   | 727  | VGER                    |                        |                    |        | 56.6%                   | 459.24  | 460.28       | 1 |
| in vivo-ON | 728   | 736  | LKETQAINK               |                        |                    |        | 99.9%                   | 1043.60 | 522.77       | 2 |
| in vivo-ON | 728   | 736  | LKETQAINK               |                        |                    |        | 99.9%                   | 1043.60 | 523.05       | 2 |
| in vivo-ON | 728   | 736  | LKETQAINK               |                        |                    |        | 96.3%                   | 1043.60 | 523.13       | 2 |
| in vivo-ON | 728   | 736  | LKETQAINK               |                        |                    |        | 98.0%                   | 1043.60 | 523.14       | 2 |
| in vivo-ON | 728   | 736  | LKETQAINK               |                        |                    |        | 100.0%                  | 1043.60 | 522.83       | 2 |
| in vivo-ON | 728   | 736  | LKETQAINK               |                        |                    |        | 99.8%                   | 1043.60 | 522.87       | 2 |
| in vivo-ON | 728   | 736  | LKETQAINK               |                        |                    |        | 84.0%                   | 1043.60 | 522.79       | 2 |
| in vivo-ON | 728   | 736  | LKETQAINK               |                        |                    |        | 99.4%                   | 1043.60 | 523.15       | 2 |
| in vivo-ON | 728   | 736  | LKETQAINK               |                        |                    |        | 99.9%                   | 1043.60 | 523.18       | 2 |
| in vivo-ON | 728   | 736  | LKETQAINK               |                        |                    |        | 100.0%                  | 1043.60 | 523.08       | 2 |
| in vivo-ON | 728   | 736  | LKETQAINK               |                        |                    |        | 100.0%                  | 1043.60 | 522.88       | 2 |
| in vivo-ON | 728   | 736  | LKETQAINK               |                        |                    |        | 94.0%                   | 1043.60 | 522.83       | 2 |
| in vivo-ON | 728   | 736  | LKETQAINK               |                        |                    |        | 87.5%                   | 1043.60 | 523.09       | 2 |
| in vivo-ON | 728   | 736  | LKETQAINK               |                        |                    |        | 68.5%                   | 1043.60 | 522.39       | 2 |
| in vivo-ON | 728   | 736  | LKETQAINK               |                        |                    |        | 99.0%                   | 1043.60 | 1045.73      | 1 |
| in vivo-ON | 728   | 736  | LKETQAINK               |                        |                    |        | 99.7%                   | 1043.60 | 1044.69      | 1 |
| in vivo-ON | 728   | 736  | LKETQAINK               |                        |                    |        | 98.2%                   | 1043.60 | 1044.70      | 1 |
| in vivo-ON | 730   | 752  | ETQAINKsLSCLGDVIHALGSGK | S8 Phosphorylation     | 64%                | 5.55   | 97.9%                   | 2420.18 | 808.24       | 3 |
| in vivo-ON | 730   | 752  | ETQAINKsLSCLGDVIHALGSGK | S8 Phosphorylation     | 98%                | 16.76  | 99.7%                   | 2420.18 | 808.13       | 3 |
| in vivo-ON | 730   | 752  | ETQAINKsLSCLGDVIHALGSGK | S8 Phosphorylation     | 97%                | 16.51  | 51.5%                   | 2420.18 | 808.26       | 3 |
| in vivo-ON | 730   | 752  | ETQAINKsLSCLGDVIHALGSGK | S8 Phosphorylation     | 100%               | 26.57  | 99.8%                   | 2420.18 | 808.35       | 3 |

| Where      | Start | Stop | Peptide Sequence        | Variable Modifications                          | Localization Prob. | Ascore           | Scaffold: Peptide Prob. | Mass    | Observed m/z | Z |
|------------|-------|------|-------------------------|-------------------------------------------------|--------------------|------------------|-------------------------|---------|--------------|---|
| in vivo-ON | 730   | 752  | ETQAINKsLSCLGDVIHALGSGK | S8 Phosphorylation                              | 66%                | 4.73             | 62.2%                   | 2420.18 | 807.95       | 3 |
| in vivo-ON | 730   | 752  | ETQAINKsLSCLGDVIHALGSGK | S8 Phosphorylation                              | 84%                | 8.26             | 98.3%                   | 2420.18 | 808.14       | 3 |
| in vivo-ON | 730   | 752  | ETQAINKsLSCLGDVIHALGSGK | S8 Phosphorylation                              | 60%                | 3.56             | 80.5%                   | 2420.18 | 807.49       | 3 |
| in vivo-ON | 730   | 752  | ETQAINKsLSCLGDVIHALGSGK | S8 Phosphorylation                              | 85%                | 8.26             | 84.7%                   | 2420.18 | 807.83       | 3 |
| in vivo-ON | 730   | 752  | ETQAINKsLSCLGDVIHALGSGK | S8 Phosphorylation                              | 89%                | 9.85             | 100.0%                  | 2420.18 | 807.85       | 3 |
| in vivo-ON | 730   | 752  | ETQAINKsLSCLGDVIHALGSGK | S8 Phosphorylation                              | 99%                | 20.17            | 59.3%                   | 2420.18 | 808.44       | 3 |
| in vivo-ON | 730   | 752  | ETQAINKsLSCLGDVIHALGSGK | S8 Phosphorylation                              | 100%               | 24.67            | 63.6%                   | 2420.18 | 807.81       | 3 |
| in vivo-ON | 730   | 752  | ETQAINKsLSCLGDVIHALGSGK | S8 Phosphorylation                              | 84%                | 8.26             | 91.4%                   | 2420.18 | 807.73       | 3 |
| in vivo-ON | 730   | 752  | ETQAINKsLSCLGDVIHALGSGK | S8 Phosphorylation                              | 78%                | 8.26             | 99.2%                   | 2420.18 | 807.79       | 3 |
| in vivo-ON | 730   | 752  | ETQAINKsLSCLGDVIHALGSGK | S8 Phosphorylation                              | 65%                | 4.08             | 65.7%                   | 2420.18 | 807.18       | 3 |
| in vivo-ON | 737   | 752  | LSCLGDVIHALGSGK         | C4 Iodoacetamide derivative                     | 100%               | 1,000.00         | 100.0%                  | 1612.82 | 807.73       | 2 |
| in vivo-ON | 737   | 752  | LSCLGDVIHALGSGK         | C4 Iodoacetamide derivative                     | 100%               | 1,000.00         | 100.0%                  | 1612.82 | 807.81       | 2 |
| in vivo-ON | 737   | 752  | LSCLGDVIHALGSGK         | C4 Iodoacetamide derivative                     | 100%               | 1,000.00         | 100.0%                  | 1612.82 | 808.14       | 2 |
| in vivo-ON | 737   | 752  | LSCLGDVIHALGSGK         | C4 Iodoacetamide derivative                     | 100%               | 1,000.00         | 100.0%                  | 1612.82 | 808.26       | 2 |
| in vivo-ON | 737   | 752  | LSCLGDVIHALGSGK         | C4 Iodoacetamide derivative                     | 100%               | 1,000.00         | 100.0%                  | 1612.82 | 807.83       | 2 |
| in vivo-ON | 737   | 752  | LSCLGDVIHALGSGK         | C4 Iodoacetamide derivative                     | 100%               | 1,000.00         | 100.0%                  | 1612.82 | 808.13       | 2 |
| in vivo-ON | 737   | 752  | LSCLGDVIHALGSGK         | C4 Iodoacetamide derivative                     | 100%               | 1,000.00         | 100.0%                  | 1612.82 | 807.85       | 2 |
| in vivo-ON | 737   | 752  | LSCLGDVIHALGSGK         | C4 Iodoacetamide derivative                     | 100%               | 1,000.00         | 100.0%                  | 1612.82 | 807.82       | 2 |
| in vivo-ON | 737   | 752  | LSCLGDVIHALGSGK         | C4 Iodoacetamide derivative                     | 100%               | 1,000.00         | 100.0%                  | 1612.82 | 807.95       | 2 |
| in vivo-ON | 737   | 752  | LSCLGDVIHALGSGK         | C4 Iodoacetamide derivative                     | 100%               | 1,000.00         | 100.0%                  | 1612.82 | 807.18       | 2 |
| in vivo-ON | 737   | 752  | LSCLGDVIHALGSGK         | C4 Iodoacetamide derivative                     | 100%               | 1,000.00         | 100.0%                  | 1612.82 | 807.07       | 2 |
| in vivo-ON | 737   | 752  | LSCLGDVIHALGSGK         | C4 Iodoacetamide derivative                     | 100%               | 1,000.00         | 100.0%                  | 1612.82 | 807.52       | 2 |
| in vivo-ON | 737   | 752  | LSCLGDVIHALGSGK         | C4 Iodoacetamide derivative                     | 100%               | 1,000.00         | 100.0%                  | 1612.82 | 539.24       | 3 |
| in vivo-ON | 737   | 752  | LSCLGDVIHALGSGK         | S3 Phosphorylation                              | 87%                | 8.46             | 100.0%                  | 1635.77 | 819.37       | 2 |
| in vivo-ON | 737   | 752  | LSCLGDVIHALGSGK         | C4 Iodoacetamide derivative                     | 100%               | 1,000.00         | 100.0%                  | 1612.82 | 539.05       | 3 |
| in vivo-ON | 737   | 752  | LSCLGDVIHALGSGK         | C4 Iodoacetamide derivative                     | 100%               | 1,000.00         | 100.0%                  | 1612.82 | 539.19       | 3 |
| in vivo-ON | 737   | 752  | LSCLGDVIHALGSGK         | C4 Iodoacetamide derivative                     | 100%               | 1,000.00         | 100.0%                  | 1612.82 | 538.88       | 3 |
| in vivo-ON | 737   | 752  | LSCLGDVIHALGSGK         | C4 Iodoacetamide derivative                     | 100%               | 1,000.00         | 100.0%                  | 1612.82 | 539.19       | 3 |
| in vivo-ON | 737   | 752  | LSCLGDVIHALGSGK         | C4 Iodoacetamide derivative                     | 100%               | 1,000.00         | 100.0%                  | 1612.82 | 539.19       | 3 |
| in vivo-ON | 737   | 752  | LSCLGDVIHALGSGK         | C4 Iodoacetamide derivative                     | 100%               | 1,000.00         | 100.0%                  | 1612.82 | 539.05       | 3 |
| in vivo-ON | 737   | 752  | LSCLGDVIHALGSGK         | C4 Iodoacetamide derivative                     | 100%               | 1,000.00         | 100.0%                  | 1612.82 | 539.08       | 3 |
| in vivo-ON | 737   | 752  | LSCLGDVIHALGSGK         | C4 Iodoacetamide derivative                     | 100%               | 1,000.00         | 100.0%                  | 1612.82 | 539.06       | 3 |
| in vivo-ON | 737   | 752  | LSCLGDVIHALGSGK         | C4 Iodoacetamide derivative                     | 100%               | 1,000.00         | 100.0%                  | 1612.82 | 539.11       | 3 |
| in vivo-ON | 737   | 752  | LSCLGDVIHALGSGK         | S3 Phosphorylation                              | 90%                | 9.38             | 100.0%                  | 1635.77 | 818.88       | 2 |
| in vivo-ON | 737   | 752  | LSCLGDVIHALGSGK         | C4 Iodoacetamide derivative                     | 100%               | 1,000.00         | 100.0%                  | 1612.82 | 539.08       | 3 |
| in vivo-ON | 737   | 752  | LSCLGDVIHALGSGK         | S3 Phosphorylation                              | 72%                | 7.21             | 100.0%                  | 1635.77 | 819.31       | 2 |
| in vivo-ON | 737   | 752  | LSCLGDVIHALGSGK         | C4 Iodoacetamide derivative                     | 100%               | 1,000.00         | 100.0%                  | 1612.82 | 539.11       | 3 |
| in vivo-ON | 737   | 752  | LSCLGDVIHALGSGK         | C4 Iodoacetamide derivative                     | 100%               | 1,000.00         | 100.0%                  | 1612.82 | 539.19       | 3 |
| in vivo-ON | 737   | 752  | LSCLGDVIHALGSGK         | C4 Iodoacetamide derivative                     | 100%               | 1,000.00         | 100.0%                  | 1612.82 | 539.06       | 3 |
| in vivo-ON | 737   | 752  | LSCLGDVIHALGSGK         | C4 Iodoacetamide derivative                     | 100%               | 1,000.00         | 100.0%                  | 1612.82 | 538.82       | 3 |
| in vivo-ON | 737   | 752  | LSCLGDVIHALGSGK         | S3 Phosphorylation                              | 83%                | 7.09             | 100.0%                  | 1635.77 | 818.78       | 2 |
| in vivo-ON | 737   | 752  | LSCLGDVIHALGSGK         | C4 Iodoacetamide derivative                     | 100%               | 1,000.00         | 99.7%                   | 1612.82 | 539.18       | 3 |
| in vivo-ON | 737   | 752  | LSCLGDVIHALGSGK         | C4 Iodoacetamide derivative                     | 100%               | 1,000.00         | 100.0%                  | 1612.82 | 539.28       | 3 |
| in vivo-ON | 737   | 752  | LSCLGDVIHALGSGK         | C4 Iodoacetamide derivative                     | 100%               | 1,000.00         | 99.7%                   | 1612.82 | 539.05       | 3 |
| in vivo-ON | 737   | 752  | LSCLGDVIHALGSGK         | S3 Phosphorylation                              | 45%                | 0                | 99.7%                   | 1635.77 | 819.17       | 2 |
| in vivo-ON | 737   | 752  | LSCLGDVIHALGSGK         | S3 Phosphorylation                              | 67%                | 6.08             | 97.8%                   | 1635.77 | 818.83       | 2 |
| in vivo-ON | 737   | 752  | LSCLGDVIHALGSGK         | C4 Iodoacetamide derivative                     | 100%               | 1,000.00         | 98.8%                   | 1612.82 | 539.18       | 3 |
| in vivo-ON | 737   | 752  | LSCLGDVIHALGSGK         | C4 Iodoacetamide derivative                     | 100%               | 1,000.00         | 92.9%                   | 1612.82 | 539.34       | 3 |
| in vivo-ON | 737   | 752  | LSCLGDVIHALGSGK         | C4 Iodoacetamide derivative                     | 100%               | 1,000.00         | 100.0%                  | 1612.82 | 538.97       | 3 |
| in vivo-ON | 737   | 752  | LSCLGDVIHALGSGK         | C4 Iodoacetamide derivative                     | 100%               | 1,000.00         | 100.0%                  | 1612.82 | 538.88       | 3 |
| in vivo-ON | 737   | 752  | LSCLGDVIHALGSGK         | C4 Iodoacetamide derivative                     | 100%               | 1,000.00         | 97.8%                   | 1612.82 | 539.15       | 3 |
| in vivo-ON | 737   | 752  | LSCLGDVIHALGSGK         | C4 Iodoacetamide derivative                     | 100%               | 1,000.00         | 97.3%                   | 1612.82 | 539.44       | 3 |
| in vivo-ON | 738   | 752  | LsclGDVIHALGSGK         | S2 Phosphorylation, C3 Iodoacetamide derivative | 100%, 100%         | 104.11, 1,000.00 | 94.0%                   | 1605.76 | 803.15       | 2 |
| in vivo-ON | 738   | 752  | LsclGDVIHALGSGK         | S2 Phosphorylation, C3 Iodoacetamide derivative | 100%, 100%         | 81.96, 1,000.00  | 86.8%                   | 1605.76 | 803.13       | 2 |
| in vivo-ON | 738   | 752  | LsclGDVIHALGSGK         | S2 Phosphorylation, C3 Iodoacetamide derivative | 100%, 100%         | 113.39, 1,000.00 | 91.4%                   | 1605.76 | 803.15       | 2 |
| in vivo-ON | 738   | 752  | LsclGDVIHALGSGK         | S2 Phosphorylation, C3 Iodoacetamide derivative | 100%, 100%         | 100.22, 1,000.00 | 91.6%                   | 1605.76 | 803.60       | 2 |
| in vivo-ON | 738   | 752  | LsclGDVIHALGSGK         | S2 Phosphorylation, C3 Iodoacetamide derivative | 100%, 100%         | 100.07, 1,000.00 | 67.2%                   | 1605.76 | 803.01       | 2 |
| in vivo-ON | 738   | 752  | LsclGDVIHALGSGK         | S2 Phosphorylation, C3 Iodoacetamide derivative | 100%, 100%         | 96.96, 1,000.00  | 86.4%                   | 1605.76 | 803.13       | 2 |

Table S2

| Where      | Start | Stop | Peptide Sequence  | Variable Modifications                          | Localization Prob. | Ascore          | Scaffold: Peptide Prob. | Mass    | Observed m/z | Z |
|------------|-------|------|-------------------|-------------------------------------------------|--------------------|-----------------|-------------------------|---------|--------------|---|
| in vivo-ON | 738   | 752  | LscLGDVIHALGSGK   | S2 Phosphorylation, C3 Iodoacetamide derivative | 100%, 100%         | 96.96, 1,000.00 | 92.6%                   | 1605.76 | 803.18       | 2 |
| in vivo-ON | 738   | 752  | LscLGDVIHALGSGK   | S2 Phosphorylation, C3 Iodoacetamide derivative | 100%, 100%         | 90.99, 1,000.00 | 95.2%                   | 1605.76 | 803.15       | 2 |
| in vivo-ON | 738   | 752  | LscLGDVIHALGSGK   | S2 Phosphorylation, C3 Iodoacetamide derivative | 100%, 100%         | 78.62, 1,000.00 | 97.0%                   | 1605.76 | 803.19       | 2 |
| in vivo-ON | 753   | 760  | EGTYIPYR          |                                                 |                    |                 | 83.9%                   | 997.49  | 499.97       | 2 |
| in vivo-ON | 753   | 760  | EGTYIPYR          |                                                 |                    |                 | 89.9%                   | 997.49  | 499.99       | 2 |
| in vivo-ON | 753   | 760  | EGTYIPYR          |                                                 |                    |                 | 84.0%                   | 997.49  | 500.01       | 2 |
| in vivo-ON | 753   | 760  | EGTYIPYR          |                                                 |                    |                 | 69.7%                   | 997.49  | 499.76       | 2 |
| in vivo-ON | 753   | 760  | EGTYIPYR          |                                                 |                    |                 | 100.0%                  | 997.49  | 998.63       | 1 |
| in vivo-ON | 753   | 760  | EGTYIPYR          |                                                 |                    |                 | 100.0%                  | 997.49  | 998.59       | 1 |
| in vivo-ON | 761   | 777  | NSKLTNLLQYSLGGNSK |                                                 |                    |                 | 100.0%                  | 1835.97 | 919.30       | 2 |
| in vivo-ON | 764   | 777  | LTNLLQYSLGGNSK    |                                                 |                    |                 | 100.0%                  | 1506.80 | 754.40       | 2 |
| in vivo-ON | 764   | 777  | LTNLLQYSLGGNSK    |                                                 |                    |                 | 100.0%                  | 1506.80 | 754.67       | 2 |
| in vivo-ON | 764   | 777  | LTNLLQYSLGGNSK    |                                                 |                    |                 | 99.9%                   | 1506.80 | 754.84       | 2 |
| in vivo-ON | 764   | 777  | LTNLLQYSLGGNSK    |                                                 |                    |                 | 100.0%                  | 1506.80 | 754.37       | 2 |
| in vivo-ON | 764   | 777  | LTNLLQYSLGGNSK    |                                                 |                    |                 | 100.0%                  | 1506.80 | 754.69       | 2 |
| in vivo-ON | 764   | 777  | LTNLLQYSLGGNSK    |                                                 |                    |                 | 100.0%                  | 1506.80 | 754.64       | 2 |
| in vivo-ON | 764   | 777  | LTNLLQYSLGGNSK    |                                                 |                    |                 | 100.0%                  | 1506.80 | 755.01       | 2 |
| in vivo-ON | 764   | 777  | LTNLLQYSLGGNSK    |                                                 |                    |                 | 100.0%                  | 1506.80 | 754.73       | 2 |
| in vivo-ON | 764   | 777  | LTNLLQYSLGGNSK    |                                                 |                    |                 | 100.0%                  | 1506.80 | 754.71       | 2 |
| in vivo-ON | 764   | 777  | LTNLLQYSLGGNSK    |                                                 |                    |                 | 100.0%                  | 1506.80 | 754.69       | 2 |
| in vivo-ON | 764   | 777  | LTNLLQYSLGGNSK    |                                                 |                    |                 | 100.0%                  | 1506.80 | 754.75       | 2 |
| in vivo-ON | 764   | 777  | LTNLLQYSLGGNSK    |                                                 |                    |                 | 100.0%                  | 1506.80 | 755.21       | 2 |
| in vivo-ON | 764   | 777  | LTNLLQYSLGGNSK    |                                                 |                    |                 | 96.4%                   | 1506.80 | 755.20       | 2 |
| in vivo-ON | 764   | 777  | LTNLLQYSLGGNSK    |                                                 |                    |                 | 100.0%                  | 1506.80 | 503.69       | 3 |
| in vivo-ON | 764   | 777  | LTNLLQYSLGGNSK    |                                                 |                    |                 | 100.0%                  | 1506.80 | 503.51       | 3 |
| in vivo-ON | 764   | 777  | LTNLLQYSLGGNSK    |                                                 |                    |                 | 100.0%                  | 1506.80 | 503.54       | 3 |
| in vivo-ON | 764   | 777  | LTNLLQYSLGGNSK    |                                                 |                    |                 | 100.0%                  | 1506.80 | 503.82       | 3 |
| in vivo-ON | 764   | 777  | LTNLLQYSLGGNSK    |                                                 |                    |                 | 100.0%                  | 1506.80 | 754.54       | 2 |
| in vivo-ON | 764   | 777  | LTNLLQYSLGGNSK    |                                                 |                    |                 | 100.0%                  | 1506.80 | 754.58       | 2 |
| in vivo-ON | 764   | 777  | LTNLLQYSLGGNSK    |                                                 |                    |                 | 100.0%                  | 1506.80 | 754.41       | 2 |
| in vivo-ON | 764   | 777  | LTNLLQYSLGGNSK    |                                                 |                    |                 | 100.0%                  | 1506.80 | 754.73       | 2 |
| in vivo-ON | 764   | 777  | LTNLLQYSLGGNSK    |                                                 |                    |                 | 100.0%                  | 1506.80 | 754.54       | 2 |
| in vivo-ON | 764   | 777  | LTNLLQYSLGGNSK    |                                                 |                    |                 | 100.0%                  | 1506.80 | 755.34       | 2 |
| in vivo-ON | 764   | 777  | LTNLLQYSLGGNSK    |                                                 |                    |                 | 100.0%                  | 1506.80 | 754.70       | 2 |
| in vivo-ON | 764   | 777  | LTNLLQYSLGGNSK    |                                                 |                    |                 | 100.0%                  | 1506.80 | 754.84       | 2 |
| in vivo-ON | 764   | 777  | LTNLLQYSLGGNSK    |                                                 |                    |                 | 100.0%                  | 1506.80 | 754.86       | 2 |
| in vivo-ON | 764   | 777  | LTNLLQYSLGGNSK    |                                                 |                    |                 | 100.0%                  | 1506.80 | 754.80       | 2 |
| in vivo-ON | 764   | 777  | LTNLLQYSLGGNSK    |                                                 |                    |                 | 100.0%                  | 1506.80 | 754.51       | 2 |
| in vivo-ON | 764   | 777  | LTNLLQYSLGGNSK    |                                                 |                    |                 | 100.0%                  | 1506.80 | 755.54       | 2 |
| in vivo-ON | 764   | 777  | LTNLLQYSLGGNSK    |                                                 |                    |                 | 100.0%                  | 1506.80 | 754.71       | 2 |
| in vivo-ON | 764   | 777  | LTNLLQYSLGGNSK    |                                                 |                    |                 | 100.0%                  | 1506.80 | 754.79       | 2 |
| in vivo-ON | 764   | 777  | LTNLLQYSLGGNSK    |                                                 |                    |                 | 100.0%                  | 1506.80 | 754.84       | 2 |
| in vivo-ON | 764   | 777  | LTNLLQYSLGGNSK    |                                                 |                    |                 | 100.0%                  | 1506.80 | 754.67       | 2 |
| in vivo-ON | 764   | 777  | LTNLLQYSLGGNSK    |                                                 |                    |                 | 100.0%                  | 1506.80 | 754.83       | 2 |
| in vivo-ON | 764   | 777  | LTNLLQYSLGGNSK    |                                                 |                    |                 | 100.0%                  | 1506.80 | 755.35       | 2 |
| in vivo-ON | 764   | 777  | LTNLLQYSLGGNSK    |                                                 |                    |                 | 100.0%                  | 1506.80 | 754.43       | 2 |
| in vivo-ON | 764   | 777  | LTNLLQYSLGGNSK    |                                                 |                    |                 | 100.0%                  | 1506.80 | 754.82       | 2 |
| in vivo-ON | 764   | 777  | LTNLLQYSLGGNSK    |                                                 |                    |                 | 99.9%                   | 1506.80 | 754.76       | 2 |
| in vivo-ON | 764   | 777  | LTNLLQYSLGGNSK    |                                                 |                    |                 | 100.0%                  | 1506.80 | 754.78       | 2 |
| in vivo-ON | 764   | 777  | LTNLLQYSLGGNSK    |                                                 |                    |                 | 100.0%                  | 1506.80 | 503.70       | 3 |
| in vivo-ON | 764   | 777  | LTNLLQYSLGGNSK    |                                                 |                    |                 | 96.4%                   | 1506.80 | 503.53       | 3 |
| in vivo-ON | 764   | 777  | LTNLLQYSLGGNSK    |                                                 |                    |                 | 100.0%                  | 1506.80 | 503.73       | 3 |
| in vivo-ON | 764   | 777  | LTNLLQYSLGGNSK    |                                                 |                    |                 | 100.0%                  | 1506.80 | 1507.88      | 1 |
| in vivo-ON | 764   | 777  | LTNLLQYSLGGNSK    |                                                 |                    |                 | 100.0%                  | 1506.80 | 1508.00      | 1 |
| in vivo-ON | 771   | 779  | SLGGNSKTL         |                                                 |                    |                 | 99.4%                   | 875.47  | 438.74       | 2 |
| in vivo-ON | 778   | 788  | TLmFVNISPLK       | M3 Oxidation                                    | 100%               | 1,000.00        | 100.0%                  | 1277.71 | 640.12       | 2 |
| in vivo-ON | 778   | 788  | TLmFVNISPLK       | M3 Oxidation                                    | 100%               | 1,000.00        | 100.0%                  | 1277.71 | 640.14       | 2 |
| in vivo-ON | 778   | 788  | TLmFVNISPLK       | M3 Oxidation                                    | 100%               | 1,000.00        | 100.0%                  | 1277.71 | 640.17       | 2 |

Table S2

| Where      | Start | Stop | Peptide Sequence | Variable Modifications      | Localization Prob. | Ascore   | Scaffold: Peptide Prob. | Mass    | Observed m/z | Z |
|------------|-------|------|------------------|-----------------------------|--------------------|----------|-------------------------|---------|--------------|---|
| in vivo-ON | 778   | 788  | TLMFVNISPLK      | M3 Oxidation                | 100%               | 1,000.00 | 100.0%                  | 1277.71 | 639.99       | 2 |
| in vivo-ON | 778   | 788  | TLMFVNISPLK      | M3 Oxidation                | 100%               | 1,000.00 | 100.0%                  | 1277.71 | 640.15       | 2 |
| in vivo-ON | 778   | 788  | TLMFVNISPLK      |                             |                    |          | 100.0%                  | 1261.71 | 632.80       | 2 |
| in vivo-ON | 778   | 788  | TLMFVNISPLK      |                             |                    |          | 100.0%                  | 1261.71 | 632.24       | 2 |
| in vivo-ON | 778   | 788  | TLMFVNISPLK      | M3 Oxidation                | 100%               | 1,000.00 | 100.0%                  | 1277.71 | 640.29       | 2 |
| in vivo-ON | 778   | 788  | TLMFVNISPLK      | M3 Oxidation                | 100%               | 1,000.00 | 100.0%                  | 1277.71 | 640.18       | 2 |
| in vivo-ON | 778   | 788  | TLMFVNISPLK      |                             |                    |          | 100.0%                  | 1261.71 | 632.28       | 2 |
| in vivo-ON | 778   | 788  | TLMFVNISPLK      | M3 Oxidation                | 100%               | 1,000.00 | 100.0%                  | 1277.71 | 640.28       | 2 |
| in vivo-ON | 778   | 788  | TLMFVNISPLK      |                             |                    |          | 100.0%                  | 1261.71 | 632.19       | 2 |
| in vivo-ON | 778   | 788  | TLMFVNISPLK      |                             |                    |          | 100.0%                  | 1261.71 | 632.77       | 2 |
| in vivo-ON | 778   | 788  | TLMFVNISPLK      | M3 Oxidation                | 100%               | 1,000.00 | 100.0%                  | 1277.71 | 640.71       | 2 |
| in vivo-ON | 778   | 788  | TLMFVNISPLK      | M3 Oxidation                | 100%               | 1,000.00 | 100.0%                  | 1277.71 | 640.21       | 2 |
| in vivo-ON | 778   | 788  | TLMFVNISPLK      |                             |                    |          | 100.0%                  | 1261.71 | 632.31       | 2 |
| in vivo-ON | 778   | 788  | TLMFVNISPLK      | M3 Oxidation                | 100%               | 1,000.00 | 100.0%                  | 1277.71 | 640.40       | 2 |
| in vivo-ON | 778   | 788  | TLMFVNISPLK      | M3 Oxidation                | 100%               | 1,000.00 | 100.0%                  | 1277.71 | 640.04       | 2 |
| in vivo-ON | 778   | 788  | TLMFVNISPLK      |                             |                    |          | 100.0%                  | 1261.71 | 632.32       | 2 |
| in vivo-ON | 778   | 788  | TLMFVNISPLK      |                             |                    |          | 100.0%                  | 1261.71 | 632.18       | 2 |
| in vivo-ON | 778   | 788  | TLMFVNISPLK      | M3 Oxidation                | 100%               | 1,000.00 | 100.0%                  | 1277.71 | 640.08       | 2 |
| in vivo-ON | 778   | 788  | TLMFVNISPLK      |                             |                    |          | 100.0%                  | 1261.71 | 631.83       | 2 |
| in vivo-ON | 778   | 788  | TLMFVNISPLK      | M3 Oxidation                | 100%               | 1,000.00 | 100.0%                  | 1277.71 | 639.99       | 2 |
| in vivo-ON | 778   | 788  | TLMFVNISPLK      |                             |                    |          | 100.0%                  | 1261.71 | 632.03       | 2 |
| in vivo-ON | 778   | 788  | TLMFVNISPLK      |                             |                    |          | 100.0%                  | 1261.71 | 632.35       | 2 |
| in vivo-ON | 778   | 788  | TLMFVNISPLK      | M3 Oxidation                | 100%               | 1,000.00 | 100.0%                  | 1277.71 | 640.32       | 2 |
| in vivo-ON | 778   | 788  | TLMFVNISPLK      |                             |                    |          | 100.0%                  | 1261.71 | 632.72       | 2 |
| in vivo-ON | 778   | 788  | TLMFVNISPLK      |                             |                    |          | 100.0%                  | 1261.71 | 633.05       | 2 |
| in vivo-ON | 778   | 788  | TLMFVNISPLK      | M3 Oxidation                | 100%               | 1,000.00 | 100.0%                  | 1277.71 | 639.97       | 2 |
| in vivo-ON | 778   | 788  | TLMFVNISPLK      | M3 Oxidation                | 100%               | 1,000.00 | 100.0%                  | 1277.71 | 640.23       | 2 |
| in vivo-ON | 778   | 788  | TLMFVNISPLK      |                             |                    |          | 100.0%                  | 1261.71 | 632.79       | 2 |
| in vivo-ON | 778   | 788  | TLMFVNISPLK      |                             |                    |          | 98.7%                   | 1261.71 | 632.78       | 2 |
| in vivo-ON | 778   | 788  | TLMFVNISPLK      |                             |                    |          | 100.0%                  | 1261.71 | 632.72       | 2 |
| in vivo-ON | 778   | 788  | TLMFVNISPLK      | M3 Oxidation                | 100%               | 1,000.00 | 100.0%                  | 1277.71 | 640.16       | 2 |
| in vivo-ON | 778   | 788  | TLMFVNISPLK      |                             |                    |          | 99.7%                   | 1261.71 | 632.78       | 2 |
| in vivo-ON | 778   | 788  | TLMFVNISPLK      |                             |                    |          | 100.0%                  | 1261.71 | 632.23       | 2 |
| in vivo-ON | 778   | 788  | TLMFVNISPLK      | M3 Oxidation                | 100%               | 1,000.00 | 100.0%                  | 1277.71 | 640.20       | 2 |
| in vivo-ON | 778   | 788  | TLMFVNISPLK      |                             |                    |          | 50.2%                   | 1261.71 | 632.91       | 2 |
| in vivo-ON | 778   | 788  | TLMFVNISPLK      | M3 Oxidation                | 100%               | 1,000.00 | 100.0%                  | 1277.71 | 640.40       | 2 |
| in vivo-ON | 778   | 788  | TLMFVNISPLK      | M3 Oxidation                | 100%               | 1,000.00 | 95.4%                   | 1277.71 | 640.84       | 2 |
| in vivo-ON | 778   | 788  | TLMFVNISPLK      | M3 Oxidation                | 100%               | 1,000.00 | 100.0%                  | 1277.71 | 640.67       | 2 |
| in vivo-ON | 778   | 788  | TLMFVNISPLK      |                             |                    |          | 100.0%                  | 1261.71 | 632.46       | 2 |
| in vivo-ON | 778   | 788  | TLMFVNISPLK      |                             |                    |          | 100.0%                  | 1261.71 | 1262.76      | 1 |
| in vivo-ON | 778   | 788  | TLMFVNISPLK      | M3 Oxidation                | 100%               | 1,000.00 | 100.0%                  | 1277.71 | 1262.66      | 1 |
| in vivo-ON | 778   | 788  | TLMFVNISPLK      | M3 Oxidation                | 100%               | 1,000.00 | 100.0%                  | 1277.71 | 1278.76      | 1 |
| in vivo-ON | 789   | 799  | QHVPETLcSLR      | C8 Iodoacetamide derivative | 100%               | 1,000.00 | 99.8%                   | 1338.67 | 447.57       | 3 |
| in vivo-ON | 789   | 799  | QHVPETLcSLR      | C8 Iodoacetamide derivative | 100%               | 1,000.00 | 85.6%                   | 1338.67 | 670.24       | 2 |
| in vivo-ON | 789   | 799  | QHVPETLcSLR      | C8 Iodoacetamide derivative | 100%               | 1,000.00 | 98.3%                   | 1338.67 | 670.57       | 2 |
| in vivo-ON | 800   | 813  | FATKVNNTQIGTAR   |                             |                    |          | 96.0%                   | 1519.81 | 508.03       | 3 |
| in vivo-ON | 800   | 813  | FATKVNNTQIGTAR   |                             |                    |          | 99.9%                   | 1519.81 | 761.25       | 2 |
| in vivo-ON | 804   | 813  | VNNTQIGTAR       |                             |                    |          | 99.5%                   | 1072.56 | 537.82       | 2 |
| in vivo-ON | 804   | 813  | VNNTQIGTAR       |                             |                    |          | 100.0%                  | 1072.56 | 537.51       | 2 |
| in vivo-ON | 804   | 813  | VNNTQIGTAR       |                             |                    |          | 100.0%                  | 1072.56 | 537.37       | 2 |
| in vivo-ON | 804   | 813  | VNNTQIGTAR       |                             |                    |          | 100.0%                  | 1072.56 | 537.49       | 2 |
| in vivo-ON | 804   | 813  | VNNTQIGTAR       |                             |                    |          | 100.0%                  | 1072.56 | 537.55       | 2 |
| in vivo-ON | 804   | 813  | VNNTQIGTAR       |                             |                    |          | 98.5%                   | 1072.56 | 538.13       | 2 |
| in vivo-ON | 804   | 813  | VNNTQIGTAR       |                             |                    |          | 100.0%                  | 1072.56 | 537.55       | 2 |
| in vivo-ON | 804   | 813  | VNNTQIGTAR       |                             |                    |          | 100.0%                  | 1072.56 | 537.31       | 2 |
| in vivo-ON | 804   | 813  | VNNTQIGTAR       |                             |                    |          | 100.0%                  | 1072.56 | 537.58       | 2 |
| in vivo-ON | 804   | 813  | VNNTQIGTAR       |                             |                    |          | 100.0%                  | 1072.56 | 537.58       | 2 |
| in vivo-ON | 804   | 813  | VNNTQIGTAR       |                             |                    |          | 100.0%                  | 1072.56 | 537.31       | 2 |



| Where      | Start | Stop | Peptide Sequence | Variable Modifications | Localization Prob. | Ascore | Scaffold: Peptide Prob. | Mass    | Observed m/z | z |
|------------|-------|------|------------------|------------------------|--------------------|--------|-------------------------|---------|--------------|---|
| in vivo-ON | 804   | 813  | VNNTQIGTAR       |                        |                    |        | 100.0%                  | 1072.56 | 537.54       | 2 |
| in vivo-ON | 804   | 813  | VNNTQIGTAR       |                        |                    |        | 100.0%                  | 1072.56 | 537.54       | 2 |
| in vivo-ON | 804   | 813  | VNNTQIGTAR       |                        |                    |        | 96.3%                   | 1072.56 | 538.11       | 2 |
| in vivo-ON | 804   | 813  | VNNTQIGTAR       |                        |                    |        | 100.0%                  | 1072.56 | 537.72       | 2 |
| in vivo-ON | 804   | 813  | VNNTQIGTAR       |                        |                    |        | 100.0%                  | 1072.56 | 537.68       | 2 |
| in vivo-ON | 804   | 813  | VNNTQIGTAR       |                        |                    |        | 100.0%                  | 1072.56 | 537.43       | 2 |
| in vivo-ON | 804   | 813  | VNNTQIGTAR       |                        |                    |        | 100.0%                  | 1072.56 | 537.61       | 2 |
| in vivo-ON | 804   | 813  | VNNTQIGTAR       |                        |                    |        | 100.0%                  | 1072.56 | 538.27       | 2 |
| in vivo-ON | 804   | 813  | VNNTQIGTAR       |                        |                    |        | 100.0%                  | 1072.56 | 537.90       | 2 |
| in vivo-ON | 804   | 813  | VNNTQIGTAR       |                        |                    |        | 100.0%                  | 1072.56 | 1073.66      | 1 |
| in vivo-ON | 804   | 813  | VNNTQIGTAR       |                        |                    |        | 100.0%                  | 1072.56 | 1073.74      | 1 |
| in vivo-ON | 804   | 813  | VNNTQIGTAR       |                        |                    |        | 100.0%                  | 1072.56 | 1073.66      | 1 |
| in vivo-ON | 804   | 813  | VNNTQIGTAR       |                        |                    |        | 93.4%                   | 1072.56 | 1074.73      | 1 |
| in vivo-ON | 804   | 813  | VNNTQIGTAR       |                        |                    |        | 68.6%                   | 1072.56 | 1074.80      | 1 |
| in vivo-ON | 804   | 813  | VNNTQIGTAR       |                        |                    |        | 94.7%                   | 1072.56 | 1073.75      | 1 |

Table Key: Where = where the site was identified (in vitro or in vivo-ON = cdc16-116, in vivo-OFF = sid2-250), Start and Stop = amino acid numbers of the beginning and end of the identified peptide, Peptide Sequence = amino acid sequence of identified peptide, lowercase letter(s) indicate site(s) of modification, Variable Modifications = type of modification (Note that 'Dehydro' or loss of water often indicates phosphorylation), Localization Probability = Scaffold's score for the modification localization, Ascore = Ascore for modification localization (see Beausoleil SA, Villén J, Gerber SA, Rush J, Gygi SP. Nat Biotechnol. 2006, 24(10):1285.), Scaffold:Peptide Probability = peptide identification probability based on Peptide Prophet<sup>TM</sup> (see Keller A, Nesvizhskii AI, Kolker E, Aebersold R., Anal Chem. 2002 15;74(20):5383.), Peptide Mass = mass of peptide (Da), Observed m/z = detected mass/charge, Charge = charge of peptide ion observed

**Table S3. All RXXS sites identified in Klp2 by LC-MS/MS**

| Where?     | Start | Stop | Peptide Sequence           | Site(s)         | Variable Modifications                  | Localization Prob. | Ascore      | Scaffold: Peptide Prob. | Mass    | Observed m/z | Z |
|------------|-------|------|----------------------------|-----------------|-----------------------------------------|--------------------|-------------|-------------------------|---------|--------------|---|
| in vitro   | 111   | 120  | SVsASSHFGR                 | S113            | S3 Dehydro                              | 100%               | 23.3        | 100.0%                  | 1015.48 | 508.93       | 2 |
| in vitro   | 111   | 120  | SVsASSHFGR                 | S113            | S3 Dehydro                              | 100%               | 18.53       | 100.0%                  | 1015.48 | 508.94       | 2 |
| in vitro   | 111   | 120  | SVsASSHFGR                 | S113            | S3 Dehydro                              | 100%               | 23.3        | 100.0%                  | 1015.48 | 508.94       | 2 |
| in vitro   | 111   | 120  | SVsASSHFGR                 | S113            | S3 Dehydro                              | 100%               | 25.77       | 100.0%                  | 1015.48 | 508.95       | 2 |
| in vitro   | 111   | 120  | SVsASSHFGR                 | S113            | S3 Dehydro                              | 100%               | 39.03       | 99.9%                   | 1015.48 | 508.95       | 2 |
| in vitro   | 111   | 120  | SVsASSHFGR                 | S113            | S3 Dehydro                              | 100%               | 21.4        | 99.7%                   | 1015.48 | 508.95       | 2 |
| in vitro   | 111   | 120  | SVsASSHFGR                 | S113            | S3 Phosphorylation                      | 100%               | 25.77       | 99.6%                   | 1113.46 | 557.99       | 2 |
| in vitro   | 111   | 120  | SVsASSHFGR                 | S113            | S3 Dehydro                              | 100%               | 18.53       | 99.2%                   | 1015.48 | 508.98       | 2 |
| in vitro   | 111   | 120  | SVsASSHFGR                 | S113            | S3 Dehydro                              | 100%               | 34.65       | 99.0%                   | 1015.48 | 508.94       | 2 |
| in vitro   | 111   | 120  | SVsASSHFGR                 | S113            | S3 Dehydro                              | 100%               | 23.3        | 97.5%                   | 1015.48 | 508.91       | 2 |
| in vitro   | 111   | 120  | SVsASSHFGR                 | S113            | S3 Dehydro                              | 100%               | 25.77       | 97.1%                   | 1015.48 | 508.93       | 2 |
| in vitro   | 111   | 120  | SVsASSHFGR                 | S113            | S3 Phosphorylation                      | 100%               | 23.3        | 92.4%                   | 1113.46 | 558.00       | 2 |
| in vitro   | 111   | 120  | SVsASSHFGR                 | S113            | S3 Dehydro                              | 100%               | 23.3        | 92.2%                   | 1015.48 | 508.95       | 2 |
| in vitro   | 111   | 120  | SVsASSHFGR                 | S113            | S3 Dehydro                              | 93%                | 11.45       | 89.5%                   | 1015.48 | 508.95       | 2 |
| in vitro   | 111   | 120  | SVsASSHFGR                 | S113            | S3 Dehydro                              | 100%               | 25.77       | 75.5%                   | 1015.48 | 508.82       | 2 |
| in vitro   | 111   | 120  | SVsASSHFGR                 | S113            | S3 Phosphorylation                      | 100%               | 25.77       | 64.8%                   | 1113.46 | 557.95       | 2 |
| in vitro   | 121   | 136  | PAsAVSSSLNSSDDVR           | S123            | S3 Phosphorylation                      | 56%                | 5.77        | 100.0%                  | 1670.71 | 836.12       | 2 |
| in vivo-ON | 111   | 120  | SVsASSHFGR                 | S113            | S3 Dehydro                              | 100%               | 31.37       | 100.0%                  | 1015.48 | 509.01       | 2 |
| in vivo-ON | 111   | 120  | SVsASSHFGR                 | S113            | S3 Dehydro                              | 100%               | 19.84       | 100.0%                  | 1015.48 | 509.03       | 2 |
| in vivo-ON | 111   | 136  | SVsASSHFGRPASAVSSSLNSSDDVR | S113            | S3 Dehydro                              | 72%                | 9.05        | 62.0%                   | 2588.22 | 864.18       | 3 |
| in vivo-ON | 111   | 136  | SVsASSHFGRPASAVSSSLNSSDDVR | S113            | S3 Phosphorylation                      | 47%                | 8.63        | 100.0%                  | 2686.20 | 897.05       | 3 |
| in vivo-ON | 111   | 136  | SVsASSHFGRPASAVSSSLNSSDDVR | S113            | S3 Dehydro                              | 4%                 | 0           | 100.0%                  | 2588.22 | 864.19       | 3 |
| in vivo-ON | 111   | 136  | SVsASSHFGRPASAVSSSLNSSDDVR | S113            | S3 Phosphorylation                      | 5%                 | 0           | 100.0%                  | 2686.20 | 896.96       | 3 |
| in vivo-ON | 111   | 136  | SVsASSHFGRPASAVSSSLNSSDDVR | S113            | S3 Phosphorylation                      | 21%                | 0           | 100.0%                  | 2686.20 | 896.84       | 3 |
| in vivo-ON | 111   | 136  | SVsASSHFGRPASAVSSSLNSSDDVR | S113            | S3 Phosphorylation                      | 0%                 | 0           | 96.1%                   | 2686.20 | 896.74       | 3 |
| in vivo-ON | 111   | 136  | SVsASSHFGRPASAVSSSLNSSDDVR | S113            | S3 Dehydro                              | 3%                 | 14.04       | 93.0%                   | 2588.22 | 864.13       | 3 |
| in vivo-ON | 111   | 136  | SVsASSHFGRPASAVSSSLNSSDDVR | S113            | S3 Dehydro                              | 20%                | 7.87        | 81.5%                   | 2588.22 | 864.30       | 3 |
| in vivo-ON | 111   | 136  | SVsASSHFGRPASAVSSSLNSSDDVR | S113            | S3 Dehydro                              | 1%                 | 11.1        | 68.7%                   | 2588.22 | 864.14       | 3 |
| in vivo-ON | 111   | 136  | SVsASSHFGRPASAVSSSLNSSDDVR | S113            | S3 Dehydro                              | 1%                 | 0           | 58.6%                   | 2588.22 | 864.21       | 3 |
| in vivo-ON | 111   | 136  | SVsASSHFGRPASAVSSSLNSSDDVR | S113            | S3 Dehydro                              | 24%                | 7.39        | 53.1%                   | 2588.22 | 864.17       | 3 |
| in vivo-ON | 111   | 136  | SVsASSHFGRPASAVSSSLNSSDDVR | S113, S123      | S3 Phosphorylation, S13 Phosphorylation | 21%, 100%          | 0.00, 24.53 | 39.1%                   | 2766.16 | 923.65       | 3 |
| in vivo-ON | 111   | 136  | sVSASSHFGRPASAVSSSLNSSDDVR | S111, S123      | S1 Phosphorylation, S13 Phosphorylation | 18%, 96%           | 0.00, 16.36 | 20.0%                   | 2766.16 | 923.44       | 3 |
| in vivo-ON | 111   | 136  | SVsASSHFGRPASAVSSSLNSSDDVR | S113, S123      | S3 Phosphorylation, S13 Dehydro         | 0%, 93%            | 0.00, 17.90 | 9.6%                    | 2668.19 | 890.66       | 3 |
| in vivo-ON | 111   | 136  | SVsASSHFGRPASAVSSSLNSSDDVR | S113, S115/S116 | S3 Phosphorylation, S6 Phosphorylation  | 0%, 99%            | 0.00, 23.70 | 7.7%                    | 2766.16 | 923.27       | 3 |

Table key: Where = where the site was identified (as in Supplemental Table 2), Start and Stop = amino acid numbers of the beginning and end of the phosphopeptide ID'd, Peptide Sequence = amino acid sequence of peptide ID'd and lowercase 's' is phosphoserine, Site = modified amino acids(s) in Klp2, Variable Modifications = type of modification (Phosphorylation or Dehydro can indicate phosphorylation), Localization Probability = Scaffold's score for the modification localization, Ascore = Ascore for modification localization (see Beausoleil SA, Villén J, Gerber SA, Rush J, Gygi SP. Nat Biotechnol. 2006, 24(10):1285.), Scaffold:Peptide Probability = peptide identification probability based on Peptide Prophet™ (see Keller A, Nesvizhskii AI, Kolker E, Aebersold R., Anal Chem. 2002 15;74(20):5383.), Mass = mass of peptide (Da), Observed m/z = detected mass/charge, Charge = charge of peptide ion observed

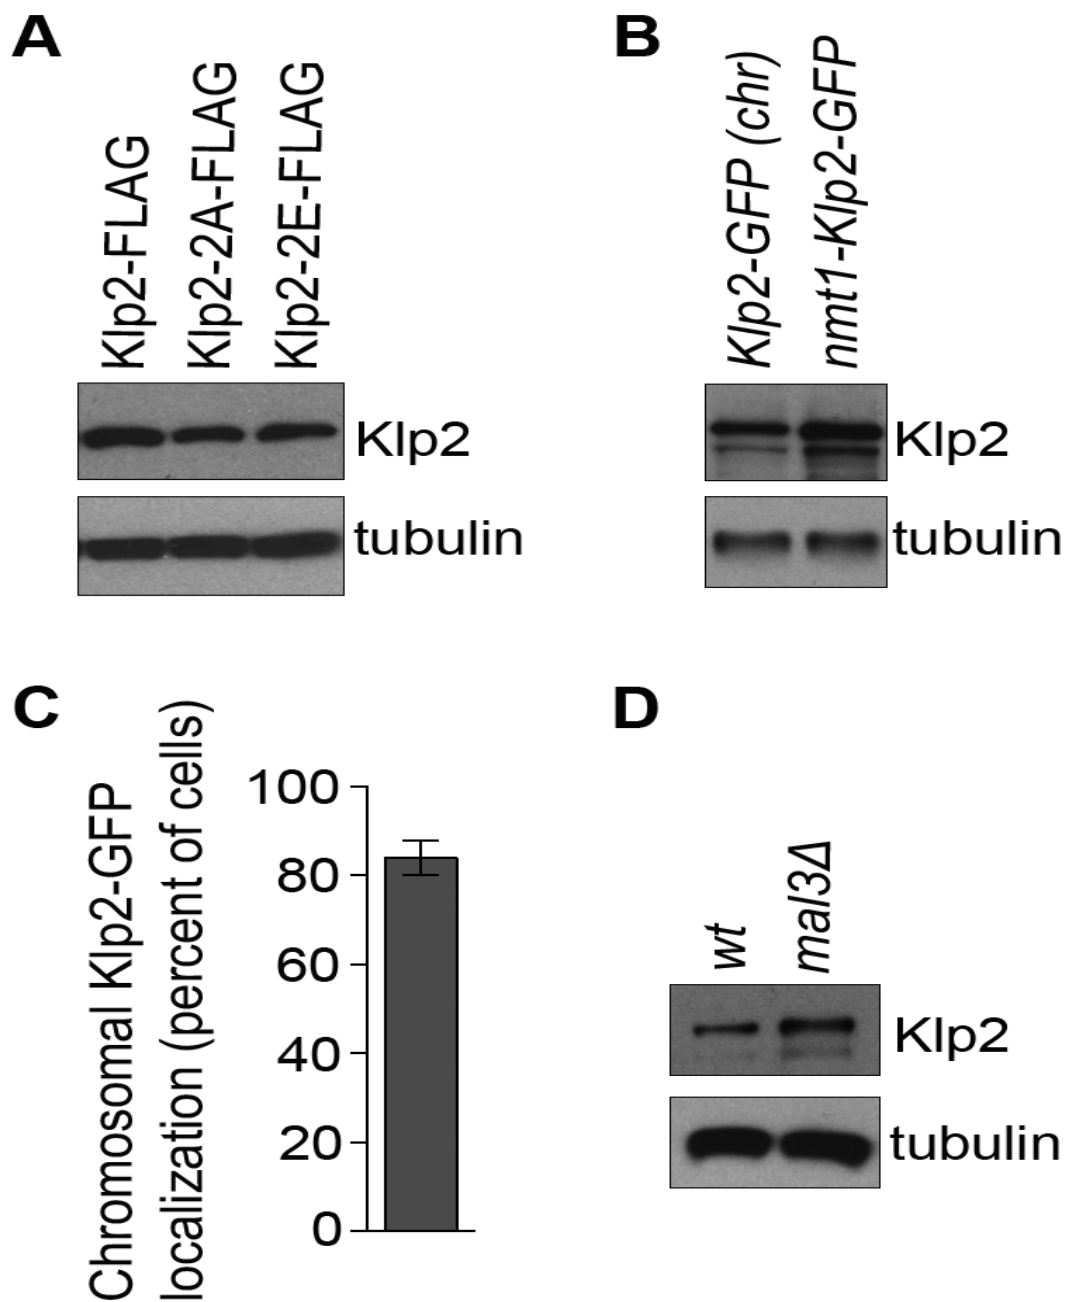

**Figure S1:** Klp2 expression levels and localization of chromosomal Klp2-GFP. (A) Protein levels of Klp2-FLAG, Klp2-2A-FLAG, and Klp2-2E-FLAG were compared to each other by Western blotting. (B) Protein levels of Klp2-GFP expressed from the endogenous and from the *nmt1* promoter under repressed condition were tested by immuno-blotting. (C) Cells were scored for Klp2-GFP puncta. Klp2-GFP was expressed from the endogenous promoter. (D) Protein levels of Klp2-GFP expressed from the endogenous promoter in the indicated genotypes were tested by immuno-blotting.
